# Supplementary material for: Evolution of the shut-off steps of vertebrate phototransduction
Source: PubMed Central journal article supplement (PMC5795056; doi:10.1098/rsob.170232), 2018-01-10
Supplement: rsob170232supp2.pdf [file rsob170232supp2.pdf]

## Supplementary Tables for

### Evolution of the shut-off steps of vertebrate phototransduction

Trevor D. Lamb<sup>1</sup>, Hardip R. Patel<sup>2</sup>, Aaron Chuah<sup>3</sup>, and David M. Hunt<sup>4,5</sup>

<sup>1</sup>Eccles Institute of Neuroscience, <sup>2</sup>National Centre for Indigenous Genomics, and <sup>3</sup>Genome Discovery Unit, John Curtin School of Medical Research, The Australian National University, ACT 2600, Australia, and <sup>4</sup>The Lions Eye Institute and <sup>5</sup>School of Biological Sciences, The University of Western Australia, WA 6009, Australia.

#### Contents

|                                                                              | Page |
|------------------------------------------------------------------------------|------|
| <b>Supplementary Table S1.</b> Summary of transcripts examined.              | 2    |
| <b>Supplementary Table S2.</b> Multiple sequence alignment for GRKs.         | 5    |
| <b>Supplementary Table S3.</b> Multiple sequence alignment for arrestins.    | 11   |
| <b>Supplementary Table S4.</b> Multiple sequence alignment for RGS9/11s.     | 15   |
| <b>Supplementary Table S5.</b> Multiple sequence alignment for G $\beta$ 5s. | 21   |
| <b>Supplementary Table S6.</b> Multiple sequence alignment for R9APs.        | 23   |

**Supplementary Table S1. Summary of transcripts examined**

| #  | Comp.  | Label on Figures                                  | Accession number | aa's | Join | M | * | RPKM   | RPKM -CDS |
|----|--------|---------------------------------------------------|------------------|------|------|---|---|--------|-----------|
| 1  | GRK1X  | GRK1X G.australis 57773-1-1                       | MG063622         | 571  |      | M | * | 18.1   | 13.2      |
| 2  | GRK1X  | GRK1X M.mordax 42166-5-1                          | MG063623         | 569  |      | M | * | 37.1   | 32.5      |
| 3  | GRK1A  | GRK1A Western ray 41513-9-2                       | MG063624         | 564  |      | M | * | 104.7  | 107.5     |
| 4  | GRK1A  | [ GRK1A Eastern ray 24652-2-1 ]                   | MG063625         | 564  |      | M | * | 13.8   | 13.3      |
| 5  | GRK1A  | GRK1A Bluespot ray 29212-2-1                      | MG063626         | 564  |      | M | * | 191.0  | 171.8     |
| 6  | GRK1A  | GRK1A Bamboo shark 8046-1-1                       | MG063627         | 565  |      | M | * | 270.5  | 315.7     |
| 7  | GRK1A  | GRK1A Reef shark 53758-1-1                        | MG063628         | 565  |      | M | * | 354.5  | 449.6     |
| 8  | GRK1A  | GRK1A Florida gar 24879-1-1                       | MG063629         | 563  |      | M | * | 248.2  | 206.8     |
| 9  | GRK1A  | GRK1A Bowfin 29529-1-1                            | MG063630         | 563  |      | M | * | 264.1  | 322.3     |
| 10 | GRK1B  | GRK1B Western ray 34447-1-1                       | MG063631         | 558  |      | M | * | 8.0    | 8.7       |
| 11 | GRK1B  | [ GRK1B-Partial Eastern ray 22403-1-1 ]           | MG063632         | 500  |      | M |   | 4.4    | 4.7       |
| 12 | GRK1B  | GRK1B Bluespot ray 4032-1-1                       | MG063633         | 558  |      | M | * | 37.3   | 41.0      |
| 13 | GRK1B  | GRK1B Bamboo shark 26651-1-1                      | MG063634         | 559  |      | M | * | 2.9    | 2.8       |
| 14 | GRK1B  | GRK1B Bowfin 26676-4-1                            | MG063635         | 561  |      | M | * | 21.1   | 21.8      |
| 15 | GRK7   | GRK7 Western ray 39734-1-1                        | MG063636         | 554  |      | M | * | 160.6  | 182.3     |
| 16 | GRK7   | [ GRK7 Eastern ray 24666-1-1 ]                    | MG063637         | 554  |      | M | * | 184.0  | 58.1      |
| 17 | GRK7   | GRK7 Bluespot ray 37188-7-2                       | MG063638         | 554  |      | M | * | 62.6   | 75.3      |
| 18 | GRK7   | GRK7 Bamboo shark 35291-1-1                       | MG063639         | 552  |      | M | * | 339.8  | 466.6     |
| 19 | GRK7   | GRK7 Reef shark 15561-1-1                         | MG063640         | 555  |      | M | * | 384.3  | 437.0     |
| 20 | GRK7   | GRK7 Florida gar 30401-2-1                        | MG063641         | 550  |      | M | * | 27.2   | 27.2      |
| 21 | GRK7   | GRK7 Bowfin 27257-5-2                             | MG063642         | 551  |      | M | * | 73.6   | 111.4     |
| 22 | GRK7-1 | GRK7-1 G.australis 58623-2-1w1-2                  | MG063643         | 556  | J    | M | * | 8.8    | 18.4      |
| 23 | GRK7-1 | GRK7-1 M.mordax 40500-6-1                         | MG063644         | 553  |      | M | * | 25.6   | 27.7      |
| 24 | GRK7-2 | GRK7-2 E.cirrhatus 127887-1-1                     | MG063645         | 549  |      | M | * | 40.7   | 55.0      |
| 25 | GRK7-2 | GRK7-2-Non-contig G.australis 26295-2-1w27699-1-1 | MG063646         | 486  | NJ   |   |   | 6.4    | 6.4       |
| 26 | Arr-S1 | Arr-S1 Western ray 26221-2-1                      | MG063647         | 390  |      | M | * | 1189.5 | 2436.4    |
| 27 | Arr-S1 | [ Arr-S1 Eastern ray 41685-1-1 ]                  | MG063648         | 390  |      | M | * | 2745.4 | 687.7     |
| 28 | Arr-S1 | Arr-S1 Bluespot ray 30422-1-1                     | MG063649         | 390  |      | M | * | 3503.3 | 4155.8    |
| 29 | Arr-S1 | Arr-S1 Bamboo shark 45077-7-1                     | MG063650         | 384  |      | M | * | 2115.6 | 2268.8    |
| 30 | Arr-S1 | Arr-S1 Reef shark 55938-25-1                      | MG063651         | 383  |      | M | * | 2475.3 | 4997.8    |
| 31 | Arr-S2 | Arr-S2 Western ray 22644-1-1                      | MG063652         | 427  |      | M | * | 384.5  | 461.4     |
| 32 | Arr-S2 | [ Arr-S2 Eastern ray 20756-1-1 ]                  | MG063653         | 427  |      | M | * | 125.2  | 175.0     |
| 33 | Arr-S2 | Arr-S2 Bluespot ray 31414-1-1                     | MG063654         | 420  |      | M | * | 746.8  | 852.2     |
| 34 | Arr-S2 | Arr-S2 Bamboo shark 28962-1-1                     | MG063655         | 422  |      | M | * | 931.8  | 1104.3    |
| 35 | Arr-S2 | Arr-S2 Reef shark 55253-10-3                      | MG063656         | 422  |      | M | * | 228.3  | 232.1     |
| 36 | Arr-S  | Arr-S Florida gar 22184-1-1                       | MG063657         | 391  |      | M | * | 1390.9 | 1199.4    |
| 37 | Arr-S  | Arr-S Bowfin 24232-1-2                            | MG063658         | 392  |      | M | * | 1527.0 | 2067.2    |
| 38 | Arr-VY | Arr-VY E.cirrhatus 129805-1-1                     | MG063659         | 385  |      | M | * | 431.6  | 626.4     |
| 39 | Arr-VY | Arr-VY G.australis 54008-1-2                      | MG063660         | 405  |      | M | * | 976.0  | 1170.1    |
| 40 | Arr-VX | Arr-VX G.australis 59149-4-1                      | MG063661         | 392  |      | M | * | 988.0  | 1243.1    |
| 41 | Arr-VX | Arr-VX M.mordax 42250-9-1                         | MG063662         | 391  |      | M | * | 921.9  | 1039.0    |
| 42 | Arr-C  | Arr-C Western ray 37242-1-1                       | MG063663         | 394  |      | M | * | 145.9  | 268.3     |
| 43 | Arr-C  | [ Arr-C Eastern ray 20877-1-1 ]                   | MG063664         | 394  |      | M | * | 319.1  | 50.9      |
| 44 | Arr-C  | Arr-C Bluespot ray 36257-4-1                      | MG063665         | 394  |      | M | * | 198.7  | 205.3     |
| 45 | Arr-C  | Arr-C Bamboo shark 45371-8-2                      | MG063666         | 394  |      | M | * | 79.7   | 87.5      |

|    |        |                                                                    |          |     |    |   |   |        |        |
|----|--------|--------------------------------------------------------------------|----------|-----|----|---|---|--------|--------|
| 46 | Arr-C  | Arr-C Florida gar 15939-1-1                                        | MG063667 | 388 |    | M | * | 1139.6 | 1172.2 |
| 47 | Arr-C  | Arr-C Bowfin 14016-1-1                                             | MG063668 | 386 |    | M | * | 2604.9 | 3140.9 |
| 48 | Arr-BX | Arr-BX-Partial G.australis<br>54326-4-1w1-1w2-3                    | MG063669 | 332 | J  |   | * | 18.3   | 19.4   |
| 49 | Arr-BX | Arr-BX-Partial M.mordax 41599-4-1                                  | MG063670 | 243 |    |   | * | 46.7   | 49.8   |
| 50 | Arr-BY | Arr-BY-Non-contig G.australis<br>41931-1-1w37543-2-1w1-1w53942-1-1 | MG063671 | 354 | NJ | M | * | 5.5    | 6.1    |
| 51 | Arr-BY | Arr-BY M.mordax 41599-5-1                                          | MG063672 | 423 |    | M | * | 24.7   | 26.4   |
| 52 | Arr-B1 | Arr-B1 Florida gar 28267-2-1w1-11                                  | MG063673 | 418 | J  | M | * | 11.8   | 7.2    |
| 53 | Arr-B1 | Arr-B1 Bowfin 26818-1-6                                            | MG063674 | 418 |    | M | * | 19.5   | 12.9   |
| 54 | RGS9   | RGS9 E.cirrhatous 137654-1-3                                       | MG063675 | 498 |    | M | * | 128.9  | 156.7  |
| 55 | RGS9   | RGS9 G.australis 56905-1-2                                         | MG063676 | 478 |    | M | * | 50.8   | 56.7   |
| 56 | RGS9   | RGS9 M.mordax 34174-1-2                                            | MG063677 | 478 |    | M | * | 8.8    | 10.0   |
| 57 | RGS9   | RGS9 Western ray 41046-8-8                                         | MG063678 | 490 |    | M | * | 23.1   | 25.4   |
| 58 | RGS9   | [ RGS9-Non-contig Eastern ray<br>1867-2-1w1-1 ]                    | MG063679 | 478 | NJ | M | * | 3.2    | 3.3    |
| 59 | RGS9   | RGS9 Bluespot ray 37076-2-1                                        | MG063680 | 490 |    | M | * | 83.9   | 96.6   |
| 60 | RGS9   | RGS9 Bamboo shark 45486-8-1                                        | MG063681 | 490 |    | M | * | 51.1   | 56.1   |
| 61 | RGS9   | RGS9 Reef shark 51239-1-1                                          | MG063682 | 491 |    | M | * | 70.6   | 81.9   |
| 62 | RGS9   | RGS9 Florida gar 21856-1-2                                         | MG063683 | 489 |    | M | * | 112.7  | 85.9   |
| 63 | RGS9   | RGS9 Bowfin 26690-1-1                                              | MG063684 | 487 |    | M | * | 74.5   | 60.7   |
| 64 | RGS11  | RGS11 E.cirrhatous 136920-1-2                                      | MG063685 | 433 |    | M | * | 5.6    | 6.1    |
| 65 | RGS11  | RGS11 G.australis 47497-1-2                                        | MG063686 | 419 |    | M | * | 13.0   | 15.7   |
| 66 | RGS11  | RGS11 M.mordax 39562-1-2                                           | MG063687 | 413 |    | M | * | 2.8    | 6.2    |
| 67 | RGS11  | RGS11 Western ray 41178-3-3                                        | MG063688 | 465 |    | M | * | 26.4   | 28.3   |
| 68 | RGS11  | [ RGS11-Partial Eastern ray 22212-1-3 ]                            | MG063689 | 391 |    |   | * | 15.9   | 16.3   |
| 69 | RGS11  | RGS11 Bluespot ray 32308-1-2                                       | MG063690 | 467 |    | M | * | 32.7   | 29.2   |
| 70 | RGS11  | RGS11 Bamboo shark 41815-1-3                                       | MG063691 | 465 |    | M | * | 10.3   | 10.2   |
| 71 | RGS11  | RGS11 Reef shark 50711-1-1                                         | MG063692 | 461 |    |   | * | 9.3    | 10.9   |
| 72 | RGS11  | RGS11 Florida gar 29521-1-2                                        | MG063693 | 471 |    | M | * | 7.6    | 5.3    |
| 73 | RGS11  | RGS11 Bowfin 26311-1-2w1-5                                         | MG063694 | 469 | J  | M | * | 18.9   | 31.0   |
| 74 | Gb5L   | Gb5L E.cirrhatous 130391-1-2                                       | MG063695 | 395 |    | M | * | 72.0   | 94.2   |
| 75 | Gb5L   | Gb5L G.australis 57438-2-2                                         | MG063696 | 395 |    | M | * | 37.7   | 55.9   |
| 76 | Gb5L   | Gb5L M.mordax 41947-2-2                                            | MG063697 | 395 |    | M | * | 30.5   | 33.2   |
| 77 | Gb5L   | Gb5L Western ray 37263-2-2                                         | MG063698 | 395 |    | M | * | 127.0  | 137.6  |
| 78 | Gb5L   | [ Gb5L Eastern ray 13249-1-1 ]                                     | MG063699 | 395 |    | M | * | 141.0  | 17.3   |
| 79 | Gb5L   | Gb5L Bluespot ray 28709-1-1                                        | MG063700 | 395 |    | M | * | 186.6  | 198.6  |
| 80 | Gb5L   | Gb5L Bamboo shark 37645-2-1                                        | MG063701 | 395 |    | M | * | 90.0   | 95.6   |
| 81 | Gb5L   | Gb5L Reef shark 40872-1-1                                          | MG063702 | 395 |    | M | * | 221.0  | 252.4  |
| 82 | Gb5L   | Gb5L Florida gar 16504-1-1                                         | MG063703 | 395 |    | M | * | 102.4  | 66.4   |
| 83 | Gb5L   | Gb5L Bowfin 22627-1-1                                              | MG063704 | 395 |    | M | * | 41.0   | 77.3   |
| 84 | R9AP   | R9AP E.cirrhatous 138946-5-1                                       | MG063705 | 246 |    | M | * | 7.7    | 4.7    |
| 85 | R9AP   | R9AP G.australis 56404-2-1                                         | MG063706 | 238 |    | M | * | 7.9    | 9.8    |
| 86 | R9AP   | R9AP M.mordax 41679-5-1                                            | MG063707 | 243 |    | M | * | 16.0   | 12.7   |
| 87 | R9AP   | R9AP Western ray 30726-1-1                                         | MG063708 | 244 |    | M | * | 19.6   | 30.0   |
| 88 | R9AP   | [ R9AP Eastern ray 17388-1-1 ]                                     | MG063709 | 244 |    | M | * | 25.9   | 21.9   |
| 89 | R9AP   | R9AP Bluespot ray 25945-2-2                                        | MG063710 | 238 |    | M | * | 41.4   | 51.9   |
| 90 | R9AP   | R9AP Bamboo shark 37642-1-1                                        | MG063711 | 239 |    | M | * | 8.7    | 9.7    |
| 91 | R9AP   | R9AP Reef shark 40575-1-1                                          | MG063712 | 234 |    | M | * | 4.8    | 5.5    |
| 92 | R9AP   | R9AP Florida gar 28835-2-1                                         | MG063713 | 238 |    | M | * | 27.3   | 52.3   |
| 93 | R9AP   | R9AP Bowfin 1668-1-1                                               | MG063714 | 238 |    | M | * | 36.0   | 63.4   |

|    |        |                                  |          |     |   |   |       |       |
|----|--------|----------------------------------|----------|-----|---|---|-------|-------|
| 94 | R9AP-B | R9AP-B Western ray 39739-1-1     | MG063715 | 254 | M | * | 21.0  | 46.2  |
| 95 | R9AP-B | [ R9AP-B Eastern ray 23740-1-1 ] | MG063716 | 254 | M | * | 31.2  | 4.0   |
| 96 | R9AP-B | R9AP-B Bluespot ray 37118-18-1   | MG063717 | 254 | M | * | 41.7  | 58.7  |
| 97 | R9AP-B | R9AP-B Bamboo shark 45543-9-1    | MG063718 | 255 | M | * | 59.7  | 112.8 |
| 98 | R9AP-B | R9AP-B Reef shark 612-1-1        | MG063719 | 254 | M | * | 140.0 | 213.4 |
| 99 | R9AP-B | R9AP-B Florida gar 25574-1-1     | MG063720 | 254 | M | * | 44.2  | 41.7  |

### Notes, and explanation of columns

Column 3, 'Label on Figures': Sequences are indicated '-Partial' if they included fewer than 95% of the expected residues. Entries in square brackets do not appear in phylogenies because the protein sequence was identical to another sequence included in the tree; for example, all entries for Eastern ray were omitted in favour of the identical protein sequences for Western ray.

Column 6, 'Join': An entry 'J' indicates that the sequence was manually joined from more than one contig. These joined sequences overlapped, except where indicated 'NJ' for a non-contiguous join.

Column 7: An entry 'M' indicates that the sequence started with a Met.

Column 8. An entry '\*' indicates that sequence ended with a stop codon.

Column 9: RPKM = Reads per kilobase per million mapped reads.

Column 10: RPKM-CDS = Same, but calculated across only the coding region of the transcript.

|                                                   |    |     |               |                      |                        |                |                |                 |                |              |         |         |     |          |                    |                                         |                         |                   |     |      |      |      |    |
|---------------------------------------------------|----|-----|---------------|----------------------|------------------------|----------------|----------------|-----------------|----------------|--------------|---------|---------|-----|----------|--------------------|-----------------------------------------|-------------------------|-------------------|-----|------|------|------|----|
| GRK7 Human NP-631948                              | M  | --- | VDMGALDNLIA   | NTAYLQARKPSDCD       | ---                    | SKELORR        | -RRSLALPGL     | ---             | QGC            | -AELRQKL     | ---     | S       | --- | LNPH     | 57                 |                                         |                         |                   |     |      |      |      |    |
| GRK7 Cattle NP-776757                             | M  | --- | VDMGGLDNLIA   | NTAYLQARKSSDAD       | ---                    | SKELORR        | -RRSLMLPGP     | ---             | QSC            | -EQLRQAL     | ---     | A       | --- | TDFH     | 57                 |                                         |                         |                   |     |      |      |      |    |
| GRK7 Opossum XP-001364799                         | M  | --- | VDMGGLDNLIA   | NTAYLQARNIGDGD       | ---                    | TKEMQKR        | -RRSLALPTP     | ---             | ENC            | -TELROVL     | ---     | P       | --- | PHFE     | 57                 |                                         |                         |                   |     |      |      |      |    |
| GRK7 Tasmanian devil XP-003766156                 | M  | --- | LDGGLDNLIA    | NTAYLQAR             | ---                    | DGD            | ---            | TKEMQKR         | -RRSLALPAR     | ---          | EHC     | ---     | P   | ---      | THFE               | 53                                      |                         |                   |     |      |      |      |    |
| GRK7 Chicken XP-4266681                           | M  | --- | CDMGGLDNLIA   | NTAYLQARKSGEGD       | ---                    | TKEMQKR        | -RKSLSLPKI     | ---             | DOC            | -GEVRSQI     | ---     | A       | --- | ADVE     | 57                 |                                         |                         |                   |     |      |      |      |    |
| GRK7 Pigeon XP-005505950                          | M  | --- | CDMGGLDNLIA   | NTAYLQARKSGEGD       | ---                    | TKEMQKR        | -RKSLSLPKI     | ---             | DOC            | -GEVRSQV     | ---     | V       | --- | ADVD     | 57                 |                                         |                         |                   |     |      |      |      |    |
| GRK7 Ground-tit XP-005527115                      | M  | --- | CDMGGLDNLIA   | NTAYLQARKSGEGD       | ---                    | TKEMQKR        | -RKSLSLPKI     | ---             | EEC            | -SOHRESI     | ---     | A       | --- | GDYD     | 57                 |                                         |                         |                   |     |      |      |      |    |
| GRK7 Anole XP-003218299                           | M  | --- | CDMGGLDNLIA   | NTAYLNARKSGVD        | ---                    | AKELQKR        | -WRVLALPKI     | ---             | EEC            | -AAIKESI     | ---     | H       | --- | MDYN     | 57                 |                                         |                         |                   |     |      |      |      |    |
| GRK7 Gecko XP-015268958                           | M  | --- | CDMGGLDNLIA   | NTAYLQARKSGDAE       | ---                    | NKEIQKR        | -RKSLALPRI     | ---             | DEF            | -TELRSNI     | ---     | K       | --- | VEYE     | 57                 |                                         |                         |                   |     |      |      |      |    |
| GRK7 Xenopus NP-001120573                         | M  | --- | CDMGGLDNLIA   | NTAYLQARKNSEGD       | ---                    | AKELQKR        | -RKSLSLPPP     | ---             | DVSRKEIKETI    | ---          | H       | ---     | H   | ---      | LDYQ               | 58                                      |                         |                   |     |      |      |      |    |
| GRK7 Nanorana XP-018415869                        | M  | --- | CDMGGLDNLIA   | NTAYLQARKSSEGD       | ---                    | LRELQKR        | -RKSLSLPPT     | ---             | DVCRKEIKDI     | ---          | P       | ---     | V   | ---      | VDFQ               | 58                                      |                         |                   |     |      |      |      |    |
| GRK7 Florida gar 30401-2-1                        | M  | --- | CDMGGLDNLIA   | NTAYLQARKSGDGD       | ---                    | TKEMQKR        | -RRSLSLPKP     | ---             | EOC            | -VELRQKI     | ---     | E       | --- | MNFE     | 57                 |                                         |                         |                   |     |      |      |      |    |
| GRK7 Bowfin 27257-5-2                             | M  | --- | CDMGGLDNLIA   | NTAYLQARKSGDGD       | ---                    | GKEMQKR        | -RRSLALPKI     | ---             | DOC            | -AELRQNM     | ---     | D       | --- | KNFE     | 57                 |                                         |                         |                   |     |      |      |      |    |
| GRK7a Zebrafish NP-001027011                      | M  | --- | CDMGGLDNLVANT | AYLKAQGG             | ---                    | D              | ---            | DKEMKKR         | -RRSLSLPKP     | ---          | EOC     | ---     | D   | ---      | KDFE               | 54                                      |                         |                   |     |      |      |      |    |
| GRK7a Medaka NP-001098131                         | M  | --- | CDMGGLDNLVANT | AYLKAQGG             | ---                    | D              | ---            | DKEMKKR         | -RRSLSLPKP     | ---          | EOC     | ---     | E   | ---      | KDFI               | 54                                      |                         |                   |     |      |      |      |    |
| GRK7b Zebrafish NP-001028262                      | MS | --- | DMGGLKLVANT   | DYLLKAQSL            | ---                    | D              | ---            | EKEIKKR         | -RCSLGLPHL     | ---          | GNC     | ---     | S   | ---      | KGFE               | 54                                      |                         |                   |     |      |      |      |    |
| GRK7b Medaka XP-004075863                         | MS | --- | MSSSLVICLLPF  | NMHPHDSPPKAD         | ---                    | PAGLES         | LVVNTAYLKGQAG  | ---             | RNEQMR         | -RESLILPNI   | ---     | KKS     | --- | TAPRAGA  | 74                 |                                         |                         |                   |     |      |      |      |    |
| GRK7 Reef shark 15561-1-1                         | M  | --- | CDMGALDNLIA   | NTVYLQARKSVDGD       | ---                    | AKEMRKR        | -RKSLVLPNI     | ---             | QOS            | -ASVRDKI     | ---     | D       | --- | VDFE     | 57                 |                                         |                         |                   |     |      |      |      |    |
| GRK7 Bamboo shark 35291-1-1                       | M  | --- | CDMGALDNLIA   | NTVYLQARKSVDGD       | ---                    | FKEMRKR        | -RQSLALPSH     | ---             | QOS            | -ASVKONI     | ---     | D       | --- | IITYE    | 57                 |                                         |                         |                   |     |      |      |      |    |
| GRK7 Bluespot ray 37188-7-2                       | M  | --- | CDMGALDNLIA   | NTIYVQARKSIDGD       | ---                    | IKEMRKR        | -RQSLFLPSH     | ---             | AQC            | -VSVKQSI     | ---     | D       | --- | IITYE    | 57                 |                                         |                         |                   |     |      |      |      |    |
| GRK7 Western ray 39734-1-1                        | M  | --- | CDMGALDNLIA   | NTVYLQARKSVDGD       | ---                    | IKEMRKR        | -RQSLFLPNI     | ---             | AQC            | -VSVKONI     | ---     | D       | --- | VEYE     | 57                 |                                         |                         |                   |     |      |      |      |    |
| GRK7 Elephant shark XP-007891889                  | M  | --- | CDMGGLDNLIA   | NTAYLQARKSVDGD       | ---                    | IKEMQKR        | -RRSLSLPSR     | ---             | DOC            | -IELRQKI     | ---     | C       | --- | VEYE     | 57                 |                                         |                         |                   |     |      |      |      |    |
| GRK7-1 M.mordax 40500-6-1                         | M  | --- | CDMGALDNLIA   | NTAYLEARKSGDGG       | ---                    | SKEAARR        | -RRSLALPSP     | ---             | TKC            | -KSLYKSI     | ---     | K       | --- | KDSNLEYD | 60                 |                                         |                         |                   |     |      |      |      |    |
| GRK7-1 G.australis 58623-2-1w1-2                  | M  | --- | CDMGALDNLIA   | NTAYLEARKSGDGG       | ---                    | AKEMARR        | -RKSLALPPP     | ---             | AQC            | -BSLRKSA     | ---     | A       | --- | DDPSLDYQ | 60                 |                                         |                         |                   |     |      |      |      |    |
| GRK7-1 P.marinus S4RD08                           | M  | --- | CDMDCLDNLIA   | NTAYLEARKSGDGG       | ---                    | TRD            | ---            | KA              | -RRSIVLPTL     | ---          | TOC     | ---     | R   | ---      | PDSSVDYQ           | 58                                      |                         |                   |     |      |      |      |    |
| GRK7-2 Non-contig G.australis 26295-2-1w27699-1-1 | M  | --- | ---           | LIANTAYLEARKTIGDGA   | ---                    | GGGGKKR        | -RCSALPGPRGARC | ---             | AELRAIV        | ---          | RGT     | ---     | E   | ---      | ESYA               | 52                                      |                         |                   |     |      |      |      |    |
| GRK7-2 P.marinus S4RL90                           | M  | --- | CDL           | GALDNLIA             | NTAYLEARKSGDGA         | ---            | GGSGKKR        | -RCSMVLPGPRGAC  | ---            | ADMRTKV      | ---     | AGT     | --- | QTYA     | 61                 |                                         |                         |                   |     |      |      |      |    |
| GRK7-2 L.camtschaticum JL9580                     | M  | --- | ---           | L                    | GALDNLIA               | NTAYLEARKSGDGA | ---            | GGSGKKR         | -RCSMVLPGPRGAC | ---          | ADMRTKV | ---     | AGT | ---      | QTYA               | 58                                      |                         |                   |     |      |      |      |    |
| GRK7-2 E.cirrhatum 127887-1-1                     | M  | --- | CDL           | GGLDNLIA             | NTAYLQARKSTDAG         | ---            | VGG            | -SKR            | -RRSLALPSP     | ---          | AKC     | ---     | H   | ---      | LSFA               | 56                                      |                         |                   |     |      |      |      |    |
| GRK-Trimmed C.intestinalis XP-009860997           |    |     |               |                      |                        |                |                |                 |                |              |         |         |     |          |                    |                                         |                         |                   |     |      |      |      |    |
| GRK-Partial C.savignyi H2YPC9                     |    |     |               |                      |                        |                |                |                 |                |              |         |         |     |          |                    |                                         |                         |                   |     |      |      |      |    |
| GRK1X M.mordax 42166-5-1                          |    |     | MDI           | GGLET                | VVANSAYVAARGD          | VDD            | ---            | GGSGGRDR        | KMRARLKLPHV    | ---          | LOI     | ---     | E   | ---      | EARARTLALHPEPSNPS  | 68                                      |                         |                   |     |      |      |      |    |
| GRK1X G.australis 57773-1-1                       |    |     | MDI           | GGLET                | VVANSAYVAARGD          | VDDGG          | ---            | GGSGGRDR        | KMRARLKLPHV    | ---          | LRI     | ---     | E   | ---      | EVRRARVVQTHPEPAEPA | 70                                      |                         |                   |     |      |      |      |    |
| GRK1X-Partial L.camtschaticum JL8961              |    |     |               |                      |                        |                |                |                 |                |              |         |         |     |          |                    |                                         |                         |                   |     |      |      |      |    |
| GRK1B Chicken NP-990026                           |    |     | MDI           | GGLET                | VVANSAYVSARGG          | ---            | G              | ---             | PGGSARDR       | KHRARLKLPHI  | ---     | SOC     | --- | E        | ---                | ALRARLAGGGLONGV                         | AQDDGGPKODGGPKODGGKODGG | GEEH              | --- | ASFR | 92   |      |    |
| GRK1B Ground-tit XP-005533433                     |    |     | I             | GGLET                | VVANSAYVSARG           | ---            | G              | ---             | PGGGKDRR       | SARLKLPHI    | ---     | SOC     | --- | E        | ---                | ALRAQLGGAGAONG                          | ---                     | GPGAPNGAPPHTODGGD | --- | TSFR | 79   |      |    |
| GRK1B Golden eagle XP-011599401                   |    |     | MDI           | GGLET                | VVANSAYVSARG           | ---            | G              | ---             | PGASGRDR       | RQARLKLPHI   | ---     | TOC     | --- | E        | ---                | ALRARLGGGHPGGTHGAGGGGAQNGGGGGPDGVAAGGGL | ---                     | AGED              | --- | ASFR | 92   |      |    |
| GRK1B Turtle XP-006112219                         |    |     | MDI           | GGLET                | VVANSAYVSARGSDAS       | ---            | AASTLRDK       | KKMRAKLKLPHI    | ---            | TOC          | ---     | EHLKDDQ | --- | D        | ---                | ---                                     | ---                     | ---               | --- | LNFO | 59   |      |    |
| GRK1B Anole XP-003228556                          |    |     | MDI           | GGLET                | VVANSAYVSARGD          | ---            | G              | ---             | GPSTGRDK       | KKMRAKLKLPHI | ---     | TOC     | --- | EHLKDL   | ---                | D                                       | ---                     | ---               | --- | LDFN | 56   |      |    |
| GRK1B Bearded dragon XP-020665279                 |    |     | MDI           | GGLET                | VVANSAYVSARGE          | ---            | G              | ---             | GPSGRDK        | KKMRAKLKLPHI | ---     | TOC     | --- | EHLKDL   | ---                | D                                       | ---                     | ---               | --- | LSFN | 56   |      |    |
| GRK1B Spotted gar XP-006627541                    |    |     | MDI           | SGLET                | VVANSAYVTAARGSDGG      | ---            | MAATMRD        | KKMRARLKLPHI    | ---            | QVC          | ---     | D       | --- | H        | ---                | DMKATV                                  | ---                     | ---               | --- | TGFE | 59   |      |    |
| GRK1B Bowfin 26676-4-1                            |    |     | MDI           | GGLET                | VVANSAYVAARGSDGN       | ---            | AAATMRD        | KKMRARLKLPHI    | ---            | TVC          | ---     | E       | --- | H        | ---                | HMKSIV                                  | ---                     | ---               | --- | OSFE | 59   |      |    |
| GRK1B Pike XP-010901292                           |    |     | MDM           | GGLOIVANSAYVSARGSDGA | ---                    | SASAMRD        | KKFRAKLKLPHI   | ---             | TKC            | ---          | D       | ---     | --- | ---      | ---                | MMKTIIV                                 | ---                     | ---               | --- | SAFE | 59   |      |    |
| GRK1B Asian bonytongue XP-018581705               |    |     | MDI           | GGLET                | VVANSAYVSARGSLDGN      | ---            | AAATMRD        | KKMRARLKLPHI    | ---            | KQC          | ---     | E       | --- | H        | ---                | EMKTIIV                                 | ---                     | ---               | --- | SVFD | 59   |      |    |
| GRK1B Zebrafish NP-0010171711                     |    |     | MDI           | GGLET                | VVANSAYVSARGSIDGA      | ---            | AAATMRD        | KKYRSKLNLPHI    | ---            | ROC          | ---     | D       | --- | ---      | ---                | OMKTIIV                                 | ---                     | ---               | --- | TSFD | 59   |      |    |
| GRK1B Bamboo shark 26651-1-1                      |    |     | MDF           | AGLET                | VVANSAYLAARSGIDSH      | ---            | LAFAMOD        | RRMRARLKLPPV    | ---            | SOC          | ---     | Q       | --- | P        | ---                | TEGEM                                   | ---                     | ---               | --- | LTFE | 59   |      |    |
| GRK1B Bluespot ray 4032-1-1                       |    |     | MDF           | GGLET                | VVANSAYVAARSSMDAG      | ---            | SALAVRD        | KKMRARLKLPPV    | ---            | SRC          | ---     | Q       | --- | A        | ---                | LROEL                                   | ---                     | ---               | --- | CSFR | 59   |      |    |
| GRK1B Western ray 34447-1-1                       |    |     | MDF           | GGLET                | VVANSAYMAARSSMDSN      | ---            | SALTMRD        | KKMRARLKLPPV    | ---            | AQC          | ---     | D       | --- | ---      | ---                | QLRKEI                                  | ---                     | ---               | --- | LTFQ | 59   |      |    |
| GRK1A Human NP-002920                             |    |     | MDF           | GSLET                | VVANSAFIAARSGFDGS      | ---            | SSQPSR         | DKKYLAKLKLPLP   | ---            | SKC          | ---     | E       | --- | L        | ---                | LRDSL                                   | ---                     | ---               | --- | LEFE | 59   |      |    |
| GRK1A Cattle NP-776598                            |    |     | MDF           | GSLET                | VVANSAFIAARSGFDAS      | ---            | SGPASR         | DRKYLAKLKLPLP   | ---            | SKC          | ---     | E       | --- | L        | ---                | LRDSL                                   | ---                     | ---               | --- | LGFE | 59   |      |    |
| GRK1A Opossum XP-001364656                        |    |     | MDF           | GSLET                | VVANSAFIAARSGFDASGSSHL | ---            | SRDKKYF        | SKLKLPLP        | ---            | SKC          | ---     | E       | --- | L        | ---                | LRDSL                                   | ---                     | ---               | --- | LDFE | 60   |      |    |
| GRK1A Tasmanian devil XP-003765754                |    |     | MDF           | GSLET                | VVANSAFIAARSGFDASGSSHL | ---            | ARDKKYF        | SKLKLPLP        | ---            | SKC          | ---     | E       | --- | L        | ---                | LRDSL                                   | ---                     | ---               | --- | LDFE | 60   |      |    |
| GRK1A Xenopus XP-002937018                        |    |     | MDF           | GALET                | VVANSAYITARGSDGGFN     | ---            | POITRN         | KKYRARKLKLPLP   | ---            | SEC          | ---     | D       | --- | ---      | ---                | EHLKDKL                                 | ---                     | ---               | --- | LOFE | 60   |      |    |
| GRK1A Nanorana XP-018428616                       |    |     | MDF           | GALET                | VVANSAYITARGSDGGFN     | ---            | POITRN         | KKYRARKLKLPLP   | ---            | SDC          | ---     | D       | --- | ---      | ---                | EHLKDKL                                 | ---                     | ---               | --- | LEFD | 60   |      |    |
| GRK1A Florida gar 24879-1-1                       |    |     | MDI           | GGLET                | VVANSAYISARASFDGSSNA   | ---            | ANRD           | KKYRAKLKLPHI    | ---            | TOC          | ---     | D       | --- | ---      | ---                | EDLKDQL                                 | ---                     | ---               | --- | LEFD | 60   |      |    |
| GRK1A Bowfin 29529-1-1                            |    |     | MDI           | GGLET                | VVANSAYISARASFDGSSNA   | ---            | ATRD           | KKYRAKLKLPHI    | ---            | TOC          | ---     | D       | --- | ---      | ---                | EDLTKI                                  | ---                     | ---               | --- | LEFD | 60   |      |    |
| GRK1A Zebrafish NP-001029353                      |    |     | MDI           | GGLET                | VVANSAYISARGSDGTAN     | ---            | PANRD          | KKYRSKLNLPHI    | ---            | TVC          | ---     | D       | --- | ---      | ---                | EDLRETL                                 | ---                     | ---               | --- | LOFR | 60   |      |    |
| GRK1A-1 Medaka NP-001188419                       |    |     | MDI           | GGLET                | VVANSAYISARGSDGTAN     | ---            | PANRD          | KKYRSKLNLPHI    | ---            | TVC          | ---     | D       | --- | ---      | ---                | EGLRETL                                 | ---                     | ---               | --- | LGFO | 60   |      |    |
| GRK1A-2 Medaka XP-004081538                       |    |     | MDI           | GGLET                | VVANSAYINARGSDGN       | ---            | SNPAT          | ARDKKYRSKLNLPHI | ---            | TVC          | ---     | D       | --- | ---      | ---                | EGLKDL                                  | ---                     | ---               | --- | LAPD | 59   |      |    |
| GRK1A Reef shark 53758-1-1                        |    |     | MDL           | GNLET                | VVANSAYISARGSDGSAN     | ---            | LOMTRD         | KKYRAKLKLPHI    | ---            | TOC          | ---     | D       | --- | ---      | ---                | EHLKDKI                                 | ---                     | ---               | --- | VEFE | 60   |      |    |
| GRK1A Bamboo shark 8046-1-1                       |    |     | MDL           | GSLOT                | VVANSAYISARGSDGSAN     | ---            | LOMTRD         | KKYRAKLKLPHI    | ---            | TOC          | ---     | D       | --- | ---      | ---                | EHLKDKI                                 | ---                     | ---               | --- | LEFE | 60   |      |    |
| GRK1A Bluespot ray 29212-2-1                      |    |     | MDL           | GSLOT                | VVANSAYISARVTFDGPSSV   | ---            | OMTRD          | KKYRAKLKLPHI    | ---            | TOC          | ---     | D       | --- | ---      | ---                | EHLKDKI                                 | ---                     | ---               | --- | LAFE | 60   |      |    |
| GRK1A Western ray 41513-9-2                       |    |     | MDL           | GSLOT                | VVANSAYISARGSDGTAN     | ---            | OMTRD          | KKYRAKLKLPHI    | ---            | TOC          | ---     | D       | --- | ---      | ---                | EHLKDKI                                 | ---                     | ---               | --- | LEFE | 60   |      |    |
| GRK1A Elephant shark XP-007889799                 |    |     | MDI           | GGLET                | VVANSAYISARGSDGNTAN    | ---            | VMTRD          | KKYRAKLKLPHI    | ---            | TOC          | ---     | D       | --- | ---      | ---                | EHLKDKI                                 | ---                     | ---               | --- | LEFE | 60   |      |    |
| GRK C.intestinalis XP-009859302                   | M  | --- | MDME          | -LENIVANT            | VYLLKAREGGGK           | ---            | ---            | ---             | ---            | ---          | ---     | ---     | --- | ---      | ---                | ---                                     | ---                     | ---               | --- | ---  | PEYI | 57   |    |
| GRK B.floridae XP-019631688                       |    |     | ME            | -LENIVANT            | VYIKAREGGGK            | ---            | ---            | ---             | ---            | ---          | ---     | ---     | --- | ---      | ---                | ---                                     | ---                     | ---               | --- | ---  | ---  | CDYI | 54 |
| GRK B.floridae XP-002608270                       |    |     | MK            | -HEVL                | ---                    | ---            | ---            | ---             | ---            | ---          | ---     | ---     | --- | ---      | ---                | ---                                     | ---                     | ---               | --- | ---  | ---  | CDYI | 12 |
| GRK6 Human NP-002073                              |    |     | ME            | -LENIVANT            | VLLKAREGGGK            | ---            | ---            | ---             | ---            | ---          | ---     | ---     | --- | ---      | ---                | ---                                     | ---                     | ---               | --- | ---  | ---  | RDYI | 54 |
| GRK5 Human NP-005299                              |    |     | ME            | -LENIVANT            | VLLKAREGGGK            | ---            | ---            | ---             | ---            | ---          | ---     | ---     | --- | ---      | ---                | ---                                     | ---                     | ---               | --- | ---  | ---  | RDYI | 54 |
| GRK4 Human NP-892027                              |    |     | ME            | -LENIVANS            | LLLKAREGGYK            | ---            | ---            | ---             | ---            | ---          | ---     | ---     | --- | ---      | ---                | ---                                     | ---                     | ---               | --- | ---  | ---  | KDYS | 54 |

1.....10.....20.....30.....40.....50.....60.....70.....80.....90.....100.....110.....120.....

GRK7 Human NP-631948  
 GRK7 Cattle NP-776757  
 GRK7 Opossum XP-001364799  
 GRK7 Tasmanian devil XP-003766156  
 GRK7 Chicken XP-246681  
 GRK7 Pigeon XP-005505950  
 GRK7 Ground-tit XP-005527115  
 GRK7 Anole XP-003218299  
 GRK7 Gecko XP-015268958  
 GRK7 Xenopus NP-001120573  
 GRK7 Nanorana XP-018415869  
 GRK7 Florida gar 30401-2-1  
 GRK7 Bowfin 27257-5-2  
 GRK7a Zebrafish NP-001027011  
 GRK7a Medaka NP-001098131  
 GRK7b Zebrafish NP-001028262  
 GRK7b Medaka XP-004075863  
 GRK7 Reef shark 15561-1-1  
 GRK7 Bamboo shark 35291-1-1  
 GRK7 Bluespot ray 37188-7-2  
 GRK7 Western ray 39734-1-1  
 GRK7 Elephant shark XP-007891889  
 GRK7-1 M.mordax 40500-6-1  
 GRK7-1 G.australis 58623-2-1w1-2  
 GRK7-1 P.marinus S4RD08  
 GRK7-2 Non-contig G.australis 26295-2-1w27699-1-1  
 GRK7-2 P.marinus S4RL90  
 GRK7-2 L.camtschaticum JL9580  
 GRK7-2 E.cirrhatum 127887-1-1  
 GRK-Trimmed C.intestinalis XP-009860997  
 GRK-Partial C.savignyi H2YPC9  
 GRK1X M.mordax 42166-5-1  
 GRK1X G.australis 57773-1-1  
 GRK1X-Partial L.camtschaticum JL8961  
 GRK1B Chicken NP-990026  
 GRK1B Ground-tit XP-005533433  
 GRK1B Golden eagle XP-011599401  
 GRK1B Turtle XP-006112219  
 GRK1B Anole XP-003228556  
 GRK1B Bearded dragon XP-020665279  
 GRK1B Spotted gar XP-006627541  
 GRK1B Bowfin 26676-4-1  
 GRK1B Pike XP-010901292  
 GRK1B Asian bonytongue XP-018581705  
 GRK1B Zebrafish NP-001017171  
 GRK1B Bamboo shark 26651-1-1  
 GRK1B Bluespot ray 4032-1-1  
 GRK1B Western ray 34447-1-1  
 GRK1A Human NP-002920  
 GRK1A Cattle NP-776598  
 GRK1A Opossum XP-001364656  
 GRK1A Tasmanian devil XP-003765754  
 GRK1A Xenopus XP-002937018  
 GRK1A Nanorana XP-018428616  
 GRK1A Florida gar 24879-1-1  
 GRK1A Bowfin 29529-1-1  
 GRK1A Zebrafish NP-001029353  
 GRK1A-1 Medaka NP-001188419  
 GRK1A-2 Medaka NP-004081538  
 GRK1A Reef shark 53758-1-1  
 GRK1A Bamboo shark 8046-1-1  
 GRK1A Bluespot ray 29212-2-1  
 GRK1A Western ray 41513-9-2  
 GRK1A Elephant shark XP-007889799  
 GRK C.intestinalis XP-009859302  
 GRK B.floridiae XP-019631688  
 GRK B.floridiae XP-002608270  
 GRK5 Human NP-002073  
 GRK5 Human NP-005299  
 GRK4 Human NP-892027

SLCEOOPIGRRLFRDFLA-TVPRKAAATFLEDVQNWELAEEGP---TKDSALQGLVATCA-SAPAPGN--POPFLSQAVATKCOAA-----TTEEERVAAV-TLAKAEAMAFLO-EG 161  
 SLCEOOPIGRRLFRDFLA-TVPAYQEARGFLEEVQSWELAEEGP---AKGSALQGLVITCA-AAPVPGR--PHPPFSPALVTKCOAA-----TDDDRASLV-ELAKAEVMAFLO-DC 161  
 SLCEOOPIGRRLFRDFLA-TVPSYKAVDFLGEVSTWELAEEDG---TKDSTLKKLVNACA-QASAPFG--QLPFPSPALATRCQVA-----SEKHEASLV-GLAKAEMAFLO-DC 160  
 SMCEOOPIGRRLFRDFLA-TVPAYKVAVDFLAEVSSWELAEEGS---TKDSTLRGLVQLCA-QAIPFG--QLPFPSPALATRCQVA-----SETEHASLV-ELAKAEMAFLO-DC 155  
 SICEOOPIGKRFRDFDLE-TVPENLVARDFLEDEVSNWEL-AEDN---LKSSTMENIIVTNFL-KTGS-KN--YLSFMSSDLVSKCQAA-----HAKDEVNVV-QLARDEAKVFLR-GK 158  
 SICEOOPIGKRFRDFDLE-TVPEYLVAKGFLEDEVSNWEL-AEDN---AKTSTIMENIIVDFL-KTGS-KN--YLSFMSSDLVSKCQAA-----LAKDYENIV-QLAKEETKAFILR-DK 158  
 SICEOOPIGKRFRDFDLE-TVPEYLVARDFLEDEVSNWEL-AEDS---LKSSTMENIIVTNFL-KEGA-KN--YLSFMSSDLVSKCQAA-----AAKDYENIM-QLAKEETKVFVK-DK 158  
 AICEOOPIVGKFFGFEGLE-TVPEYLVAKEFMDEVWEL-AEDN---VKNLSLEGTIIMNYL-KNVS-NS--FLKFLSDALSNKCOQV-----SKDDFEKIV-VLSARETINTEYLK-GK 158  
 HICEOOPIGRRLFRDFEFLV-SVPEYRLASEFLDEADGWEL-AEDK---IKSSILLEGVLNMYL-KNIS-NS--YLFKFLSDLLAKKCOAA-----TKNDFEIV-FLAMEEAKAFILR-BE 158  
 SICVBOPIGRRLFRDFDLE-TVPEYKLAEEFLEEVKDWEL-EGSS---AKEQLMEKLVSRFF-KEPA-GE--SLNLFKGLDLSRIQKG-----QSKDMPLEI-MLAKKAGAFILM-DA 159  
 SICVBOPIGRRLFRDFDLE-TVPEYLVVQEFLEDEVNDWEL-EGSS---AKEQLLVLMIKRFF-KQDS-GB--RLLPCFSDLLSKRFQNA-----GABEIPFMV-LLAKDEANAYLIG-KE 159  
 NLCEOOPIGKLLFRQFTA-TVPEYQVAIDFLELNNWDL-AEST---SKDNLRQNIITTSFL-KPDS-KN--FIAMLCALAEKCKNV-----TEKDFEEVM-EKAKEETRNFLK-GK 158  
 SLCEOOPIGKLLFRQFAA-TLPPVYQVAVDFLELNNWDL-AESN---SKDNLRQNIITTSFL-KPDS-KN--FLSFLSPGLADKCOV-----TEKDFEEVT-TKAKEETRNFLK-GK 158  
 SLCEOOPIGKLLFRQFLA-SGGPECTTAAEFLLDLNEWEL-ESAA---ARDKARTNIINKFC-KEGS-KS--SLTFLTGDDVATKCAV-----SKDDFEVVM-GQVKTATKFLK-GK 156  
 LLCEOOPIGKLLFRQFLA-NLPEFKLAAEFLELDVWDL-AEGA---AKDKARONIINKFC-KPDS-KT--FLTFLSGEPAEKCKSV-----TDATFEEVVMKGVGVRFEFLK-GK 156  
 DICCEOOPIGRACFRQFLVSSPEYLAALAEFLDELNCWNL-AEAE---AKEEARLNIINKFC-KADS-KS--FLAFLETDEAEKCKAV-----SEKDFEEVVMKGVKATQKFLR-GQ 157  
 WLCELOPIGKLLFRQFLMISDPORAAAAVFLQELDDWSF-AEDA---HKEKVRQRIILAKFC-HPOS-QT--FLSYLTED-SNLCRTL-----SVKSLDEETVQKITNATKDFLK-GK 176  
 NVCEOOPIGKLLFRQFTA-TVPEYQVAVDFVNAVDFQL-AENG---AKDNLRQNIIVTNFL-KADS-KN--YLSFLSQELAAKCKDA-----AEKDVEELL-ALAOSETNIFLM-GQ 158  
 SVCEEROPIGKLLFRQFTA-TVPEYQGAVEFVNEVDVFL-AEDG---VKDNLRQNIIVTNFL-KPDS-KN--YLSFLSQDLADKCKDA-----TEKDFEELL-PMAQAEVRMFLA-GC 158  
 TVCEOOPIGKLLFRQFLA-TVPEYRVAVDFINEVSNFYL-AENG---DKNLRQNIIVTNFL-KPDS-KN--YLSFLSQELGDKCKAA-----TEKTEEELL-PLASEAKMFLK-BH 158  
 TVCEOOPIGKLLFRQFLA-TVPEYQVAVDFINEVSNFYL-AENG---VKNLRQNIIVTNFL-KPDS-KN--YLSFLSQDLVWCKTA-----AEKSEELL-ARASEAKMFLK-GQ 158  
 DVCEOOPIGKLLFRQFLA-TVPEYRGIAITFDVAVSKFEL-ADDD---GSRGGLLAVVAVFL-RAGS-VK--RLIFVSNELAAKAESS-----DANEQBAAI-FLARQEMRTFLS-GA 161  
 AVCEOOPIGKLLFRQFLA-SOPRYAGVITFDVAVTRFEL-AEDN---GSRGGLLGEALVFL-LADS-DT--KLAFVSNALAAKAASS-----DAGEREAAI-FLARQEMRTFLS-GA 161  
 SLCEAOPIGRRLFRFLEL-SOPVYSSVAADFADAAKFL-EDDG---GGGGGARGAMLEALAAFL-RRDS-GE--RPAFVSESLAATAGSS-----DAAEREAAI-ALAKREMTFLS-GA 162  
 GLCEBOPIVGRLLFRFLFAG-GVPEYRRVAFEFABEAERQFL-AEDG---AREGLAAATVAAFL-RADA-GB--FLAFVSESLAALAAVSA-----GPEBAEELV-RRAGDETRRFLT-GP 153  
 GLCEBOPIVGRLLFRFQFAG-GVPEYRAVAFEFLEAEQVQL-EDDG---AREGLAGATVAAFL-RADS-ER--SLTFLSALAAVASA-----GGREAEELV-RRAREARLFLV-GQ 162  
 GLCEBOPIVGRLLFRQFAG-GVPEYAAHAFEFLEAEQVQL-EDDG---AREGLAAATVAAFL-RADS-ER--SLTFLSALAAVASA-----GGVEEELV-RRAREARLFLV-GQ 159  
 SECEBOPIGRLLFRHFCN-SVAEYSRALAFLDQVVELEL-AEDN---MONALLCKIVADFL-QPDS-EN--SLSFLSDAMTSAASGA-----SEVDMKELV-PRAOQETROFLM-GK 157

RVCNLEPIGRLLFRQFLD-TQKEFRPAGQLLQACEDMDM-SEDS---EKPEAAKQIVAEHMGDKNA-AS--FCPFLSAAAASARAN-----GS-----F-ABALAEITLHLR-AH 164  
 RVCNLEPIGRLLFRQFLD-TNHEFRPAGQLLQACEDMDM-SEES---EKPKRAQIAVAHMDKKNP-SS--FCAPLSAAAABARAR-----GS-----F-DETLAETAEYLR-SR 166  
 -----MBAARAR-----GS-----F-ABALAEITLHLR-SR 24  
 WQCVBOPIGKLLFRQFLA-ATPGLAAAGALWEELEAFEC-CEEG---ERSAAAAIRKRFV-TEGG-AE--HCAFLSAAAAPPAD-----GAPDD--F-EPTRRELLAHLE-GT 190  
 WQCVBOPIVGGKLLFRFLE-GAPFEAAAAGALWSEIEAFER-CEDA---EREASAKRLRSRFF-TPGG-SE--HCGFLSAAAAPPAGT-----MPGDA--F-AQARRELLAHLE-AA 178  
 WQCVBOPIGKLLFRQFLA-GAPFLAAAAGALWAEIAYER-CEEA---ERSGAAAATVRRFF-TPGG-AE--HCFSLSAAAAPPAGE-----APPDT--F-GAARRELLAHLE-AV 190  
 SICLRBOPIGKLLFRQFLA-DGAFKAAAAGLWKSMEEYAA-SEEN---ERTOKAQTIVNQFF-DSAS-KT--FCSELEKVVVMRKED-----AKHGRADLF-KESEQHLKHLK-DC 160  
 FICVROPIGKLLFRQFLA-ETDEFKAAAGLWKSIEEDYNT-SEEA---DRPKVAQSVNKYF-DSAS-KE--FCSELEKATMRVKED-----AKNGRADLF-KESEQHLKLYLE-AN 157  
 FICVROPIGKLLFRQFLA-ETDEFKAAAGLWKSIEEYNT-SEEP---ERPKAQAQSVNKYF-DSAS-KE--FCSELEKATMRVKED-----KKGHGDLF-KESEQHLKHLK-ER 157  
 NMCIROPIGKLLFRQFLA-SEAFKTAGTLWKDIEDYNT-AEEK---DRPKAQAQSVNKYF-DSAS-KT--FCGFLSEKATMRVKED-----HKNGRDLF-KESEQHLKHLK-BA 160  
 VMCIKMPOPIGKLLFRQFLA-SEDLKTAGNLWKDIEDYNT-AEEK---DRAKQAQSVNKYF-DSAS-KN--FCSELEKATMRVKED-----HKNRADLF-KESEQHLKHLK-NK 160  
 SMCVROPIGKLLFRQFLA-SEATHKNAELWKMDEEYNT-AQET---DRMOKAQAQSVNKYF-ESQS-KN--FCGFLSEKATMRVKED-----HKNRADLF-KESEQHLKHLK-AK 160  
 SMCVROPIGKLLFRQFLA-DDAVHKASAGELWKDIEDYNT-AQEK---DRLQKAQAQSVNKYF-DSAS-KN--FCSELEKATMRVKED-----HKNVGRDLF-KESEQHLKHLK-AT 160  
 SMCVROPIGKLLFRQFLA-SEADYKNPVLDWKDIEDYIV-AQEN---DRAKQAQAQSVNKYF-ESSS-KN--FCDFLQKAVSRVKED-----FKNIRGDLF-KESEQHLVHLK-AK 160  
 SICCOPIVGGKLLFRQHLR-STEQFKMAAGLWQVMEDYNSRLEEA---EHIPLALITVHOYV-DPDS-RD--FCSELEDAIARVHEV-----ARLGKDLF-RESEQLLSYLE-AQ 161  
 SICROPIGKLLFRQFLA-ASTCFHMAASLWQVVEEYGT-MEES---GRVPKAQAQSVNKYF-EPSS-RD--FCSELEDEKTVLRVKED-----HPNGHALF-RESEQLLLAYLE-AQ 160  
 SICROPIGKLLFRQFLA-GSGHFQVAARLWQDMEDYST-MEEF---GRVAKAQAQSVNKYF-ESGS-RE--FCSELEDEKTVLRVKED-----QNGGHALF-RESEQLLSYLE-SQ 160  
 SMCVBOPIGKLLFRQFLA-SAEKHLPALELWKDIEDYNT-ADND---LQPKQAQILQAYL-DPQA-KL--FCSELEDEGIVAKFKEG-----PVETQDGLF-QPLQATLAHLG-GA 160  
 GMCLBOPIGKLLFRQFLA-THECHGPALELWKDIEDYNT-ADDA---LRPKQAQALRAAYL-EPQA-QL--FCSELEDAETVARARAG-----AGDGLF-QPLRAVLAHLG-AQ 157  
 NICSBOPIGKLLFRQFLK-SIQHVPVAVELWRDIEDYNT-ADND---FRLQKAQAAILANYL-DPKA-KL--FCSELEDEGIVAKFKEG-----HSSIFNGLF-QPLQATLAHLG-GA 161  
 NICSBOPIGKLLFRQFLK-NEEQHVPVAVELWRDIEDYNT-ADND---FRLQKAQAAILANYL-DPNA-KL--FCSELEDEGIVAKFKEG-----HSSIFNGLF-QPLQATLAHLG-GA 161  
 NICVROPIGKLLFRQFLA-SAE-FTHIVEIWNIDIEDYV-AEDE---DRLYKARGIINKYV-DSDS-KQ--FCHYLDEKAIKVVOD-----CNKVNMLF-QPLHKSATLDYLK-EN 160  
 NICVROPIGKLLFRQFLA-TVQFVPALEIWDIEDYV-AEDE---DRLQKAVGIINKYV-ETHS-KY--FCTYLDKAIKVVOD-----CNKVPDGLF-KELLOSLLDYLK-EN 161  
 SICCOBOPIGKLLFRQFLA-TVPOYKPAKLLWKDIEDYNT-AEDK---DRVQKASKIISRYM-ESDA-KQ--FCSELEGSTISKVKEE-----HOMAKDDL-FVESLEGLTAFILR-DL 161  
 SICNBOPIGKLLFRQFLA-TVPEYKPAKLLWKDIEDYNT-AEDK---DRVQKASKIISRYM-VSTA-KH--YCSFLEQNTIVKVEE-----HOMAKDDL-FVESLEGLTAFILR-DL 161  
 SICVBOPIGKLLFRQFLA-TVPEYKGPCLRWDRVVEEYNT-AEDK---DRTQKAAKILQRYM-EPBA-KH--FCFPLENGITKVKER-----HQAEDDLF-VETLACVDFDLK-EV 161  
 TVCVOPIGKLLFRQFLA-SINEYKGPCLRWDRVVEEYNT-AEDE---DRAKKAQKILQRYM-EPDA-KH--YCPFLPENGITKVKER-----HKAEDDLF-SETMDSVMDFLK-EV 161  
 SMCVBOPIGKLLFRQFLA-ANQYHGACRLWKDIEDYNT-AEDS---ERAKKASKIIVQRYM-DPBA-KH--FCFPLEDITAKVKN-----LEVVGDDL-AAAALAKTLDYLR-BA 160  
 NICKBOPIGKLLFRQFLA-TVAAAYKPAVELWKGIEDYNT-AEDE---DRLQIAQSIIISKFL-ESGA-EF--FCSELEKSTISRAKED-----YKNVREDLF-KECKEATVFKLKEG-AK 162  
 SICVROPIGKLLFRQFLA-SVAEYKPAVELWKAIEVYNT-AEDE---DRLEKARNIIISKFL-ESGA-EL--FCTYLDKSTISRAKED-----CENVREDLF-RECKEATVFKLKEG-AK 162  
 SICIROPIGKLLFRQFLA-TLADYKPAVELWKGIEDYNT-AEDE---ERVQKAQIIISKYL-ETGA-EL--FCSELEDEKSTISRAKED-----CENVREDLF-RECKEATVFKLKEG-AK 161  
 SICVROPIGKLLFRQFLA-TVAEYKPAVELWKGIEDYNT-AEDE---ERIQKARDIISKYL-ESGA-EL--FCSELEDEKSTISRAKED-----CENVREDLF-RECKEATVFKLKEG-AK 161  
 SICVROPIGKLLFRQFLA-SVAEYKPAVELWKGIEDYNT-LEDE---DRVQKAQIIISKYL-ESGT-KL--YCSFLEKSTISRAKED-----YKNVREDLF-RECKEATVFKLKEG-AK 161  
 SICEDBOPIGKLLFRQFLA-TQSELSIICRECLQMRNVEE-ILLE---DRVQKAQIIISKYL-KERT--SNGVLPPTVNMEDIDAEERLKAPEECDEBEL-----NQDFF-SESSSATNIFLM-GQ 168  
 SICEKBOPIGKLLFRQFLA-KDDKLNRCICFLNKVEEFV-TDDD---NRKDAQ--IISKFL-ESSE-PD--VLGDIISSETISCRETIORYTPEOCESLQETPSKVVDF--NOCRESEVSKYLS-GE 168  
 SVCEBOPIGKLLFRQFLA-KDAKLNRCICFLNKV-TDDD---NRKDAQ--IISKFL-ESSE-PD--VLGDIISSETISCRETIORYTPEOCESLQETPSKVVDF--NOCRESEVSKYLS-GE 101  
 SLCEBOPIGKLLFRQFLA-TREPESRCVAFLDGVAEYEV-TPDD---KRAKCGKELTQNFL-SHFG-PD--LIPVAGDOLVNTCQR-----L-BOGPKDLF-QBLRSLTHEYLS-VA 156  
 SLCDKBOPIGKLLFRQFLA-TREPESRCVAFLDGVAEYEV-TPDE---KRAKCGKELTQNFL-TPKS-PV--FIAVAGDOLVNTCQR-----L-LQKPKDLF-SACAQSLTHEYLS-VA 156  
 SLCDKBOPIGKLLFRQFLA-TKPTLKRHIIFLDVAEYEV-ADDE---DRSDCGLSILDRFF-NDKL-AA--FLPHIIPDDVVEECLG-----LKBENCKKAF-BECTRVAHNYLR-GE 157

..130.....140.....150.....160.....170.....180.....190.....200.....210.....220.....230.....240.....250

GRK7 Human NP-631948 PFKDFV-LSAFYDKFLQWKLFEMQPVSDKYFTEFRVLKGGGFGF ---VCAVOVNTGKMYACKKLDKRRLLKKGGEKMALEKEILEKVNSSPFVSLAYAFESKTHLCLVMSLMNGGDLRFHYI 281
GRK7 Cattle NP-776757 PPREFL-ASPFYDKFLQWKVFEMQPVSDKYFEEFRVLKGGGFGF ---VCAVOVNTGKMYACKKLDKRRLLKKGGEKMALEKEILEKVNSSPFVSLAYAFESKSHLCLVMSLMNGGDLRFHYI 281
GRK7 Opossum XP-001364799 PFODFO-ASPFYDKFLQWKAFEQPITKDYFEEFRVLKGGGFGF ---VCAVOVNTGKMYACKKLDKRRLLKKGGEKMALEKEILEKVNSSPFVSLAYAFESKSHLCLVMSLMNGGDLRFHYI 280
GRK7 Tasmanian devil XP-003766156 PFODFO-ASPFYDKFLQWKAFEQPITKDYFEEFRVLKGGGFGF ---VCAVOVNTGKMYACKKLDKRRLLKKGGEKMALEKEILEKVNSSPFVSLAYAFESKSHLCLVMSLMNGGDLRFHYI 275
GRK7 Chicken XP-426681 PFODFO-ASPFYDKFLQWKAFEQPITKDYFEEFRVLKGGGFGF ---VCAVOVNTGKMYACKKLDKRRLLKKGGEKMALEKEILEKVNSSPFVSLAYAFESKTHLCLVMSLMNGGDLRFHYI 278
GRK7 Pigeon XP-005505950 PFODFO-TSPLFDKFLQWKVFEMQPVTEKYFEEFRVLKGGGFGF ---VCAVOVNTGKMYACKKLDKRRLLKKGGEKMALEKEILEKVNSSPFVSLAYAFESKSHLCLVMSLMNGGDLRFHYI 278
GRK7 Ground-tit XP-005527115 PFODFO-NSPFYDKFLQWKVFEMQPVTEKYFEEFRVLKGGGFGF ---VCAVOVNTGKMYACKKLDKRRLLKKGGEKMALEKEILEKVNSSPFVSLAYAFESKTHLCLVMSLMNGGDLRFHYI 278
GRK7 Anole XP-003218299 PFODFO-TSPPFDKFLQWKVFEMQPVTEKYFEEFRVLKGGGFGF ---VCAVOVNTGKMYACKKLDKRRLLKKGGEKMALEKEILEKVNSSPFVSLAYAFESKSHLCLVMSLMNGGDLRFHYI 278
GRK7 Gecko XP-015268958 PFEEFO-KSQYFEKFLQWKAFEQPISERHFEEFRVLKGGGFGF ---VCAVOVNTGKMYACKKLDKRRLLKKGGEKMALEKEILEKVNSSPFVSLAYAFESKTHLCLVMSLMNGGDLRFHYI 278
GRK7 Xenopus NP-001120573 PFODFO-NSSFYDKFLQWKAFERQITDKYFEEFRVLKGGGFGF ---VCAVOVNTGKMYACKKLDKRRLLKKGGEKMALEKEILEKVNSSPFVSLAYAFESKSHLCLVMSLMNGGDLRFHYI 279
GRK7 Nanorana XP-018415869 PFAYQ-NSDYFDFLQWKAFERQITDKYFEEFRVLKGGGFGF ---VCAVOVNTGKMYACKKLDKRRLLKKGGEKMALEKEILEKVNSSPFVSLAYAFESKTHLCLVMSLMNGGDLRFHYI 279
GRK7 Florida gar 30401-2-1 AFDEYO-NSPFFERFLRWKVFERQITEKYFEEFRVLKGGGFGF ---VCAVOVNTGKMYACKKLDKRRLLKKGGEKMALEKEILEKVNSSPFVSLAYAFESKSHLCLVMSLMNGGDLRFHYI 278
GRK7 Bowfin 27257-5-2 AFEEYO-NSPFFERFLRWKVFERQITEKYFEEFRVLKGGGFGF ---VCAVOVNTGKMYACKKLDKRRLLKKGGEKMALEKEILEKVNSSPFVSLAYAFESKSHLCLVMSLMNGGDLRFHYI 278
GRK7a Zebrafish NP-001027011 PFTEYO-ASPFYDKFLQWKVFEMQPVTEKYFEEFRVLKGGGFGF ---VCAVOVNTGKMYACKKLDKRRLLKKGGEKMALEKEILEKVNSSPFVSLAYAFESKSHLCLVMSLMNGGDLRFHYI 276
GRK7a Medaka NP-001098131 PFTEYO-TSPPFDKFLQWKVFEMQPVTEKYFEEFRVLKGGGFGF ---VCAVOVNTGKMYACKKLDKRRLLKKGGEKMALEKEILEKVNSSPFVSLAYAFESKSHLCLVMSLMNGGDLRFHYI 276
GRK7b Zebrafish NP-001028262 PFEEYO-GLSFFDFLQWKVFEMQPVTEKYFEEFRVLKGGGFGF ---VCAVOVNTGKMYACKKLDKRRLLKKGGEKMALEKEILEKVNSSPFVSLAYAFESKSHLCLVMSLMNGGDLRFHYI 277
GRK7b Medaka XP-004075863 PFLEYL-KSPHFYRFLQWKVFEMQPVTEKYFEEFRVLKGGGFGF ---VCAVOVNTGKMYACKKLDKRRLLKKGGEKMALEKEILEKVNSSPFVSLAYAFESKSHLCLVMSLMNGGDLRFHYI 296
GRK7 Reef shark 15561-1-1 PFODFO-NSPFFSKFLQWKVFEMQPVTEKYFEEFRVLKGGGFGF ---VCAVOVNTGKMYACKKLDKRRLLKKGGEKMALEKEILEKVNSSPFVSLAYAFESKSHLCLVMSLMNGGDLRFHYI 278
GRK7 Bamboo shark 35291-1-1 PFODFO-NSPFFTKFLQWKVFEMQPVTEKYFEEFRVLKGGGFGF ---VCAVOVNTGKMYACKKLDKRRLLKKGGEKMALEKEILEKVNSSPFVSLAYAFESKSHLCLVMSLMNGGDLRFHYI 278
GRK7 Bluespot ray 37188-7-2 AFODFL-NSPFFEMFLQWKVFEMQPVTEKYFEEFRVLKGGGFGF ---VCAVOVNTGKMYACKKLDKRRLLKKGGEKMALEKEILEKVNSSPFVSLAYAFESKSHLCLVMSLMNGGDLRFHYI 278
GRK7 Western ray 39734-1-1 AFODFL-NSPFFDKFLQWKVFEMQPVTEKYFEEFRVLKGGGFGF ---VCAVOVNTGKMYACKKLDKRRLLKKGGEKMALEKEILEKVNSSPFVSLAYAFESKSHLCLVMSLMNGGDLRFHYI 278
GRK7 Elephant shark XP-007891889 PFODFO-NSPFFDKFLQWKVFEMQPVTEKYFEEFRVLKGGGFGF ---VCAVOVNTGKMYACKKLDKRRLLKKGGEKMALEKEILEKVNSSPFVSLAYAFESKSHLCLVMSLMNGGDLRFHYI 278
GRK7-1 M.mordax 40500-6-1 VFHEFL-QSAYEKFLQWKVFEMQPVTEKYFEEFRVLKGGGFGF ---VCAVOVNTGKMYACKKLDKRRLLKKGGEKMALEKEILEKVNSSPFVSLAYAFESKSHLCLVMSLMNGGDLRFHYI 281
GRK7-1 G.australis 58623-2-1w1-2 AFREFI-NSASVEKFLQWKVFEMQPVTEKYFEEFRVLKGGGFGF ---VCAVOVNTGKMYACKKLDKRRLLKKGGEKMALEKEILEKVNSSPFVSLAYAFESKSHLCLVMSLMNGGDLRFHYI 281
GRK7-1 P.marinus S4RD08 PFRG-D-NFRYYRCLAWKTRDRTEVMQKSYFPHLKGSKTPHSECTCFVCAVOVNTGKMYACKKLDKRRLLKKGGEKMALEKEILEKVNSSPFVSLAYAFESKSHLCLVMSLMNGGDLRFHYI 285
GRK7-2 Non-contig G.australis 26295-2-1w27699-1-1 PFCEFL-ASPFYDKFLQWKVFEMQPVTEKYFEEFRVLKGGGFGF ---VCAVOVNTGKMYACKKLDKRRLLKKGGEKMALEKEILEKVNSSPFVSLAYAFESKSHLCLVMSLMNGGDLRFHYI 273
GRK7-2 P.marinus S4RL90 PFREFL-ASPFYDKFLQWKVFEMQPVTEKYFEEFRVLKGGGFGF ---VCAVOVNTGKMYACKKLDKRRLLKKGGEKMALEKEILEKVNSSPFVSLAYAFESKSHLCLVMSLMNGGDLRFHYI 282
GRK7-2 L.camtschaticum JL9580 PFCEFL-ASPFYDKFLQWKVFEMQPVTEKYFEEFRVLKGGGFGF ---VCAVOVNTGKMYACKKLDKRRLLKKGGEKMALEKEILEKVNSSPFVSLAYAFESKSHLCLVMSLMNGGDLRFHYI 279
GRK7-2 E.cirrhatum 127887-1-1 PFREYL-ESPFYDKFLQWKVFEMQPVTEKYFEEFRVLKGGGFGF ---VCAVOVNTGKMYACKKLDKRRLLKKGGEKMALEKEILEKVNSSPFVSLAYAFESKSHLCLVMSLMNGGDLRFHYI 277
GRK-Trimmed C.intestinalis XP-009860997 -----LKGKGFGE -----VYAVOVNTGKMYACKKLDKRRLLKKGGEKMALEKEILEKVNSSPFVSLAYAFESKSHLCLVMSLMNGGDLRFHYI 281
GRK-Partial C.savignyi H2YPC9 -----MAYACKIDKKMKKQHAESVVMSEKITLEAVNSPFVSLTYAYENKNNLNLVMTLMGADLRFHYI 66
GRK1X M.mordax 42166-5-1 ALAKYV-GSPHYLRFLQFKWLEMQPMGEWDFRVLKGGGFGF ---VCACOMKATGKLYANCKLKKRLLKKGGEKMALEKEILEKVNSSPFVSLAYAFESKSHLCLVMSLMNGGDLRFHYI 284
GRK1X G.australis 57773-1-1 SLAEYA-ESPRYLRLFLQFKWLEMQPMGEWDFRVLKGGGFGF ---VCACOMKATGKLYANCKLKKRLLKKGGEKMALEKEILEKVNSSPFVSLAYAFESKSHLCLVMSLMNGGDLRFHYI 286
GRK1X-Partial L.camtschaticum JL8961 SLAEYV-ESPRYLRLFLQFKWLEMQPMGEWDFRVLKGGGFGF ---VCACOMKATGKLYANCKLKKRLLKKGGEKMALEKEILEKVNSSPFVSLAYAFESKSHLCLVMSLMNGGDLRFHYI 144
GRK1B Chicken NP-990026 AWAPYL-SSPYFGRFLQFKWLEMQPMGEWDFRVLKGGGFGF ---VCACORRATGKMYANCKLKKRLLKKGGEKMALEKEILEKVNSSPFVSLAYAFESKSHLCLVMSLMNGGDLRFHYI 310
GRK1B Ground-tit XP-005533433 AWAPYL-ASPFYDKFLQWKVFEMQPVTEKYFEEFRVLKGGGFGF ---VCAVOVNTGKMYACKKLDKRRLLKKGGEKMALEKEILEKVNSSPFVSLAYAFESKSHLCLVMSLMNGGDLRFHYI 298
GRK1B Golden eagle XP-011599401 AWTPYR-ASPFYDKFLQWKVFEMQPVTEKYFEEFRVLKGGGFGF ---VCAVOVNTGKMYACKKLDKRRLLKKGGEKMALEKEILEKVNSSPFVSLAYAFESKSHLCLVMSLMNGGDLRFHYI 310
GRK1B Turtle XP-006112219 ALAKYK-DSLFYRFLQFKWLEMQPMGEWDFRVLKGGGFGF ---VCACOMRATGKLYANCKLKKRLLKKGGEKMALEKEILEKVNSSPFVSLAYAFESKSHLCLVMSLMNGGDLRFHYI 280
GRK1B Anole XP-003228556 UMAKYK-ESLHFRFLQFKWLEMQPMGEWDFRVLKGGGFGF ---VCACOMKATGKMYANCKLKKRLLKKGGEKMALEKEILEKVNSSPFVSLAYAFESKSHLCLVMSLMNGGDLRFHYI 277
GRK1B Bearded dragon XP-020665279 ALGKYK-ESLHFRFLQFKWLEMQPMGEWDFRVLKGGGFGF ---VCACOMKATGKMYANCKLKKRLLKKGGEKMALEKEILEKVNSSPFVSLAYAFESKSHLCLVMSLMNGGDLRFHYI 277
GRK1B Spotted gar XP-006627541 ALEGRF-GSLYFLRFLQFKWLEMQPMGEWDFRVLKGGGFGF ---VHACOMKATGKLYANCKLKKRLLKKGGEKMALEKEILEKVNSSPFVSLAYAFESKSHLCLVMSLMNGGDLRFHYI 280
GRK1B Bowfin 26676-4-1 ALEGRF-GSLYFLRFLQFKWLEMQPMGEWDFRVLKGGGFGF ---VHACOMKATGKLYANCKLKKRLLKKGGEKMALEKEILEKVNSSPFVSLAYAFESKSHLCLVMSLMNGGDLRFHYI 280
GRK1B Pike XP-010901292 ALEGRF-GSLYFLRFLQFKWLEMQPMGEWDFRVLKGGGFGF ---VHACOMKATGKLYANCKLKKRLLKKGGEKMALEKEILEKVNSSPFVSLAYAFESKSHLCLVMSLMNGGDLRFHYI 280
GRK1B Asian bonytongue XP-018581705 AVGGRF-DSIFFLRFLQFKWLEMQPMGEWDFRVLKGGGFGF ---VHACOMKATGKLYANCKLKKRLLKKGGEKMALEKEILEKVNSSPFVSLAYAFESKSHLCLVMSLMNGGDLRFHYI 280
GRK1B Zebrafish NP-001017171 ALTGFK-DSIFFLRFLQFKWLEMQPMGEWDFRVLKGGGFGF ---VHACOMKATGKLYANCKLKKRLLKKGGEKMALEKEILEKVNSSPFVSLAYAFESKSHLCLVMSLMNGGDLRFHYI 280
GRK1B Bamboo shark 26651-1-1 AFEGYK-TSOFYRFLQFKWLEMQPMGEWDFRVLKGGGFGF ---VCACOMRATGKLYANCKLKKRLLKKGGEKMALEKEILEKVNSSPFVSLAYAFESKSHLCLVMSLMNGGDLRFHYI 281
GRK1B Bluespot ray 4032-1-1 AAESYK-ESTFYLRLFLQFKWLEMQPMGEWDFRVLKGGGFGF ---VCACOMRATGKLYANCKLKKRLLKKGGEKMALEKEILEKVNSSPFVSLAYAFESKSHLCLVMSLMNGGDLRFHYI 280
GRK1B Western ray 34447-1-1 ATEGYK-ASAPFLRFLQFKWLEMQPMGEWDFRVLKGGGFGF ---VCACOMRATGKLYANCKLKKRLLKKGGEKMALEKEILEKVNSSPFVSLAYAFESKSHLCLVMSLMNGGDLRFHYI 280
GRK1A Human NP-002920 PFCEYL-GSLYFLRFLQFKWLEMQPMGEWDFRVLKGGGFGF ---VHACOMKATGKLYANCKLKKRLLKKGGEKMALEKEILEKVNSSPFVSLAYAFESKSHLCLVMSLMNGGDLRFHYI 277
GRK1A Cattle NP-776598 PFCEYL-GSLYFLRFLQFKWLEMQPMGEWDFRVLKGGGFGF ---VHACOMKATGKLYANCKLKKRLLKKGGEKMALEKEILEKVNSSPFVSLAYAFESKSHLCLVMSLMNGGDLRFHYI 280
GRK1A Opossum XP-001364656 PFKEYL-ESLHFRFLQFKWLEMQPMGEWDFRVLKGGGFGF ---VHACOMKATGKLYANCKLKKRLLKKGGEKMALEKEILEKVNSSPFVSLAYAFESKSHLCLVMSLMNGGDLRFHYI 281
GRK1A Tasmanian devil XP-003765754 PFREYL-ESLHFRFLQFKWLEMQPMGEWDFRVLKGGGFGF ---VHACOMKATGKLYANCKLKKRLLKKGGEKMALEKEILEKVNSSPFVSLAYAFESKSHLCLVMSLMNGGDLRFHYI 281
GRK1A Xenopus XP-002937018 AFAOYK-ESKYFDFLQFKWLEMQPMGEWDFRVLKGGGFGF ---VHACOMKATGKLYANCKLKKRLLKKGGEKMALEKEILEKVNSSPFVSLAYAFESKSHLCLVMSLMNGGDLRFHYI 280
GRK1A Nanorana XP-018428616 AFSOYK-EGKIFSRFLQFKWLEMQPMGEWDFRVLKGGGFGF ---VHACOMKATGKLYANCKLKKRLLKKGGEKMALEKEILEKVNSSPFVSLAYAFESKSHLCLVMSLMNGGDLRFHYI 281
GRK1A Florida gar 24879-1-1 PFTNYL-ETMYLKRFLQFKWLEMQPMGEWDFRVLKGGGFGF ---VHACOMKATGKLYANCKLKKRLLKKGGEKMALEKEILEKVNSSPFVSLAYAFESKSHLCLVMSLMNGGDLRFHYI 281
GRK1A Bowfin 29529-1-1 PFSNYK-ETMYLKRFLQFKWLEMQPMGEWDFRVLKGGGFGF ---VHACOMKATGKLYANCKLKKRLLKKGGEKMALEKEILEKVNSSPFVSLAYAFESKSHLCLVMSLMNGGDLRFHYI 281
GRK1A Zebrafish NP-001029353 PFTFYL-ETMYLKRFLQFKWLEMQPMGEWDFRVLKGGGFGF ---VHACOMKATGKLYANCKLKKRLLKKGGEKMALEKEILEKVNSSPFVSLAYAFESKSHLCLVMSLMNGGDLRFHYI 281
GRK1A-1 Medaka NP-001188419 PVTFFL-ESMYLKRFLQFKWLEMQPMGEWDFRVLKGGGFGF ---VHACOMKATGKLYANCKLKKRLLKKGGEKMALEKEILEKVNSSPFVSLAYAFESKSHLCLVMSLMNGGDLRFHYI 281
GRK1A-2 Medaka NP-004081538 PVTFFL-ESMYLKRFLQFKWLEMQPMGEWDFRVLKGGGFGF ---VHACOMKATGKLYANCKLKKRLLKKGGEKMALEKEILEKVNSSPFVSLAYAFESKSHLCLVMSLMNGGDLRFHYI 280
GRK1A Reef shark 53758-1-1 AFEHYK-ESMHFRFLQFKWLEMQPMGEWDFRVLKGGGFGF ---VHACOMKATGKLYANCKLKKRLLKKGGEKMALEKEILEKVNSSPFVSLAYAFESKSHLCLVMSLMNGGDLRFHYI 282
GRK1A Bamboo shark 8046-1-1 PFELYK-ESMYFMRFLQFKWLEMQPMGEWDFRVLKGGGFGF ---VHACOMKATGKLYANCKLKKRLLKKGGEKMALEKEILEKVNSSPFVSLAYAFESKSHLCLVMSLMNGGDLRFHYI 282
GRK1A Bluespot ray 29212-2-1 PFAYYK-ESMYFMRFLQFKWLEMQPMGEWDFRVLKGGGFGF ---VHACOMKATGKLYANCKLKKRLLKKGGEKMALEKEILEKVNSSPFVSLAYAFESKSHLCLVMSLMNGGDLRFHYI 281
GRK1A Western ray 41513-9-2 PFEGYK-ESMYFMRFLQFKWLEMQPMGEWDFRVLKGGGFGF ---VHACOMKATGKLYANCKLKKRLLKKGGEKMALEKEILEKVNSSPFVSLAYAFESKSHLCLVMSLMNGGDLRFHYI 281
GRK1A Elephant shark XP-007889799 PFENYK-ESMYFDRFLQFKWLEMQPMGEWDFRVLKGGGFGF ---VHACOMKATGKLYANCKLKKRLLKKGGEKMALEKEILEKVNSSPFVSLAYAFESKSHLCLVMSLMNGGDLRFHYI 281
GRK C.intestinalis XP-009859302 PFKEPC-DSIFYRFLQFKWLEMQPMGEWDFRVLKGGGFGF ---VHACOMKATGKLYANCKLKKRLLKKGGEKMALEKEILEKVNSSPFVSLAYAFESKSHLCLVMSLMNGGDLRFHYI 288
GRK B.floridiae XP-019631688 PFENFREDKIYFSRFLQFKWLEMQPMGEWDFRVLKGGGFGF ---VHACOMKATGKLYANCKLKKRLLKKGGEKMALEKEILEKVNSSPFVSLAYAFESKSHLCLVMSLMNGGDLRFHYI 289
GRK B.floridae XP-002608270 PFENFREDKIYFSRFLQFKWLEMQPMGEWDFRVLKGGGFGF ---VHACOMKATGKLYANCKLKKRLLKKGGEKMALEKEILEKVNSSPFVSLAYAFESKSHLCLVMSLMNGGDLRFHYI 282
GRK6 Human NP-002073 PFADYL-DSIFYRFLQFKWLEMQPMGEWDFRVLKGGGFGF ---VHACOMKATGKLYANCKLKKRLLKKGGEKMALEKEILEKVNSSPFVSLAYAFESKSHLCLVMSLMNGGDLRFHYI 276
GRK5 Human NP-005299 PFHEYL-DSMFYRFLQFKWLEMQPMGEWDFRVLKGGGFGF ---VHACOMKATGKLYANCKLKKRLLKKGGEKMALEKEILEKVNSSPFVSLAYAFESKSHLCLVMSLMNGGDLRFHYI 276
GRK4 Human NP-892027 PFEEYO-ESSYFDFLQFKWLEMQPMGEWDFRVLKGGGFGF ---VHACOMKATGKLYANCKLKKRLLKKGGEKMALEKEILEKVNSSPFVSLAYAFESKSHLCLVMSLMNGGDLRFHYI 277

.....260.....270.....280.....290.....300.....310.....320.....330.....340.....350.....360.....370.....





|                                                   |                                    |                       |         |                              |                                        |     |
|---------------------------------------------------|------------------------------------|-----------------------|---------|------------------------------|----------------------------------------|-----|
| GRK7_Human NP-631948                              | KEKVSKEKDLKQRTLEDEVKFOHNFTEBAK     | ---DICRFLFLAKKPEORLGS | ---REKS | ---DDPRKHFFFKTINFRLEAGLI     | ---EPPFVDPDPVVYAKDIAEIDDFSEVRGVEFDKDK  | 501 |
| GRK7_Cattle NP-776757                             | KEKVSKEKDLKQRTLEKEVRFQHSNFTTEBAK   | ---DICRFLFLAKTPEORLGS | ---REKS | ---DDPRKHFFFKTINFRLEAGLV     | ---EPPFVDPDPVVYAKDINEIDDFSEVRGVEFDKDK  | 501 |
| GRK7_Opossum XP-001364799                         | KEKVSKEKDLKQRTLEQEVKFOHEGFTTEBAK   | ---DICRFLFLAKKAEORLGS | ---ROEG | ---DDPRKHAFPTQINFRLEAGLV     | ---EPPFVDPDPVVYAKDIAEIDDFSEIKGVEFDKDK  | 500 |
| GRK7_Tasmanian devil XP-003766156                 | MEKVSKEKDLKQRTLEKEVVFQHSNFTTEBAK   | ---DVCRFLFLAKRAEORLGS | ---REVG | ---DDPRKHFFFKTINFRLEAGLV     | ---EPPFVDPDPVVYAKDIDVIEDDFSEIKGVEFDKDK | 495 |
| GRK7_Chicken XP-246681                            | KEKVDKDEVKRRRTLEDEVKFEHANFTTEBK    | ---DICRFLFLAKKPEORLGS | ---RSED | ---DDPRKHFFFKTINFRLEAGLI     | ---DPPFVDPDPVVYAKDVIADDFSEIRGIEFDKDK   | 497 |
| GRK7_Pigeon XP-005505950                          | KEKVGKDEVKRRRTLEDEVKFEHANFTTEBAK   | ---DICRFLFLAKKPEORLGS | ---RNEG | ---DDPRKHFFFKTINFRLEAGLI     | ---DPPFVDPDPVVYAKDVIADDFSEIRGIEFDKDK   | 497 |
| GRK7_Ground-tit XP-005527115                      | KEKVNKDEVKRRRTLEDEVKFEHANFTTEBAK   | ---DICKLFLAKKEDRGLG   | ---RNED | ---DDPRKHFFFKTINFRLEAGLI     | ---DPPFVDPDPVVYAKDVIADDFSEIRGIEFDKDK   | 497 |
| GRK7_Anole XP-003218299                           | KEKVNKDEVKRRRTLEDDPKYEHKDFDEPTK    | ---NICRFLFLAKKPEORLGS | ---RSND | ---DDPRKHFFFKTINFRLEAGLI     | ---DPPFVDPDPVVYAKDVIADDFSEIRGIEFDKDK   | 497 |
| GRK7_Gecko XP-015268958                           | KEKISKEKDLKRRRTLEDEVKFEHSGFDEAAK   | ---DICRMLFLAKKVENRGLG | ---RSAN | ---DDPRKHFFFKTINFRLEAGLV     | ---DPPFVDPDPVVYAKDVIADDFSEIRGIEFDKDK   | 498 |
| GRK7_Xenopus NP-001120573                         | KDKTSKEKDLKRRRTLEDEVGFOHNFTEBAK    | ---DICRFLFLAKKPEORLGS | ---RTND | ---DDPRKHFFFKTINFRLEAGMV     | ---DPPFVDPDPVVYAKDIDVIEDDFSEIKGVEFDKDK | 498 |
| GRK7_Nanorana XP-018415869                        | KEKTKKDEVKRRRTLEDEVKFEHNFTEBAK     | ---DICKLFLAKKPEORLGS  | ---RTND | ---DDPRKHFFFKTINFRLEAGMV     | ---DPPFVDPDPVVYAKDVIADDFSEIRGIEFDKDK   | 497 |
| GRK7_Florida gar 30401-2-1                        | KEKMNKDEVKRRRTLEEVKYDHPKDFDELTK    | ---DICKQFLMKKVEDRGLG  | ---RGTH | ---DDPRKHAFVFKTINFRLEAGLI    | ---DPPFVDPDPVVYAKDVIADDFSEIRGIEFDKDK   | 497 |
| GRK7_Bowfin 27257-5-2                             | KEKVNKDEVKRRRTLEDEVKFEHNFTEBAK     | ---DICKQFLMKKVEDRGLG  | ---RGAS | ---DDPRKHFFFKTINFRLEAGLI     | ---DPPFVDPDPVVYAKDVIADDFSEIRGIEFDKDK   | 497 |
| GRK7a_Zebrafish NP-001027011                      | KEKVKKEVRRRTLEDEVKFEHNFTEBAK       | ---DIIKQFLKKNIDERLGC  | ---K--N | ---DDPRKHFFFKTINFRLEAGLI     | ---DPPWPKPNVVYAKDIDVIEDDFSEIKGVEFDKDK  | 496 |
| GRK7a_Medaka NP-001098131                         | KEKVKKEVRRRTLEDEVKFEHNFTEBAK       | ---DIIKQFLKKNIDERLGC  | ---RNMN | ---DDPRKHFFFKTINFRLEAGLV     | ---DPPWPKPNVVYAKDIDVIEDDFSEIKGVEFDKDK  | 504 |
| GRK7b_Zebrafish NP-001028262                      | KEKVKKEVRRRTLEDEVKFEHNFTEBAK       | ---DIIKQFLKKNIDERLGC  | ---K--N | ---DDPRKHFFFKTINFRLEAGLI     | ---DPPWPKPNVVYAKDIDVIEDDFSEIKGVEFDKDK  | 493 |
| GRK7b_Medaka XP-004075863                         | REKVNQTEVTRRTLEDDCKEFDKDFDSPK      | ---EIIVQFLRKKVAHRLGC  | ---RK-G | ---DDPRKHFFFKTINFRLEAGLV     | ---EPPWPKPNVVYAKDIDVIEDDFSEIKGVEFDKDK  | 514 |
| GRK7_Reef shark 15561-1-1                         | KEKVNKDEVKRRRTLEDEVKFEHNFTEBAK     | ---DICKLFLAKKPEORLGS  | ---RGEN | ---DDPRKHFFFKTINFRLEAGLV     | ---DPPFVDPDPVVYAKDVIADDFSEIRGIEFDKDK   | 497 |
| GRK7_Bamboo shark 35291-1-1                       | KEKVSKEKDLKRRRTLEDEVKFEHNFTEBAK    | ---DICKLFLAKKPEORLGS  | ---RGEN | ---DDPRKHFFFKTINFRLEAGLV     | ---EPPFVDPDPVVYAKDVIADDFSEIRGIEFDKDK   | 497 |
| GRK7_Bluespot ray 37188-7-2                       | KEKVSKEKDLKRRRTLEDEVKFEHNFTEBAK    | ---DICKLFLAKKPEORLGS  | ---RGEN | ---DDPRKHFFFKTINFRLEAGLV     | ---EPPFVDPDPVVYAKDVIADDFSEIRGIEFDKDK   | 497 |
| GRK7_Western ray 39734-1-1                        | KEKVSKEKDLKRRRTLEDEVKFEHNFTEBAK    | ---DICKLFLAKKPEORLGS  | ---RGEN | ---DDPRKHFFFKTINFRLEAGLV     | ---EPPFVDPDPVVYAKDVIADDFSEIRGIEFDKDK   | 497 |
| GRK7_Elephant shark XP-007891889                  | KEKVSKEKDLKRRRTLEDEVKFEHNFTEBAK    | ---DICKLFLAKKPEORLGS  | ---RQEC | ---DDPRKHFFFKTINFRLEAGLV     | ---DPPFVDPDPVVYAKDVIADDFSEIRGIEFDKDK   | 497 |
| GRK7-1_M.mordax 40500-6-1                         | KEKVNKDEVKRRRTLEDEVKFEHNFTEBAK     | ---DICKLFLAKKPEORLGS  | ---RGDD | ---DDPRKHFFFKTINFRLEAGLV     | ---EPPFVDPDPVVYAKDVIADDFSEIRGIEFDKDK   | 501 |
| GRK7-1_G.australis 58623-2-1w1-2                  | KEKVAKEVRRRTLEEDNVAYFHRNFTEBAK     | ---SICDQLLAKKPADRLGC  | ---RGDD | ---DNPKRHPYFOSINFRLEAGLV     | ---NPPFVDPDPVVYAKDVIADDFSEIRGIEFDKDK   | 501 |
| GRK7-1_P.marinus S4RD08                           | KEKVAKEVRRRTLEEDNVAYFHRNFTEBAK     | ---SICDQLLAKKPADRLGC  | ---RGDD | ---DNPKRHPYFOSINFRLEAGLV     | ---NPPFVDPDPVVYAKDVIADDFSEIRGIEFDKDK   | 505 |
| GRK7-2_Non-contig G.australis 26295-2-1w27699-1-1 | REKVSKEVRRRTLEDAVAFTHPAFTDESR      | ---DLCALMLAKKAEORLGC  | ---RGPD | ---DNPKRHPYFOSINFRLEAGLV     | ---EPPFVDPDPVVYAKDVIADDFSEIRGIEFDKDK   | 493 |
| GRK7-2_P.marinus S4RL90                           | REKVSKEVRRRTLEDAVAFTHPAFTDESR      | ---DLCALMLAKKAEORLGC  | ---RGPD | ---DNPKRHPYFOSINFRLEAGLV     | ---EPPFVDPDPVVYAKDVIADDFSEIRGIEFDKDK   | 502 |
| GRK7-2_L.camtschaticum JL9580                     | REKVSKEVRRRTLEDAVAFTHPAFTDESR      | ---DLCALMLAKKAEORLGC  | ---RGPD | ---DNPKRHPYFOSINFRLEAGLV     | ---EPPFVDPDPVVYAKDVIADDFSEIRGIEFDKDK   | 499 |
| GRK7-2_E.cirrhatum 127887-1-1                     | HEQVSKKEELRRRVLQDKVVFVTKIAFTAETAQ  | ---DLCTQLLAKKACDRGLG  | ---RNPV | ---DDPRKHFFFKTINFRLEAGLV     | ---EPPFVDPDPVVYAKDVIADDFSEIRGIEFDKDK   | 497 |
| GRK-Trimmed C.intestinalis XP-009860997           | KGKNNRKKCVSTAEKTTINE-KHKFKKTHEPSLV | DLIDKLVKVEDRGLG       | ---DEKS | ---AEAKRHPYFADLNWERLEAGVT    | ---PPFVDPDPVVYAKDVIADDFSEIRGIEFDKDK    | 311 |
| GRK-Partial C.savignyi H2YPC9                     | KGKNNRKKCVSTAEKTTINE-KHKFKKTHEPSLV | DLIDKLVKVEDRGLG       | ---DEKS | ---AEAKRHPYFADLNWERLEAGVT    | ---PPFVDPDPVVYAKDVIADDFSEIRGIEFDKDK    | 240 |
| GRK1X_M.mordax 42166-5-1                          | GEKVENKEVRRRTLEDEVKFEHNFTEBAK      | ---DICEALLAKDPAKRLGF  | ---RDGS | ---CNEKLLKHHFFAAMWGRLEAGLV   | ---EPPFVDPDPVVYAKDVIADDFSEIRGIEFDKDK   | 506 |
| GRK1X_G.australis 57773-1-1                       | GEKVENKEVRRRTLEDEVKFEHNFTEBAK      | ---DICEALLAKDPAKRLGF  | ---RDGS | ---CNEKLLKHHFFAAMWGRLEAGLV   | ---EPPFVDPDPVVYAKDVIADDFSEIRGIEFDKDK   | 508 |
| GRK1X-Partial L.camtschaticum JL8961              | GDEVNKEVRRRTLEDEVKFEHNFTEBAK       | ---DICEALLAKDPAKRLGF  | ---RDGS | ---CNEKLLKHHFFAAMWGRLEAGLV   | ---EPPFVDPDPVVYAKDVIADDFSEIRGIEFDKDK   | 366 |
| GRK1B_Chicken NP-990026                           | GEKVEKKEVTRRTLEDDSVYSYS-ERFSAASR   | ---SLCEGLLAKDPAKRLGF  | ---RDGN | ---CAMLRKQPVFFSALHWGSW-SGPP  | ---PPFVDPDPVVYAKDVIADDFSEIRGIEFDKDK    | 531 |
| GRK1B_Ground-tit XP-005533433                     | GEKVENKEVTRRTLEDDSVYSYS-ERFSAASR   | ---SLCEGLLAKDPAKRLGF  | ---RDND | ---CAOLKAHPFFFKTINFRLEAGLV   | ---PPFVDPDPVVYAKDVIADDFSEIRGIEFDKDK    | 519 |
| GRK1B_Golden eagle XP-011599401                   | GEKVENKEVTRRTLEDDSVYSYS-ERFSAASR   | ---SLCEGLLAKDPAKRLGF  | ---REND | ---CAOLKAHPFFFKTINFRLEAGLV   | ---PPFVDPDPVVYAKDVIADDFSEIRGIEFDKDK    | 532 |
| GRK1B_Turtle XP-006112219                         | GEKVENKEVTRRTLEDDSVYSYS-ERFSAASR   | ---SLCEGLLAKDPAKRLGF  | ---RNDQ | ---CAOLKAHPFFFKTINFRLEAGLV   | ---EPPFVDPDPVVYAKDVIADDFSEIRGIEFDKDK   | 502 |
| GRK1B_Anole XP-003228556                          | REKVENKEVTRRTLEDDSVYSYS-ERFSAASR   | ---SLCEGLLAKDPAKRLGF  | ---KNNE | ---CDELKNAHFFFKTINFRLEAGLV   | ---EPPFVDPDPVVYAKDVIADDFSEIRGIEFDKDK   | 500 |
| GRK1B_Bearded dragon XP-020665279                 | GEKVENKEVTRRTLEDDSVYSYS-ERFSAASR   | ---SLCEGLLAKDPAKRLGF  | ---KNNA | ---CDELKNAHFFFKTINFRLEAGLV   | ---EPPFVDPDPVVYAKDVIADDFSEIRGIEFDKDK   | 499 |
| GRK1B_Spotted gar XP-006627541                    | GEKVKELNKEVTRRTLEDDSVYSYS-ERFSAASR | ---ALCEGLLAKDPAKRLGF  | ---RNGE | ---CAELKQHPFFFKTINFRLEAGLV   | ---DPPFVDPDPVVYAKDVIADDFSEIRGIEFDKDK   | 502 |
| GRK1B_Bowfin 26676-4-1                            | GEKVENKEVTRRTLEDDSVYSYS-ERFSAASR   | ---ALCEGLLAKDPAKRLGF  | ---KNNE | ---CAELKQHPFFFKTINFRLEAGLV   | ---DPPFVDPDPVVYAKDVIADDFSEIRGIEFDKDK   | 502 |
| GRK1B_Pike XP-010901292                           | GEKVENKEVTRRTLEDDSVYSYS-ERFSAASR   | ---ALCEGLLAKDPAKRLGF  | ---KNNE | ---CAELKQHPFFFKTINFRLEAGLV   | ---DPPFVDPDPVVYAKDVIADDFSEIRGIEFDKDK   | 502 |
| GRK1B_Asian bonytongue XP-018581705               | GEKVDNNEVTRRTLEDDSVYSYS-ERFSAASR   | ---ALCEGLLAKDPAKRLGF  | ---KNNS | ---CDEMNKQFFFKTINFRLEAGLV    | ---EPPFVDPDPVVYAKDVIADDFSEIRGIEFDKDK   | 502 |
| GRK1B_Zebrafish NP-001017171                      | GEKVDNNEVTRRTLEDDSVYSYS-ERFSAASR   | ---ALCEGLLAKDPAKRLGF  | ---KNNE | ---CAELKQHPFFFKTINFRLEAGLV   | ---EPPFVDPDPVVYAKDVIADDFSEIRGIEFDKDK   | 502 |
| GRK1B_Bamboo shark 26651-1-1                      | GEKVEPQEVSRRTLEDDSVYSYS-ERFSAASR   | ---ALCEGLLAKDPAKRLGF  | ---KLG  | ---CSEVKTIRFFFKTINFRLEAGLV   | ---EPPFVDPDPVVYAKDVIADDFSEIRGIEFDKDK   | 503 |
| GRK1B_Bluespot ray 4032-1-1                       | GEKVENKEVTRRTLEDDSVYSYS-ERFSAASR   | ---ALCEGLLAKDPAKRLGF  | ---KNGN | ---CSEVKNQFFFKTINFRLEAGLV    | ---EPPFVDPDPVVYAKDVIADDFSEIRGIEFDKDK   | 502 |
| GRK1B_Western ray 34447-1-1                       | GEKVENKEVTRRTLEDDSVYSYS-ERFSAASR   | ---ALCEGLLAKDPAKRLGF  | ---KDGH | ---CSEVKNQFFFKTINFRLEAGLV    | ---EPPFVDPDPVVYAKDVIADDFSEIRGIEFDKDK   | 502 |
| GRK1A_Human NP-002920                             | GEKVENKEVTRRTLEDDSVYSYS-ERFSAASR   | ---ALCEGLLAKDPAKRLGF  | ---RDET | ---CDKLRHAPFFFKTINFRLEAGLV   | ---EPPFVDPDPVVYAKDVIADDFSEIRGIEFDKDK   | 502 |
| GRK1A_Cattle NP-776598                            | GEKVENKEVTRRTLEDDSVYSYS-ERFSAASR   | ---ALCEGLLAKDPAKRLGF  | ---RDGS | ---CDGLRTHPFFFKTINFRLEAGLV   | ---EPPFVDPDPVVYAKDVIADDFSEIRGIEFDKDK   | 499 |
| GRK1A_Opossum XP-001364656                        | GEKVENKEVTRRTLEDDSVYSYS-ERFSAASR   | ---ALCEGLLAKDPAKRLGF  | ---KNGN | ---CDELKNAHFFFKTINFRLEAGLV   | ---EPPFVDPDPVVYAKDVIADDFSEIRGIEFDKDK   | 503 |
| GRK1A_Tasmanian devil XP-003765754                | GEKVENKEVTRRTLEDDSVYSYS-ERFSAASR   | ---ALCEGLLAKDPAKRLGF  | ---KNGN | ---CDELKNAHFFFKTINFRLEAGLV   | ---EPPFVDPDPVVYAKDVIADDFSEIRGIEFDKDK   | 503 |
| GRK1A_Xenopus XP-002937018                        | GEKVENKEVTRRTLEDDSVYSYS-ERFSAASR   | ---ALCEGLLAKDPAKRLGF  | ---KNGN | ---CDELKNAHFFFKTINFRLEAGLV   | ---EPPFVDPDPVVYAKDVIADDFSEIRGIEFDKDK   | 502 |
| GRK1A_Nanorana XP-018428616                       | GEKVENKEVTRRTLEDDSVYSYS-ERFSAASR   | ---ALCEGLLAKDPAKRLGF  | ---RNGN | ---CNDLRVHFFFKTINFRLEAGLV    | ---EPPFVDPDPVVYAKDVIADDFSEIRGIEFDKDK   | 503 |
| GRK1A_Florida gar 24879-1-1                       | GEKVENKEVTRRTLEDDSVYSYS-ERFSAASR   | ---ALCEGLLAKDPAKRLGF  | ---KNGN | ---CDELKNAHFFFKTINFRLEAGLV   | ---EPPFVDPDPVVYAKDVIADDFSEIRGIEFDKDK   | 503 |
| GRK1A_Bowfin 29529-1-1                            | GEKVENKEVTRRTLEDDSVYSYS-ERFSAASR   | ---ALCEGLLAKDPAKRLGF  | ---KNGN | ---CDELKNAHFFFKTINFRLEAGLV   | ---EPPFVDPDPVVYAKDVIADDFSEIRGIEFDKDK   | 503 |
| GRK1A_Zebrafish NP-001029353                      | GEKVENKEVTRRTLEDDSVYSYS-ERFSAASR   | ---ALCEGLLAKDPAKRLGF  | ---KNGT | ---CDEIRTHPFFFKTINFRLEAGLV   | ---EPPFVDPDPVVYAKDVIADDFSEIRGIEFDKDK   | 503 |
| GRK1A-1_Medaka NP-001188419                       | GEKVENKEVTRRTLEDDSVYSYS-ERFSAASR   | ---ALCEGLLAKDPAKRLGF  | ---KNGS | ---CDELKNAHFFFKTINFRLEAGLV   | ---EPPFVDPDPVVYAKDVIADDFSEIRGIEFDKDK   | 503 |
| GRK1A-2_Medaka XP-004081538                       | GEKVENKEVTRRTLEDDSVYSYS-ERFSAASR   | ---ALCEGLLAKDPAKRLGF  | ---KNGC | ---CDEIRTHPFFFKTINFRLEAGLV   | ---EPPFVDPDPVVYAKDVIADDFSEIRGIEFDKDK   | 504 |
| GRK1A_Reef shark 53758-1-1                        | GEHVENKEVTRRTLEDDSVYSYS-ERFSAASR   | ---LFCEALLAKDPAKRLGF  | ---KNGS | ---CDEIRTHPFFFKTINFRLEAGLV   | ---EPPFVDPDPVVYAKDVIADDFSEIRGIEFDKDK   | 502 |
| GRK1A_Bamboo shark 8046-1-1                       | GEHVENKEVTRRTLEDDSVYSYS-ERFSAASR   | ---LFCEALLAKDPAKRLGF  | ---KNGC | ---CDEIRTHPFFFKTINFRLEAGLV   | ---EPPFVDPDPVVYAKDVIADDFSEIRGIEFDKDK   | 504 |
| GRK1A_Bluespot ray 29212-2-1                      | GEHVENKEVTRRTLEDDSVYSYS-ERFSAASR   | ---LFCEALLAKDPAKRLGF  | ---RND  | ---CDELKNAHFFFKTINFRLEAGLV   | ---EPPFVDPDPVVYAKDVIADDFSEIRGIEFDKDK   | 503 |
| GRK1A_Western ray 41513-9-2                       | GEHVENKEVTRRTLEDDSVYSYS-ERFSAASR   | ---LFCEALLAKDPAKRLGF  | ---RNEC | ---CEELKAHVFFFKTINFRLEAGLV   | ---EPPFVDPDPVVYAKDVIADDFSEIRGIEFDKDK   | 503 |
| GRK1A_Elephant shark XP-007889799                 | GEHVENKEVTRRTLEDDSVYSYS-ERFSAASR   | ---LFCEALLAKDPAKRLGF  | ---KNGN | ---CDELKNAHFFFKTINFRLEAGLV   | ---EPPFVDPDPVVYAKDVIADDFSEIRGIEFDKDK   | 503 |
| GRK_C.intestinalis XP-009859302                   | KEKVKREEVDRRVKEDTETY-SDFSEBAK      | ---SICSMALLKDDVDRGLG  | ---KNGS | ---CAGSDVKAHPFFFKTINFRLEAGLV | ---EPPFVDPDPVVYAKDVIADDFSEIRGIEFDKDK   | 507 |
| GRK_B.floridiae XP-019631688                      | KEKVKREEVDRRVKEDTETY-SDFSEBAK      | ---SICSMALLKDDVDRGLG  | ---KNGS | ---CAGSDVKAHPFFFKTINFRLEAGLV | ---EPPFVDPDPVVYAKDVIADDFSEIRGIEFDKDK   | 512 |
| GRK_B.floridiae XP-002608270                      | KEKVKREEVDRRVKEDTETY-SDFSEBAK      | ---SICSMALLKDDVDRGLG  | ---KNGS | ---CAGSDVKAHPFFFKTINFRLEAGLV | ---EPPFVDPDPVVYAKDVIADDFSEIRGIEFDKDK   | 445 |
| GRK6_Human NP-002073                              | KKKIKREEVDRRVKEDTETY-SDFSEBAK      | ---SICSMALLKDDVDRGLG  | ---RGS  | ---AREVKRHPFFFKTINFRLEAGLV   | ---EPPFVDPDPVVYAKDVIADDFSEIRGIEFDKDK   | 495 |
| GRK5_Human NP-005299                              | KEKVKREEVDRRVKEDTETY-SDFSEBAK      | ---SICSMALLKDDVDRGLG  | ---QEBG | ---AAEVKRHPFFFKTINFRLEAGLV   | ---DPPFVDPDPVVYAKDVIADDFSEIRGIEFDKDK   | 495 |
| GRK4_Human NP-892027                              | KEKVKREEVDRRVKEDTETY-SDFSEBAK      | ---SICSMALLKDDVDRGLG  | ---RBE  | ---AAGVKRHPFFFKTINFRLEAGLV   | ---EPPFVDPDPVVYAKDVIADDFSEIRGIEFDKDK   | 496 |

.....510.....520.....530.....540.....550.....560.....570.....580.....590.....600.....610.....620.....

|                                                   |                                                                                  |           |     |
|---------------------------------------------------|----------------------------------------------------------------------------------|-----------|-----|
| GRK7 Human NP-631948                              | KOFFKNFATGAVPIAWQEEIIEETGLFEEELNDPNRPAGC--EEGN-SS--                              | KSGVCLLL  | 553 |
| GRK7 Cattle NP-776757                             | KOFFQRFATGAVPIAWQEEIIEETGPFALNDPNRPAGC--GEG--SS--                                | RSGVCLLL  | 552 |
| GRK7 Opossum XP-001364799                         | RKFFKFKFATGAVPIAWQEEIIEETGLFEEELNDPNRLSGC--FNGSQSS--                             | KSGVCLLL  | 553 |
| GRK7 Tasmanian devil XP-003766156                 | RKFFKFKFATGAVPIAWQEEIIEETGLFEEELNDPNRSLGC--VNDST--TS--                           | KSGVCLLL  | 546 |
| GRK7 Chicken XP-4266681                           | KKFFKFKFATGAVSIPWQEEIIEETGLFEEELNDPNRVDSGG--YANGGE-A-                            | KSGVCLLL  | 551 |
| GRK7 Pigeon XP-005505950                          | KKFFKFKFATGAVPIAWQEEIIEETGLFEEELNDPNRVDSGG--YANGGE-A-                            | KSGVCLLL  | 551 |
| GRK7 Ground-tit XP-005527115                      | KKFFKFKFATGAVPIAWQEEIIEETGLFEEELNDPNRVDSGG--YANGGE-A-                            | KSGVCLLL  | 551 |
| GRK7 Anole XP-003218299                           | KKFFKFKFATGAVPIAWQEEIIEETGLFEEELNDPNRVDSGG--E-E-                                 | KSGVCLLL  | 545 |
| GRK7 Gecko XP-015268958                           | NKFFKFKFATGAVSIPWQEEIIEETGLFEEELNDPNRVDSGG--G                                    | KSAVCLLL  | 546 |
| GRK7 Xenopus NP-001120573                         | AKFFKFKFATGAVSIPWQEEIIEETGLFEEELNDPNRVDSGG--GGGNSGE-                             | KSGVCSII  | 551 |
| GRK7 Nanorana XP-018415869                        | AKFFKFKFATGAVSIPWQEEIIEETGLFEEELNDPNRVDSGG--TYGDGGEK-                            | KSGVCSII  | 552 |
| GRK7 Florida gar 30401-2-1                        | KKFFKFKFATGAVSIPWQEEIIEETGLFEEELNDPNRVDSGG--GINS-E-E-                            | RSGVCLLL  | 550 |
| GRK7 Bowfin 27257-5-2                             | KKFFKFKFATGAVSIPWQEEIIEETGLFEEELNDPNRVDSGG--GGGSGE-E-                            | KSGVCLLL  | 551 |
| GRK7a Zebrafish NP-001027011                      | DKFFKFKFATGAVSIPWQEEIIEETGLFEEELNDPNRVDSGG--GSD-D-K-                             | KSGVCLLL  | 549 |
| GRK7a Medaka NP-001098131                         | DKFFKFKFATGAVSIPWQEEIIEETGLFEEELNDPNRVDSGG--GDD-D-K-                             | KSGVCLLL  | 557 |
| GRK7b Zebrafish NP-001028262                      | EKFFKFKFATGAVSIPWQEEIIEETGLFEEELNDPNRVDSGG--GLEDEEQG-                            | KSKVCLLL  | 548 |
| GRK7b Medaka XP-004075863                         | EKFFKFKFATGAVSIPWQEEIIEETGLFEEELNDPNRVDSGG--KTV---W-                             | ISRMCITL  | 565 |
| GRK7 Reef shark 15561-1-1                         | NQFFKFKFATGAVSIPWQEEIIEETGLFEEELNDPNRVDSGG--NMGANGSGE-                           | AKSGVCLL  | 555 |
| GRK7 Bamboo shark 35291-1-1                       | KQFFKFKFATGAVSIPWQEEIIEETGLFEEELNDPNRVDSGG--GDIANGSGE-                           | AKSGVCLL  | 552 |
| GRK7 Bluespot ray 37188-7-2                       | KQFFKFKFATGAVSIPWQEEIIEETGLFEEELNDPNRVDSGG--AVIQNGSDE-                           | AKSGVCLL  | 554 |
| GRK7 Western ray 39734-1-1                        | KQFFKFKFATGAVSIPWQEEIIEETGLFEEELNDPNRVDSGG--GMLANGTEE-                           | AKSGVCLL  | 554 |
| GRK7 Elephant shark XP-007891889                  | KKFFKFKFATGAVSIPWQEEIIEETGLFEEELNDPNRVDSGG--GFSANGSDE-                           | AKSGVCLL  | 554 |
| GRK7-1 M.mordax 40500-6-1                         | KQFFKFKFATGAVSIPWQEEIIEETGLFEEELNDPNRVDSGG--DKPTKNGT-                            | PSSTCVLL  | 553 |
| GRK7-1 G.australis 58623-2-1w1-2                  | QVFFKFKFATGAVSIPWQEEIIEETGLFEEELNDPNRVDSGG--KTKTNGS-                             | KSSTCVLL  | 556 |
| GRK7-1 P.marinus S4RD08                           | QVFFKFKFATGAVSIPWQEEIIEETGLFEEELNDPNRVDSGG--KGMNSGN-                             | RSSCTVLL  | 560 |
| GRK7-2 Non-contig G.australis 26295-2-1w27699-1-1 | RGFFARFATGAVSIPWQEEIIEETGLFEEELNDPNRVDSGG--                                      |           | 516 |
| GRK7-2 P.marinus S4RL90                           | RGFFARFATGAVSIPWQEEIIEETGLFEEELNDPNRVDSGG--GDVNGDVG-                             | RKSGVCHLL | 559 |
| GRK7-2 L.camtschaticum JL9580                     | RGFFARFATGAVSIPWQEEIIEETGLFEEELNDPNRVDSGG--GDVNGDVG-                             | RKSGVCHLL | 556 |
| GRK7-2 E.cirrhatum 127887-1-1                     | LKFHKEFATGCVPLTWQEEIIEETGLFEEELNDPNRVDSGG--GNSE-                                 | RRSGVCLL  | 549 |
| GRK-Trimmed C.intestinalis XP-009860997           | LDFFHKEFATGCVPLTWQEEIIEETGLFEEELNDPNRVDSGG--VDSKSKSK-                            | VCALL     | 364 |
| GRK-Partial C.savignyi H2YPC9                     |                                                                                  |           | 240 |
| GRK1X M.mordax 42166-5-1                          | KDFYDSFSTGSIPIPWQEEIIEETGVFGLNLWVWGGDGLP--NDLCKDKLPTSEAGSG                       | RSSACTVL  | 569 |
| GRK1X G.australis 57773-1-1                       | KDFYDSFSTGSIPIPWQEEIIEETGVFGLNLWVWGGDGLP--DDLCKDKLPTSEAGSG                       | RSSACTVL  | 571 |
| GRK1X-Partial L.camtschaticum JL8961              | KAFYDSFSTGSIPIPWQEEIIEETGVFGLNLWVWGGDGLP--DDLCKDKLPTSEAGSG                       | RSSACTVL  | 429 |
| GRK1B Chicken NP-990026                           | AALCDAFASGTVSIPWQEEIIEETGVFGLNLWVWGGDGLP--PDLDPAEPPG--GGGT                       | RSAICGVL  | 593 |
| GRK1B Ground-tit XP-005533433                     | AALCDAFASGTVSIPWQEEIIEETGVFGLNLWVWGGDGLP--PDLDPAEPPG--GGGT                       | RSAICGVL  | 580 |
| GRK1B Golden eagle XP-011599401                   | AALCDAFASGTVSIPWQEEIIEETGVFGLNLWVWGGDGLP--PDLDPAEPPG--GGGT                       | RSAICGVL  | 592 |
| GRK1B Turtle XP-006112219                         | KAFYDFSSGNIPWQEEIIEETGVFGLNLWVWGGDGLP--RDLDHTM-PAN-SVSS                          | KSGVCLLL  | 563 |
| GRK1B Anole XP-003228556                          | KAFYDFSSGNIPWQEEIIEETGVFGLNLWVWGGDGLP--RDLDHTM-PAN-SVSS                          | KSGVCLLL  | 561 |
| GRK1B Bearded dragon XP-020665279                 | KAFYDFSSGNIPWQEEIIEETGVFGLNLWVWGGDGLP--RDLDHTM-PAN-SVSS                          | KSGVCLLL  | 561 |
| GRK1B Spotted gar XP-006627541                    | KAFYDFSSGNIPWQEEIIEETGVFGLNLWVWGGDGLP--NDLNPNY-VPP-AESA                          | KSGVCLLL  | 563 |
| GRK1B Bowfin 26676-4-1                            | KAFYDFSSGNIPWQEEIIEETGVFGLNLWVWGGDGLP--NDLNPNY-VPP-AESA                          | KSGVCLLL  | 561 |
| GRK1B Pike XP-010901292                           | NEFYDFSSGNIPWQEEIIEETGVFGLNLWVWGGDGLP--DDLDPNK-IP--VA                            | KGGACVLL  | 560 |
| GRK1B Asian bonytongue XP-018581705               | TEFFDFSSGNIPWQEEIIEETGVFGLNLWVWGGDGLP--DDLDPNK-IP--VA                            | KGGACVLL  | 559 |
| GRK1B Zebrafish NP-001017711                      | DEFYDFSSGNIPWQEEIIEETGVFGLNLWVWGGDGLP--DDLDPNK-IP--VA                            | KGGACVLL  | 559 |
| GRK1B Bamboo shark 26651-1-1                      | QQFYKFEFASGKMAIPWQEEIIEETGVFGLNLWVWGGDGLP--SD--GEDPARE                           | KSGVCLLL  | 559 |
| GRK1B Bluespot ray 4032-1-1                       | KDFYDFSSGNIPWQEEIIEETGVFGLNLWVWGGDGLP--DE--BEDSARR                               | KSGVCLLL  | 558 |
| GRK1B Pike 34447-1-1                              | KDFYDFSSGNIPWQEEIIEETGVFGLNLWVWGGDGLP--DE--BEDSARR                               | KSGVCLLL  | 558 |
| GRK1A Human NP-002920                             | TEFFDFSSGNIPWQEEIIEETGVFGLNLWVWGGDGLP--DDMKGIS--GGG--SSSS                        | KSGMCLVS  | 563 |
| GRK1A Cattle NP-776598                            | TEFFDFSSGNIPWQEEIIEETGVFGLNLWVWGGDGLP--DDMKGIS--GGG--SSSS                        | KSGMCLVS  | 561 |
| GRK1A Opossum XP-001364656                        | TEFFDFSSGNIPWQEEIIEETGVFGLNLWVWGGDGLP--DDMKGIS--GGG--SSSS                        | KSGMCLVS  | 565 |
| GRK1A Tasmanian devil XP-003765754                | TEFFDFSSGNIPWQEEIIEETGVFGLNLWVWGGDGLP--DDMKGIS--GGG--SSSS                        | KSGMCLVS  | 565 |
| GRK1A Xenopus XP-002937018                        | NKLFDFSSGNIPWQEEIIEETGVFGLNLWVWGGDGLP--SELNENNVRRES-IVN-DNSA                     | KSGVCLLL  | 559 |
| GRK1A Nanorana XP-018428616                       | NKLFDFSSGNIPWQEEIIEETGVFGLNLWVWGGDGLP--SELNENNVRRES-IVN-DNSA                     | KSGVCLLL  | 558 |
| GRK1A Florida gar 24879-1-1                       | KEFFDFSSGNIPWQEEIIEETGVFGLNLWVWGGDGLP--NDRRRES-ILE-PPP                           | KSGVCLLL  | 563 |
| GRK1A Bowfin 29529-1-1                            | KEFFDFSSGNIPWQEEIIEETGVFGLNLWVWGGDGLP--NDRRRES-ILE-PPP                           | KSGVCLLL  | 563 |
| GRK1A Zebrafish NP-001029353                      | KEFFDFSSGNIPWQEEIIEETGVFGLNLWVWGGDGLP--NDRRRES-ILE-PPP                           | KSGVCLLL  | 563 |
| GRK1A-1 Medaka NP-001188419                       | KEFFDFSSGNIPWQEEIIEETGVFGLNLWVWGGDGLP--NDRRRES-ILE-OPP                           | KSSTCCAS  | 563 |
| GRK1A-2 Medaka XP-004081538                       | KEFFDFSSGNIPWQEEIIEETGVFGLNLWVWGGDGLP--NDRRRES-ILE-OPP                           | KSSTCCAS  | 561 |
| GRK1A Reef shark 53758-1-1                        | KEFFDFSSGNIPWQEEIIEETGVFGLNLWVWGGDGLP--NDRRRES-ILE-OPP                           | KSSTCCAS  | 565 |
| GRK1A Bamboo shark 8046-1-1                       | KEFFDFSSGNIPWQEEIIEETGVFGLNLWVWGGDGLP--NDRRRES-ILE-MPPS                          | KSGVCLLL  | 565 |
| GRK1A Bluespot ray 29212-2-1                      | KEFFDFSSGNIPWQEEIIEETGVFGLNLWVWGGDGLP--NDRRRES-ILE-MPPS                          | KSGVCLLL  | 564 |
| GRK1A Western ray 41513-9-2                       | KEFFDFSSGNIPWQEEIIEETGVFGLNLWVWGGDGLP--NDRRRES-ILE-MPPS                          | KSGVCLLL  | 564 |
| GRK1A Elephant shark XP-007889799                 | KEFFDFSSGNIPWQEEIIEETGVFGLNLWVWGGDGLP--NDRRRES-ILE-MPPS                          | KSGVCLLL  | 564 |
| GRK C.intestinalis XP-009859302                   | NDFYAKFSTGSIPIPWQEEIIEETGVFGLNLWVWGGDGLP--PDLPYDQOS--NPKKGFSSRLFGROVILVLVLYQE--  | VLKLGH    | 599 |
| GRK B.floridae XP-019631688                       | ESFYKFKFNTGSIPIPWQEEIIEETGVFGLNLWVWGGDGLP--PDLPYDQOS--NPKKGFSSRLFGROVILVLVLYQE-- | VLKLGH    | 610 |
| GRK B.floridae XP-002608270                       | ESFYKFKFNTGSIPIPWQEEIIEETGVFGLNLWVWGGDGLP--PDLPYDQOS--NPKKGFSSRLFGROVILVLVLYQE-- | VLKLGH    | 525 |
| GRK6 Human NP-002073                              | QDFYKFKFNTGSIPIPWQEEIIEETGVFGLNLWVWGGDGLP--PDLPYDQOS--NPKKGFSSRLFGROVILVLVLYQE-- | VLKLGH    | 589 |
| GRK5 Human NP-005299                              | DDFYKFKFNTGSIPIPWQEEIIEETGVFGLNLWVWGGDGLP--PDLPYDQOS--NPKKGFSSRLFGROVILVLVLYQE-- | VLKLGH    | 590 |
| GRK4 Human NP-892027                              | EDFYKFKFNTGSIPIPWQEEIIEETGVFGLNLWVWGGDGLP--PDLPYDQOS--NPKKGFSSRLFGROVILVLVLYQE-- | VLKLGH    | 578 |

..630.....640.....650.....660.....670.....680.....690.....700.....710.....720.....







Arr-S Human NP-000532 --GFLGDLFSSVAVLPPFRMLMHP--QPDP-AK-ES-YS--DANLVFEEFARL--NLKDAAGEEKGRRDKID--VDR-- 405
Arr-S Cattle XP-010802144 --GLLGLDLFSSVAVLPPFRMLMHP--QPDP-AK-ES-PT--DENLVFEEFARL--NLKDAAGEEKEEKTLQEA--MDR-- 404
Arr-S Tasmanian devil XP-003770202 --GFLGDLFSSVAVLPPFRMLMHP--QPDP-AK-ES-DS--GEDLVFEEFARL--NLKDAAGEEKEEKKEGFE--NDR-- 402
Arr-S Koala XP-020827934 --GFLGDLFSSVAVLPPFRMLMHP--QPDP-AK-ES-EM--GEDLVFEEFARL--NLKDIADNEEKKDKKARVVDID-- 404
Arr-S Chicken XP-015132693 --GLLGDFFSSVAVLPPFRMLMHP--KPEE-KN-SA-GKD--GDARVVEEFARL--QLKDDGEBENNVNVE-- 408
Arr-S Ground-tit XP-00529624 --GMLGDLFSSVAVLPPFRMLMHP--KPEE-KN-SA-GKD--GEBALVVEEFARL--QLKDDGEBENNVNVE-- 408
Arr-S Golden eagle XP-011575693 --GMLGDLFSSVAVLPPFRMLMHP--KPEE-KN-SA-GKD--GEBALVVEEFARL--QLKDDGEBENNVNVE-- 409
Arr-S Partial Turtle XP-007052695 --GMLGDLFSSVAVLPPFRMLMHP--KPEE-KN-SA-GKD--GEBALVVEEFARL--QLKDDGEBENNVNVE-- 375
Arr-S Anole XP-016847626 --GLLDFVSSVAVLPPFRMLMHP--KREE-TN-PI-GK--ESDLVVEEFARL--QLNDENSEDDKADPF--NDD-- 403
Arr-S Gecko XP-015282299 --GLLGDFFSSVAVLPPFRMLMHP--KPEE-VN-AR-GK--DDDVMVEEFARL--QLKDELQAEKKEEED--DERK-- 395
Arr-S Xenopus NP-989073 --GLLGDFFSSVAVLPPFRMLMHP--KPEE-VN-AR-GK--EDLVVEEFARL--QLKDELQAEKKEEED--DERK-- 396
Arr-S Nanorana XP-019427475 --GLLGDFFSSVAVLPPFRMLMHP--KPEE-VN-AR-GK--EDLVVEEFARL--QLKDELQAEKKEEED--DERK-- 396
Arr-S Florida gar 22184-1-1 --GIVDVGABEIGLVEIPFLMHP--KPEE-VK-ES-EL--EDEMVEEFARL--YLKGMV--EDEDGNIIPAB-- 391
Arr-S Bowfin 24232-1-2 --GIVDVGABEIGLVEIPFLMHP--KPEE-VK-ES-EL--EDEMVEEFARL--YLKGMV--EDEDGNIIPAB-- 392
Arr-Sa Zebrafish NP-956853 --GM--MGSSEVGLVEIPFLMHP--KPEE-VK-ES-EL--EDEMVEEFARL--YLKGMV--EDEDGNIIPAB-- 392
Arr-Sa Medaka NP-00116373 --GM--MGSSEVGLVEIPFLMHP--KPEE-VK-ES-EL--EDEMVEEFARL--YLKGMV--EDEDGNIIPAB-- 392
Arr-Sb Medaka NP-001098559 --GM--MGSSEVGLVEIPFLMHP--KPEE-VK-ES-EL--EDEMVEEFARL--YLKGMV--EDEDGNIIPAB-- 399
Arr-S1 Reef shark 55938-25-1 --GVLGDLFASDVAIVLPPFLMHP--KPEE-EK-EP-EP--EDLVVEEFARL--QLKDELQAEKKEEED--DERK-- 397
Arr-S1 Bamboo shark 45077-7-1 --GVLGDLFASDVAIVLPPFLMHP--KPEE-EK-EP-EP--EDLVVEEFARL--QLKDELQAEKKEEED--DERK-- 383
Arr-S1 Whale shark XP-020370169-XP-020368728 --GVLGDLFASDVAIVLPPFLMHP--KPEE-EK-EP-EP--EDLVVEEFARL--QLKDELQAEKKEEED--DERK-- 384
Arr-S1 Bluespot ray 30422-1-1 --GMLGDLFSSDVAIVLPPFLMHP--KPEE-NK-NP-EP--EDLVVEEFARL--QLKDELQAEKKEEED--DERK-- 390
Arr-S1 Elephant shark XP-007902404 --GMLGDLFSSDVAIVLPPFLMHP--KPEE-NK-NP-EP--EDLVVEEFARL--QLKDELQAEKKEEED--DERK-- 390
Arr-S2 Reef shark 55253-10-3 --GMLGDLFSDVAIVLPPFLMHP--KPEE-NK-NP-EP--EDLVVEEFARL--QLKDELQAEKKEEED--DERK-- 390
Arr-S2 Bamboo shark 28962-1-1 --GMLGDLFSDVAIVLPPFLMHP--KPEE-NK-NP-EP--EDLVVEEFARL--QLKDELQAEKKEEED--DERK-- 390
Arr-S2 Whale shark XP-020368730 --GMLGDLFSDVAIVLPPFLMHP--KPEE-NK-NP-EP--EDLVVEEFARL--QLKDELQAEKKEEED--DERK-- 390
Arr-S2 Bluespot ray 31414-1-1 --GMLGDLFSDVAIVLPPFLMHP--KPEE-NK-NP-EP--EDLVVEEFARL--QLKDELQAEKKEEED--DERK-- 390
Arr-S2 Western ray 22644-1-1 --GMLGDLFSDVAIVLPPFLMHP--KPEE-NK-NP-EP--EDLVVEEFARL--QLKDELQAEKKEEED--DERK-- 390
Arr-S2 Elephant shark XP-007887798 --GMLGDLFSDVAIVLPPFLMHP--KPEE-NK-NP-EP--EDLVVEEFARL--QLKDELQAEKKEEED--DERK-- 390
Arr-VZ\_E\_cirrhatus 129805-1-1 --RSG--DLAVMLPFLMHP--APKE--QDAGL--R--SKNVLVEFGRK--ATSRABELDEEGEEN--R--EGD-- 385
Arr-VY\_G.australis 54008-1-2 --RNGILGLIAGSDVAVLPPFLMHP--KPEE-DIVYSEVSG--R--GVDVVEEFARL--QLKDELQAEKKEEED--DERK-- 405
Arr-VX\_M.mordax 42250-9-1 --RGGILGLIAGSDVAVLPPFLMHP--KPEE-DIVYSEVSG--R--GVDVVEEFARL--QLKDELQAEKKEEED--DERK-- 391
Arr-VX\_G.australis 59149-4-1 --RGGILGLIAGSDVAVLPPFLMHP--KPEE-DIVYSEVSG--R--GVDVVEEFARL--QLKDELQAEKKEEED--DERK-- 392
Arr-VK\_L.cantschaticum BAJ83617 --RGGILGLIAGSDVAVLPPFLMHP--KPEE-DIVYSEVSG--R--GVDVVEEFARL--QLKDELQAEKKEEED--DERK-- 393
Arr-C Human NP-004303 --CGGILGLIAGSDVAVLPPFLMHP--KPEE-EA-A--R--GVDVVEEFARL--QLKDELQAEKKEEED--DERK-- 388
Arr-C Cattle NP-776419 --CGGILGLIAGSDVAVLPPFLMHP--KPEE-EA-A--R--GVDVVEEFARL--QLKDELQAEKKEEED--DERK-- 392
Arr-C Opossum XP-007507671 --RGGILGLIAGSDVAVLPPFLMHP--KPEE-DV--R--GVDVVEEFARL--QLKDELQAEKKEEED--DERK-- 390
Arr-C Koala XP-020832166 --RGGILGLIAGSDVAVLPPFLMHP--KPEE-DV--R--GVDVVEEFARL--QLKDELQAEKKEEED--DERK-- 398
Arr-C Chicken NP-001091002 --RGGILGLIAGSDVAVLPPFLMHP--KPEE-DV--R--GVDVVEEFARL--QLKDELQAEKKEEED--DERK-- 395
Arr-C Ground-tit XP-00529624 --RGGILGLIAGSDVAVLPPFLMHP--KPEE-DV--R--GVDVVEEFARL--QLKDELQAEKKEEED--DERK-- 395
Arr-C Golden eagle XP-011578691 --RGGILGLIAGSDVAVLPPFLMHP--KPEE-DV--R--GVDVVEEFARL--QLKDELQAEKKEEED--DERK-- 393
Arr-C Turtle XP-007055341 --RGGILGLIAGSDVAVLPPFLMHP--KPEE-DV--R--GVDVVEEFARL--QLKDELQAEKKEEED--DERK-- 392
Arr-C Anole XP-008122024 --RGGILGLIAGSDVAVLPPFLMHP--KPEE-DV--R--GVDVVEEFARL--QLKDELQAEKKEEED--DERK-- 394
Arr-C Gecko XP-015269615 --RGGILGLIAGSDVAVLPPFLMHP--KPEE-DV--R--GVDVVEEFARL--QLKDELQAEKKEEED--DERK-- 394
Arr-C Xenopus XP-012823333 --RGGILGLIAGSDVAVLPPFLMHP--KPEE-DV--R--GVDVVEEFARL--QLKDELQAEKKEEED--DERK-- 387
Arr-C Nanorana XP-019427475 --RGGILGLIAGSDVAVLPPFLMHP--KPEE-DV--R--GVDVVEEFARL--QLKDELQAEKKEEED--DERK-- 389
Arr-C Florida gar 15939-1-1 --RGGILGLIAGSDVAVLPPFLMHP--KPEE-DV--R--GVDVVEEFARL--QLKDELQAEKKEEED--DERK-- 388
Arr-C Bowfin 14016-1-1 --RGGILGLIAGSDVAVLPPFLMHP--KPEE-DV--R--GVDVVEEFARL--QLKDELQAEKKEEED--DERK-- 386
Arr-Ca Zebrafish NP-001002405 --GGGLLGLIAGSDVAVLPPFLMHP--KPKD--R--GVDVVEEFARL--QLKDELQAEKKEEED--DERK-- 357
Arr-Cb Zebrafish NP-957086 --GGGLLGLIAGSDVAVLPPFLMHP--KPKD--R--GVDVVEEFARL--QLKDELQAEKKEEED--DERK-- 362
Arr-C Medaka XP-011478269 --GGGLLGLIAGSDVAVLPPFLMHP--KPKD--R--GVDVVEEFARL--QLKDELQAEKKEEED--DERK-- 365
Arr-C Partial Reef shark 104042-1-1w50893-1-1 --GGGLLGLIAGSDVAVLPPFLMHP--KPKD--R--GVDVVEEFARL--QLKDELQAEKKEEED--DERK-- 394
Arr-C Bamboo shark 45371-8-2 --RGGILGLIAGSDVAVLPPFLMHP--KPEE-VN-V--C--AGDIVVEFNRP--KLDBEQQDEDEHAAE--GEN-- 394
Arr-C Whale shark XP-020383069 --RGGILGLIAGSDVAVLPPFLMHP--KPEE-VN-V--C--AGDIVVEFNRP--KLDBEQQDEDEHAAE--GEN-- 394
Arr-C Bluespot ray 36257-4-1 --RGGILGLIAGSDVAVLPPFLMHP--KPEE-VN-V--C--AGDIVVEFNRP--KLDBEQQDEDEHAAE--GEN-- 394
Arr-C Western ray 37242-1-1 --RGGILGLIAGSDVAVLPPFLMHP--KPEE-VN-V--C--AGDIVVEFNRP--KLDBEQQDEDEHAAE--GEN-- 394
Arr-C1 Elephant shark XP-007892403 --RGGILGLIAGSDVAVLPPFLMHP--KPEE-VN-V--C--AGDIVVEFNRP--KLDBEQQDEDEHAAE--GEN-- 394
Arr-B1 Human NP-004032 --RGGILGLIAGSDVAVLPPFLMHP--KPEE-EP-PH--RE--VPEENAPVDITLLEFDIN--DDDIVVEEFARL--RLKGMKDKKEE--DGTSGFLINDR-- 418
Arr-B1 Cattle NP-776668 --RGGILGLIAGSDVAVLPPFLMHP--KPEE-EP-PH--RE--VPEENAPVDITLLEFDIN--DDDIVVEEFARL--RLKGMKDKKEE--DGTSGFLINDR-- 418
Arr-B1 Tasmanian devil XP-003764705 --RGGILGLIAGSDVAVLPPFLMHP--KPEE-EP-PH--RE--VPEENAPVDITLLEFDIN--DDDIVVEEFARL--RLKGMKDKKEE--DGTSGFLINDR-- 429
Arr-B1 Koala XP-020845203 --RGGILGLIAGSDVAVLPPFLMHP--KPEE-EP-PH--RE--VPEENAPVDITLLEFDIN--DDDIVVEEFARL--RLKGMKDKKEE--DGTSGFLINDR-- 430
Arr-B1 Golden eagle XP-011583127 --RGGILGLIAGSDVAVLPPFLMHP--KPEE-EP-PH--RE--VPEENAPVDITLLEFDIN--DDDIVVEEFARL--RLKGMKDKKEE--DGTSGFLINDR-- 461
Arr-B1 Ground-tit XP-00529624 --RGGILGLIAGSDVAVLPPFLMHP--KPEE-EP-PH--RE--VPEENAPVDITLLEFDIN--DDDIVVEEFARL--RLKGMKDKKEE--DGTSGFLINDR-- 418
Arr-B1 Turtle XP-006127564 --RGGILGLIAGSDVAVLPPFLMHP--KPEE-EP-LH--RD--VPEENAPVDITLLEFDIN--DDDIVVEEFARL--RLKGMKDKKEE--DGTSGFLINDR-- 440
Arr-B1 Gecko XP-015269615 --RGGILGLIAGSDVAVLPPFLMHP--KPEE-EP-LH--RD--VPEENAPVDITLLEFDIN--DDDIVVEEFARL--RLKGMKDKKEE--DGTSGFLINDR-- 414
Arr-B1 Python XP-007440235 --RGGILGLIAGSDVAVLPPFLMHP--KPEE-EP-LH--RD--VPEENAPVDITLLEFDIN--DDDIVVEEFARL--RLKGMKDKKEE--DGTSGFLINDR-- 412
Arr-B1 Xenopus XP-004912283 --RGGILGLIAGSDVAVLPPFLMHP--KPEE-EP-LH--RD--VPEENAPVDITLLEFDIN--DDDIVVEEFARL--RLKGMKDKKEE--DGTSGFLINDR-- 461
Arr-B1 Florida gar 28267-2-1w1-11 --RGGILGLIAGSDVAVLPPFLMHP--KPEE-EP-LH--RD--VPEENAPVDITLLEFDIN--DDDIVVEEFARL--RLKGMKDKKEE--DGTSGFLINDR-- 418
Arr-B1 Bowfin 26818-1-6 --RGGILGLIAGSDVAVLPPFLMHP--KPEE-EP-LH--RD--VPEENAPVDITLLEFDIN--DDDIVVEEFARL--RLKGMKDKKEE--DGTSGFLINDR-- 418
Arr-B1 Zebrafish NP-001153294 --RGGILGLIAGSDVAVLPPFLMHP--KPEE-EP-LH--RD--VPEENAPVDITLLEFDIN--DDDIVVEEFARL--RLKGMKDKKEE--DGTSGFLINDR-- 418
Arr-B1 Medaka XP-011471558 --RGGILGLIAGSDVAVLPPFLMHP--KPEE-EP-LH--RD--VPEENAPVDITLLEFDIN--DDDIVVEEFARL--RLKGMKDKKEE--DGTSGFLINDR-- 395
Arr-B1 Partial Reef shark 38868-1-2 --RGGILGLIAGSDVAVLPPFLMHP--KPEE-EP-LH--RD--VPEENAPVDITLLEFDIN--DDDIVVEEFARL--RLKGMKDKKEE--DGTSGFLINDR-- 364
Arr-B1 Partial Bamboo shark c25388-1-1w2-1 --RGGILGLIAGSDVAVLPPFLMHP--KPEE-EP-LH--RD--VPEENAPVDITLLEFDIN--DDDIVVEEFARL--RLKGMKDKKEE--DGTSGFLINDR-- 354
Arr-B1 Whale shark XP-020371759 --RGGILGLIAGSDVAVLPPFLMHP--KPEE-EP-LH--RD--VPEENAPVDITLLEFDIN--DDDIVVEEFARL--RLKGMKDKKEE--DGTSGFLINDR-- 432
Arr-B1 Non-contig Western ray 78258-1-1w66643-1-1w83393-1-1 --RXXLGLIAGSDVAVLPPFLMHP--KPEE-EP-PH--RE--VPEENAPVDITLLEFDIN--DDDIVVEEFARL--RLKGMKDKKEE--DGTSGFLINDR-- 393
Arr-BY\_M.mordax 41599-5-1 --RGGILGLIAGSDVAVLPPFLMHP--KPEE-ES-LE--RAG--VAPSDSDVVDADLVVFEINGDA--WDDIVVEEFARL--RLKGAKE--EENE--VAPSDSNGK-- 423
Arr-BY-Non-contig G.australis 41931-1-1w37543-2-1w1-1w53942-1-1 --XXXXXXXLGLIAGSDVAVLPPFLMHP--KPEE-ES-LE--RAG--VAPSDSDVVDADLVVFEINGDA--WDDIVVEEFARL--RLKGAKE--EENE--VAPSDSNGK-- 423
Arr-BX-Partial M.mordax 41599-4-1 --RGG--DVAVELPFLMHP--KPEE-EP-LH--RD--VPEENAPVDITLLEFDIN--DDDIVVEEFARL--RLKGMKDKKEE--DGTSGFLINDR-- 242
Arr-BX-Partial G.australis 54326-4-1w1-1w2-3 --RGG--DVAVELPFLMHP--KPEE-EP-LH--RD--VPEENAPVDITLLEFDIN--DDDIVVEEFARL--RLKGMKDKKEE--DGTSGFLINDR-- 423
Arr-BX-Partial Trimmed P. variolus ENSMPAP0000004285 --RGG--DVAVELPFLMHP--KPEE-EP-LH--RD--VPEENAPVDITLLEFDIN--DDDIVVEEFARL--RLKGMKDKKEE--DGTSGFLINDR-- 332
Arr-BX\_L.cantschaticum BAJ83616 --RGG--DVAVELPFLMHP--KPEE-EP-LH--RD--VPEENAPVDITLLEFDIN--DDDIVVEEFARL--RLKGMKDKKEE--DGTSGFLINDR-- 175
Arr-B2 Human NP-004304 --RGG--DVAVELPFLMHP--KPEE-EP-LH--RD--VPEENAPVDITLLEFDIN--DDDIVVEEFARL--RLKGMKDKKEE--DGTSGFLINDR-- 410
Arr-B2 Cattle NP-001192206 --RGG--DVAVELPFLMHP--KPEE-EP-LH--RD--VPEENAPVDITLLEFDIN--DDDIVVEEFARL--RLKGMKDKKEE--DGTSGFLINDR-- 409
Arr-B2 Tasmanian devil XP-003770754 --RGG--DVAVELPFLMHP--KPEE-EP-LH--RD--VPEENAPVDITLLEFDIN--DDDIVVEEFARL--RLKGMKDKKEE--DGTSGFLINDR-- 420
Arr-B2 Koala XP-020822087 --RGG--DVAVELPFLMHP--KPEE-EP-LH--RD--VPEENAPVDITLLEFDIN--DDDIVVEEFARL--RLKGMKDKKEE--DGTSGFLINDR-- 409
Arr-B2 Turtle XP-006116398 --RGG--DVAVELPFLMHP--KPEE-EP-LH--RD--VPEENAPVDITLLEFDIN--DDDIVVEEFARL--RLKGMKDKKEE--DGTSGFLINDR-- 411
Arr-B2 Python XP-007444595 --RGG--DVAVELPFLMHP--KPEE-EP-LH--RD--VPEENAPVDITLLEFDIN--DDDIVVEEFARL--RLKGMKDKKEE--DGTSGFLINDR-- 409
Arr-B2 Gecko XP-015283361 --RGG--DVAVELPFLMHP--KPEE-EP-LH--RD--VPEENAPVDITLLEFDIN--DDDIVVEEFARL--RLKGMKDKKEE--DGTSGFLINDR-- 484
Arr-B2 Xenopus NP-001093721 --RGG--DVAVELPFLMHP--KPEE-EP-LH--RD--VPEENAPVDITLLEFDIN--DDDIVVEEFARL--RLKGMKDKKEE--DGTSGFLINDR-- 429
Arr-B2 Nanorana XP-018417500 --RGG--DVAVELPFLMHP--KPEE-EP-LH--RD--VPEENAPVDITLLEFDIN--DDDIVVEEFARL--RLKGMKDKKEE--DGTSGFLINDR-- 408
Arr-B2 Partial Spotted gar XP-015195812 --RGG--DVAVELPFLMHP--KPEE-EP-LH--RD--VPEENAPVDITLLEFDIN--DDDIVVEEFARL--RLKGMKDKKEE--DGTSGFLINDR-- 408
Arr-B2 Non-contig Bowfin 13774-1-1w18902-1-1 --RGG--DVAVELPFLMHP--KPEE-EP-LH--RD--VPEENAPVDITLLEFDIN--DDDIVVEEFARL--RLKGMKDKKEE--DGTSGFLINDR-- 378
Arr-B2a Zebrafish NP-999846 --RGG--DVAVELPFLMHP--KPEE-EP-LH--RD--VPEENAPVDITLLEFDIN--DDDIVVEEFARL--RLKGMKDKKEE--DGTSGFLINDR-- 327
Arr-B2b Zebrafish NP-957418 --RGG--DVAVELPFLMHP--KPEE-EP-LH--RD--VPEENAPVDITLLEFDIN--DDDIVVEEFARL--RLKGMKDKKEE--DGTSGFLINDR-- 406
Arr-B2 Medaka XP-004076705 --RGG--DVAVELPFLMHP--KPEE-EP-LH--RD--VPEENAPVDITLLEFDIN--DDDIVVEEFARL--RLKGMKDKKEE--DGTSGFLINDR-- 408
Arr-B2 Reef shark 51008-1-2 --RGG--DVAVELPFLMHP--KPEE-EP-LH--RD--VPEENAPVDITLLEFDIN--DDDIVVEEFARL--RLKGMKDKKEE--DGTSGFLINDR-- 409
Arr-B2 Bamboo shark 31008-1-1 --RGG--DVAVELPFLMHP--KPEE-EP-LH--RD--VPEENAPVDITLLEFDIN--DDDIVVEEFARL--RLKGMKDKKEE--DGTSGFLINDR-- 409
Arr-B2 Partial Bluespot ray 34441-5-1 --RGG--DVAVELPFLMHP--KPEE-EP-LH--RD--VPEENAPVDITLLEFDIN--DDDIVVEEFARL--RLKGMKDKKEE--DGTSGFLINDR-- 310
Arr-B2 Partial Western ray 34309-2-1 --RGG--DVAVELPFLMHP--KPEE-EP-LH--RD--VPEENAPVDITLLEFDIN--DDDIVVEEFARL--RLKGMKDKKEE--DGTSGFLINDR-- 310
Arr-C.intestinalis NP-001044147 --LGG--EVCVELPFLMHP--KPAD--VD--PIL--GSPAKV--RAG--KPA--EP--PIDHMLLLEFDINA--EP--PNDIVVEEFARL--RLOGEAA--GGDGG--NA-- 418
Arr-C.savignyi ENSGCVAVP00000014619 --LGG--EVCVELPFLMHP--KPAD--VD--PIL--GSPAKV--RAG--KPA--EP--PIDHMLLLEFDINA--EP--PNDIVVEEFARL--RLOGEAA--GGDGG--NA-- 418
Arr-C. rosetta BAJ76419 --LGG--EVCVELPFLMHP--KPAD--VD--PIL--GSPAKV--RAG--KPA--EP--PIDHMLLLEFDINA--EP--PNDIVVEEFARL--RLOGEAA--GGDGG--NA-- 419
Arr-B.Florida gar 002593261 --LGG--EVCVELPFLMHP--KPAD--VD--PIL--GSPAKV--RAG--KPA--EP--PIDHMLLLEFDINA--EP--PNDIVVEEFARL--RLOGEAA--GGDGG--NA-- 418
Arr-B.belcheri XP-019616407 --LGG--EVCVELPFLMHP--KPAD--VD--PIL--GSPAKV--RAG--KPA--EP--PIDHMLLLEFDINA--EP--PNDIVVEEFARL--RLOGEAA--GGDGG--NA-- 418
Arr-S.kowalevskii NP-001171767 --LGG--EVCVELPFLMHP--KPAD--VD--PIL--GSPAKV--RAG--KPA--EP--PIDHMLLLEFDINA--EP--PNDIVVEEFARL--RLOGEAA--GGDGG--NA-- 441
krz\_D.melanogaster NP-524988 --LGG--EVCVELPFLMHP--KPAD--VD--PIL--GSPAKV--RAG--KPA--EP--PIDHMLLLEFDINA--EP--PNDIVVEEFARL--RLOGEAA--GGDGG--NA-- 439

RGS9\_Human\_NP-001159405 MT-----IRH-----G---GQOYRPRMAFLQKIEALVKDMQNPET-GVRRMQRQVRLVTSVPHAMTGSVDVLOWIVQRLWISSL-EAQN LGNFIVRYGYIYPLQDPKNLILKPD-GSLY 101  
RGS9\_Cattle\_NP-776595 MT-----IRH-----G---GQOYRPRMAFLRKIEALVKDMQDPDI-GVRVQNKQKVVVSI PHAMTGSVDVLOWISQRLWISSL-EAQN LGNFIVRYGYIYPLQDPNRNLTLPKPD-SSLY 101  
RGS9\_Koala\_XP-020856566 MT-----IKH-----G---GQOYRPRMAFLRKIEDLVKEMQNPET-GIRMQSQRVMTINIPHAMTGNIDILQWIAQRLWTGNI-EAQN LGNFIVRYGYIYPLQDPKNLILKPDNSLSY 102  
RGS9\_Opossum\_XP-007482817 MT-----IRH-----G---GQOYRPRMAFLRKIEALVKEMQNPET-GIRMQSQRVMTINIPHAMTGNIDILQWIAQRLWTGNI-EAQN LGNFVVKYGYIYPLQDPKNLILKPDNSLSY 102  
RGS9\_Pigeon\_XP-013225676 -----MAFLKKIEALMMEMQNPDI-GVKTQTVQVMTINIPHAVAGNDVLOWILQRLQITQE-EALH LGDLFVKYGYIYPLQEPKNLILKTD-GSLY 88  
RGS9\_Quail\_XP-015735540 MT-----VARL--DQ---GQRYRPRMAFLKKIEALIMEMQNPDI-GIKTQTVQVMTINIPHAVAGNDIFOWILQRLQITNE-EALH LGDLFVKYGYIYPLQEPKNLILKTD-GILY 103  
RGS9\_Ground-tit\_XP-014111246 MT-----VTRL--DQ---GQRYRPRMAFLKKIEALMMEMQNPDI-GIKTQTVQVMTINIPHAVTGVDIMQWILQRLQITAE-EALH LGDLFVKYGYIYPLQEPKNLILKTD-GSLY 103  
RGS9\_Turtle\_XP-014424786 -----MEMQNPDI-GIKMHTQVMTINIPHAMTGSIDILQWIMQHLKIVVEE-EALN LGNLLVRYGYIYPLQEPKNLILKTD-SSLY 77  
RGS9\_Python\_XP-007421674 MT-----ITHT--DQ---GQRYRPRMAFLKKLEILLVEMQDPHS-GIKTIQTKIINTSINIPHAMTGSIDILKWMQRLQITSE-EALN LGSMVVKCGYIYPLQERKNLILKTD-SSLY 103  
RGS9\_Garter\_snake\_XP-013926935 MT-----IAQT--DQ---GQRYRPRMAFLKKLEVLIVEMQDPQS-GIKTQIINMPENSIPHTVVGCDMLQWIVKRLEITNE-EGLH LGSMMVKCGYIYPLQDRKNLILKGD-TSLY 103  
RGS9\_X.laevis\_XP-018090999 MT-----VKHL--DQ---GQHFPRMAFLKKIEALLLEMDADAI-GIKTHTQRLMITTIPHAVTGHDI LEWLIQRLQITADE-EAQL HGNLMVRCGYIYPLQEPNLTNLVND-SSLY 103  
RGS9\_Florida\_gar\_21856-1-2 MT-----INKL--DY---SQHYRPRMAFLKKIESLVVEMQDPNN-GIKTQTVQRLVITTIPHAITGLDLLQWLANRLOVETE-EAQN IGNLVVYGYIYPLQDHKNLILKPD-GSLY 104  
RGS9\_Bowfin\_26690-1-1 MT-----INKL--DH---SQKYRPRMAFLKKIESLVVEMQDPNS-GIKTQTVQRLVITTIPHAITGLDILQWIINRLOLENE-EAQN TCNLLVYGYIYPLQEHKNLILKPD-ASLY 104  
RGS9\_Zebrafish\_NP-001314729 MT-----IRSDR--DH---GQHYRPRMTCLKKLEAMVVMQDPST-GVKGSDQKLVNTTIPHVMTDODIIAWIAKHMSMENN-EAQAFG TMLVAYGYIYPLQDHKKLVKSD-GSLY 104  
RGS9\_Medaka\_XP-004071947 MT-----IRTVRDR--GQHFPRRMHCLKKLEATVVEMDPKI-GVKGSEQKLVNTTIPHVITAGNDIIAWITNKMKVITQE-EAGVFG TMLVAYGYIYPLQNHKKLVMCND-GSLY 105  
RGS9\_Reef\_shark\_51239-1-1 MT-----IKSF--NQ---GQHYRPRMAFLRKIEPLMMEMQDPNI-GIKTQAQRLVITTIPHAMTGHDI SEWLIQRLQITDE-EGYV LGNMIVKLGYIYPLQEPKNLILKPD-SSLY 103  
RGS9\_Bamboo\_shark\_45486-8-1 MT-----IRNF--NQ---GQOYRPRMAFLRKIEPLIEMQDPNI-GIKTQTVQRLVITTIPHAMTGDVLEWLIQRLQITDE-EGYI LGNMLVRYGYIYPLQDRPRSLVLRAD-NSLY 103  
RGS9\_Bluespot\_ray\_37076-2-1 MT-----VKSF--NQ---GQOFRPRMAFLRKIEPLIMEMQDPGT-GIKTQTVQRLMITTIPHAMTGNVLEWLIHRLOVTE-EGLS LGNLLVRYGYIYPLQEPKNLILKPD-NSLY 103  
RGS9\_Western\_ray\_41046-8-8 MT-----VKSF--NQ---GQOFRPRMAFLRKIEPLIMEMQDPGT-GIKTQTVQRLMITTIPHAMTGNVLEWLIHRLOVTE-EGLS LGNLLVRYGYIYPLQEPKNLILKPD-NSLY 103  
RGS9\_Elephant\_shark\_XP-007886905 MT-----IKSL--SQ---GQHHRPRMAFLKKIESLVVEMQDPNN-GIKTQTVQRLVITTIPHAITGLDLLQWLANRLOVETE-EAQN IGNLVVYGYIYPLQDHKNLILKPD-SSLY 103  
RGS9\_M.mordax\_34174-1-2 MK-----IHRL--EQ---NQHRPRROHHLAKL GALVVTIMQDSEH-GVPMRDQLLDGAVIPDSTGRDLVQWLEQRLQVITAD-EAQL QGWLVLVCGFYIYPLCEPRNLVLRAD-DSFY 103  
RGS9\_G.australis\_56905-1-2 MK-----INKL--DQ---SQOHRPROOHLTKL GALVVMQDPFER-GVPMRDQLLSDTIIIPDATTGHDLMRWIEQRLQITAD-EAL QCLWLLVACGFVYPLSEPRNLAMRPD-GSLY 103  
RGS9\_E.cirrhatu s\_137654-1-3 MK-----INKL--DQ---GQHYRPRMAFIKKLQSLVGMQKRED-GVIFRNQRLITTIPHAMTGFDDLEWFI ELSQITYE-EAHL HGTLVICNGFYIYPLQSEPRDLTLRND-SSLY 103  
RGS11\_Human\_NP-899180 MA-----AGP--AP--PPGPRPRAQMPHLRKMERVVSMQDPDQ-GVKMRSQRLLVTVIPHAVTGSVDVQWLAQKFCVSEE-EALH LGAVLVQHG YIYPLRDRPSLMLRPD-ETPY 103  
RGS11\_Cattle\_NP-001069282 MA-----ASP--AP--LGGHPRVQRPPLSKMERMVVMQDPDQ-GVRRMSQRLLVTVIPHAVNGSDIV EWLMQKYSI AED-EALH LGSLLVQHG YIYPLRDRPRSLVLRAD-ETPY 103  
RGS11\_Koala\_XP-020862219 MC-----VHKGRFWSLAWFSRSNGSLLKSFQMERVIVGMQDPDM-GVKMRNRQLLITVIPHAMTGSIDIV EWLIQKFSISEE-ESLH LGNLI VKHGYIYPLKDP RCLVLRAD-DSPY 109  
RGS11\_Opossum\_XP-001372371 MT-----INS--LH---QGGSYKVMQPCLSKMERVIVGMQDPDM-GVKMRNRQLLITVIPHAMTGHDI VEWLIQKYSISEE-ESLH LGNLI VKHGYIYPLKDP RCLVLRAD-DSPY 103  
RGS11\_Chicken\_XP-001231808 MT-----IGG--PR---GGGQPRLQMPCLGKMERVIVGMQDPDM-GVKMRNRQLLITVIPHAMTGHDI VEWLIQKYSISEE-ESLH LGNLI VRYGYIYPLRDRPSLVLRAD-ESPY 103  
RGS11\_Pigeon\_XP-005508486 -----MEMVIVGMQDPDM-GIKMRNRQLLITVIPHAMTGHDI VEWLIQKYSISEE-ESLH LGNLI VRYGYIYPLRDRPSLVLRAD-ESPY 82  
RGS11\_Ground-tit\_XP-014107999 -----MERMIVSMQDPDM-GIKMRNRQLLITVIPHAMTGHDI VEWLIQKYSISEE-ESLH LGNLI VRYGYIYPLRDRPSLVLRAD-ESPY 82  
RGS11\_Turtle\_XP-007066592 -----MEHVIVSMQDPDM-GIKMRNRQLLITVIPHAMTGHDI VEWLIQKYSISEE-ESLH LGNLI VRYGYIYPLRDRPSLVLRAD-ESPY 82  
RGS11\_Alligator\_XP-014457643 -----MERMIVSMQDPDM-GVKMRNRQLLITVIPHAMTGHDI VEWLIQKYSISEE-ESLH LGNLI VRYGYIYPLKDP RNLVLRAD-ESPY 82  
RGS11\_Anole\_XP-003227697 MT-----ISA--LRPGAGGNSRLQLPCLAKMERVIVGMQDPDM-GVKVRSQRLLITVIPHALTGS DIVQWLVQKYSI AED-EALH LGNLI VRYGYIYPLKDP RSLALRPD-ETPY 105  
RGS11\_Nanorana\_XP-018423234 -----MERLIVAMQDPDI-GIKMRNRQLLITVIPHAMTGHDI VEWLIQKLSINEE-ESLH LGNLI VRYGYIYPLKDP RNLVLRAD-ESPY 82  
RGS11\_Xenopus\_NP-001096497 MT-----INS--LQ---PGKNCKVQMSCLAKMERLVSMQDPDM-GIKMRNRQLLITVIPHAMTGHDI VEWLIQKLSISEE-EAQL HGNLVRYGYIYPLKDP RNLVLRAD-ESPY 103  
RGS11\_Florida\_gar\_29521-1-2 MT-----INT--LQ---LSQGGNYKVMQPCFTKMERVIVAMQDPDM-GIKMRNRQLLITVIPHAVTGHDI VEWLIQKFSITEE-EALH VGNLIVRYGYIYPLKDP KTLILRPD-SSLY 103  
RGS11\_Bowfin\_26311-1-2w1-5 MT-----INT--LQ---LQGGSYKVMQPCFTKMERVIVAMQDPDM-GIKMRNRQLLITVIPHAMTGHDI VEWLIQKFSITEE-EALH VGNLIVRYGYIYPLKDP KTLILRPD-ESPY 103  
RGS11\_Zebrafish\_XP-005170921 MT-----INT--LQ---LSQGGVQVQMPCLTKMERMIISMQDPDM-GIKLRNRQLLITVIPHAMTGHDI VEWLIQKLSITDE-EAHL GQFLVRYGYIYPLKEPRNLVLRAD-ESAY 103  
RGS11\_Medaka\_XP-011484761 MT-----INT--LQ---MAKGGVQVQMPCLTKMERMIISMQDPDM-GMKLRNRQLLITVIPHAMTGHDI VEWLIQKLSITDE-EALH GGLVRYGYIYPLKEPRNLVLRAD-ESAY 103  
RGS11\_Reef\_shark\_50711-1-1 -----S-----ARIHTATIQAACLNKMEKVILAMQDPDI-GIKMKYQKLLITAI PHAVTGS DVVEWLLQNL SISEE-ESLH LGNLI VRYGYIYPLKDP SKNLILRPD-DSPY 98  
RGS11\_Bamboo\_shark\_41815-1-3 MT-----IHT-----SSTHTTKIQMACLAKMEKVIVAMQDPDI-GIKMKYQKLLITAI PHAVTGHDI VEWLIQNL SISEE-ESLH LGDLIVRYGYIYPLKDP KPNFVLRAD-DSPY 102  
RGS11\_Bluespot\_ray\_32308-1-2 MT-----IHG-----TGSQLGGAQMACLAKMETLIVAMQDPDI-GIKMRIQRFLV-PIPHLTGNDIFQWLLQNVSA TEE-ESFHLGDLI IRYGYIYPLKDP RSLVLRAD-DSPY 101  
RGS11\_Western\_ray\_41178-3-3 MT-----IHN-----TRSHIGSAQMACLAKMEKVIVAMQDPDI-GIKMRIQRFLVTPIPHAMTGHDI FEWLLQNL SISEE-ESFHLGDLI IRYGYIYPLKDP KNLVLRAD-DSPY 102  
RGS11\_M.mordax\_39562-1-2 -----MTSSKKVGCCLVRRMDDTHT-GVPLLTRHRLTFAIPN ASIGYNIADWMLRDMKITQE-ETSNLCNLLVRYGYIYPLVVPATHLGFHP--SKLY 87  
RGS11\_G.australis\_47497-1-2 -----MASSEKVGCLICRMDDTHT-GVPLLTRHRLTFAIPN ASIGYNIADWMLRDMKITQE-ETSNLCNLLVRYGYIYPLVVPATHLGFHP--SKLY 87  
RGS11-Partial-Trimmed P.marinus S4RW55 -----VECLVCRMDDKQI-GVPLLTRHRLTFAIPN ASIGYNIADWMLRDMKITQE-ETSNLCNLLVRYGYIYPLVVPATHLGFHP--SKLY 81  
RGS11-Partial-Trimmed L.camtschaticum JL5627 -----MODKQI-GVPLLTRHRLTFAIPN ASIGYNIADWMLRDMKITQE-ETSNLCNLLVRYGYIYPLVVPATHLGFHP--SKLY 74  
RGS11\_E.cirrhatu s\_136920-1-2 -----MSGFKEVEMLVGAMQDPDM-GVMNMFQRLLITVIPHAVTGHDI IIRNLTQSD E-EALNLSNLLVRYGYIYPLLEPANFSLVLRAD-DSIY 88  
RGS\_S.kowalevskii\_XP-006813443 MYGMSSEVGGDSGMV--GECGVGGENEMVGVSEVGGENKIVGVSEVGE-SRISLIQLVYNDISIFVFTIGYDLIEWMLNLDIQDS-EALHLANLFCQYGYIYPLQDKNLVLRAD-DSTLY 116  
RGS-Partial\_S.purpuratus\_XP-011673106 -----ASQVV-----MAQGSQ-DQRAVGV--AD--PEESSPMIVYCKIEDIITKMDDKIGGVP IRTVKSFLSKIPSVVITGTDIVQWLMKNLSIEDPVEAHLGSLIAAQGYIFPISD-HVLTMKDD-GTFY 111  
RGS6\_Human\_NP-001191345 MAQGNNGQTSNGV--AD-----ESSNMLVYRKMDVITARMQDEKN-GPIRTVKSFLSKIPSVFSGSDIVQWLNLTIEDPVEAHLGSLIAAQGYIFPISD-HVLTMKDD-GTFY 108  
RGS7\_Human\_NP-002915 1.....10.....20.....30.....40.....50.....60.....70.....80.....90.....100.....110.....120

```

RGS9_Human_NP-001159405      RFOTPFYFWPFOQWPAEDDYAIYLAKRNIRKKGII--LEEYEKENYNFLNKKMNYKWFVIMQAKEQY-----RAGKERKKADRVALDCEKAYLVHRC 193
RGS9_Cattle_NP-776595       RFOTPFYFWPFOQWPAEDDYAIYLAKRNIRKKGII--LEEYEKENYNFLNKKINXKWFVIMQAKEQY-----RAGKERKKADRVALDCEKAYLVHRC 193
RGS9_Koala_XP-020856566     RFOTPFYFWPFOQWPAEDDYAIYLAKRNIRKKGII--LEEYEKENYSPFNKKINXKWFVIMQAKEQY-----KTGKERKKADRVALDCEKAYLVHRC 194
RGS9_Opossum_XP-007482817  RFOTPFYFWPFOQWPAEDDYAIYLAKRNIRKKGII--LEEYEKENYSPFNKKINXKWFVIMQAKEQY-----KTGKERKKADRVALDCEKAYLVHRC 194
RGS9_Pigeon_XP-013225676   RFOTPFYFWPFOQWPAEDDYAIYLAKRNIRKKGII--LEEYEKEHYNMLNKKINXKWFVIMQAKEQY-----KAGKERKKADRVALDCEKAYLVHRC 180
RGS9_Quail_XP-015735540    RFOTPFYFWPFOQWPAEDDYAIYLAKRNIRKKGII--LEEYEKEHYNMLNKKINXKWFVIMQAKEQY-----KAGKERKKADRVALDCEKAYLVHRC 195
RGS9_Ground-tit_XP-014111246 RFOTPFYFWPFOQWPAEDDYAIYLAKRNIRKKGII--LEEYEKEHYNMLNKKINXKWFVIMQAKEQY-----KAGKERKKADRVALDCEKAYLVHRC 195
RGS9_Turtle_XP-014424786   RFOTPFYFWPFOQWPAEDDYAIYLAKRNIRKKGII--LEEYEKEHYNMLNKKINXKWFVIMQAKEQY-----RTGKERKKADRVALDCEKAYLVHRC 169
RGS9_Python_XP-007421674   RFOTPFYFWPFOQWPAEDDYAIYLAKRNIRKKGII--LEEYEKEHYNMLNKKINXKWFVIMQAKEQY-----RTGKERKKADRVALDCEKAYLVHRC 195
RGS9_Garter_snake_XP-013926935 RFOTPFYFWPFOQWPAEDDYAIYLAKRNIRKKGII--LEEYEKEHYNMLNKKINXKWFVIMQAKEQY-----SAGKERTKEDRYTVDYOEKAYLVHRC 195
RGS9_X.laevis_XP-018090999 RFOTPFYFWPFOQWPAEDDYAIYLAKRNIRKKGII--LEEYEKENYSPFNKKINXKWFVIMQAKEQY-----KAGKERKKADRVALDCEKAYLVHRC 195
RGS9_Florida_gar_21856-1-2 RFOTPFYFWPFOQWPAEDDYAIYLAKRNIRKKGII--LEEYKEDNYNMLHKKINXKWFVIMQAKEQY-----RAGKERKKADRVALDCEKAYLVHRC 196
RGS9_Bowfin_26690-1-1     RFOTPFYFWPFOQWPAEDDYAIYLAKRNIRKKGII--LEEYKEDNYSVLHKKINXKWFVIMQAKEQY-----RAGKERKKADRVALDCEKAYLVHRC 196
RGS9_Zebrafish_NP-001314729 RFOTPFYFWPFOQWPAEDDYAIYLAKRNIRKKGII--LDAHEQEYDYLHKKMNYKWFVIMQAKEQY-----HAGKARPKADRVALDCEKAYLVHRC 196
RGS9_Medaka_XP-004071947   RFOTPFYFWPFOQWPAEDDYAIYLAKRNIRKKGII--LEAYEQAHYNNHLEWLNHWDFVIMQAKEQY-----KAGKDRQKPRVVLDCOEKAYLVHRC 197
RGS9_Reef_shark_51239-1-1  RFOTPFYFWPFOQWPAEDDYAIYLAKRNIRKKGII--LEEYEKENYNLLNKKINXKWFVIMQAKEQY-----RAGKERKKADRVALDCEKAYLVHRC 195
RGS9_Bamboo_shark_45486-8-1 RFOTPFYFWPFOQWPAEDDYAIYLAKRNIRKKGII--LEEYEKENYNLLNKKINXKWFVIMQAKEQY-----RAGKERKKADRVALDCEKAYLVHRC 195
RGS9_Bluespot_ray_37076-2-1 RFOTPFYFWPFOQWPAEDDYAIYLAKRNIRKKGII--LEEYEKENYNLLNKKINXKWFVIMQAKEQY-----RAGKERKKADRVALDCEKAYLVHRC 195
RGS9_Western_ray_41046-8-8 RFOTPFYFWPFOQWPAEDDYAIYLAKRNIRKKGII--LEEYEKENYNLLNKKINXKWFVIMQAKEQY-----RAGKERKKADRVALDCEKAYLVHRC 195
RGS9_Elephant_shark_XP-007886905 RFOTPFYFWPFOQWPAEDDYAIYLAKRNIRKKGII--LEEYEKENYNLLNKKINXKWFVIMQAKEQY-----RAGKERKKADRVALDCEKAYLVHRC 195
RGS9_M.mordax_34174-1-2    RFOTPFYFWPFOQWPAEDDYAIYLAKRNIRKKGII--LEEYKEDNYSVLHKKINXKWFVIMQAKEQY-----RSGRERPKCDRVVLENERAHLVHRC 195
RGS9_G.australis_56905-1-2 RFOTPFYFWPFOQWPAEDDYAIYLAKRNIRKKGII--LDPYEQELYSTLREKINHWDFVIMQAKEQY-----RSGRERPKCDRVVLENERAHLVHRC 195
RGS9_E.cirrhatus_137654-1-3 RFOTPFYFWPFOQWPAEDDYAIYLAKRNIRKKGII--LEGEYKAYNQLHKKINHWDFVIMQAKEQY-----RAAKERRKCDRVVLENERAHLVHRC 195
RGS11_Human_NP-899180      RFOTPFYFWTSTLRPAEELDYAIYLAKRNIRKKGII--LVDYKEDCYDRLHKKINHWDFVIMQAKEQY-----RAAKQRKGDRLVIAEQEYIYLVNRRP 195
RGS11_Cattle_NP-001069282 RFOTPFYFWTSTLRPAEELDYAIYLAKRNIRKKGII--LVDHEKEHYQLHKKINHWDFVIMQAKEQY-----RAAKQRKGDRLVIAEQEYIYLVNRRP 195
RGS11_Koala_XP-020862219   RFOTPFYFWTSTLRPAEELDYAIYLAKRNIRKKGII--LIEHEKDYNNQLHKKINHWDFVIMQAKEQY-----RAVQRKGDRLVIAEQEYIYLVNRRP 201
RGS11_Opossum_XP-001372371 RFOTPFYFWTSTLRPAEELDYAIYLAKRNIRKKGII--LIDHEKDYNNQLHKKINHWDFVIMQAKEQY-----RAAKQRKGDRLVIAEQEYIYLVNRRP 195
RGS11_Chicken_XP-001231808 RFOTPFYFWTSTLRPAEELDYAIYLAKRNIRKKGII--LIEHEKDYNNQLHKKINHWDFVIMQAKEQY-----RAAKQRKGDRLVIAEQEYIYLVNRRP 195
RGS11_Pigeon_XP-005508486  RFOTPFYFWTSTLRPAEELDYAIYLAKRNIRKKGII--LIEHEKDYNNQLHKKINHWDFVIMQAKEQY-----RAAKQRKGDRLVIAEQEYIYLVNRRP 174
RGS11_Ground-tit_XP-014107999 RFOTPFYFWTSTLRPAEELDYAIYLAKRNIRKKGII--LIEHEKDYNNQLHKKINHWDFVIMQAKEQY-----RAAKQRKGDRLVIAEQEYIYLVNRRP 174
RGS11_Turtle_XP-007066592 RFOTPFYFWTSTLRPAEELDYAIYLAKRNIRKKGII--LIDHEKDYNNQLHKKINHWDFVIMQAKEQY-----RAAKQRKGDRLVIAEQEYIYLVNRRP 174
RGS11_Alligator_XP-014457643 RFOTPFYFWTSTLRPAEELDYAIYLAKRNIRKKGII--LIDHEKDYNNQLHKKINHWDFVIMQAKEQY-----RAAKQRKGDRLVIAEQEYIYLVNRRP 174
RGS11_Anole_XP-003227697   RFOTPFYFWTSTLRPAEELDYAIYLAKRNIRKKGII--LIGHEKDYNNQLHKKINHWDFVIMQAKEQY-----RAAKQRKGDRLVIAEQEYIYLVNRRP 197
RGS11_Nanorana_XP-018423234 RFOTPFYFWTSTLRPAEELDYAIYLAKRNIRKKGII--LVEYKEDNYNQLHKKINHWDFVIMQAKEQY-----RAAKQRKGDRLVIAEQEYIYLVNRRP 174
RGS11_Xenopus_NP-001096497 RFOTPFYFWTSTLRPAEELDYAIYLAKRNIRKKGII--LVEYKEDNYNQLHKKINHWDFVIMQAKEQY-----RAAKQRKGDRLVIAEQEYIYLVNRRP 195
RGS11_Florida_gar_29521-1-2 RFOTPFYFWTSTLRPAEELDYAIYLAKRNIRKKGII--LVDYKEDNYNQLHKKINHWDFVIMQAKEQY-----RAAKQRKGDRLVIAEQEYIYLVNRRP 195
RGS11_Bowfin_26311-1-2w1-5 RFOTPFYFWTSTLRPAEELDYAIYLAKRNIRKKGII--LIDYKEDNYNQLHKKINHWDFVIMQAKEQY-----RAAKQRKGDRLVIAEQEYIYLVNRRP 195
RGS11_Zebrafish_XP-005170921 RFOTPFYFWTSTLRPAEELDYAIYLAKRNIRKKGII--LIEYEKCYNQLHKKINHWDFVIMQAKEQY-----RAAKQRKGDRLVIAEQEYIYLVNRRP 195
RGS11_Medaka_XP-011484761  RFOTPFYFWTSTLRPAEELDYAIYLAKRNIRKKGII--LMEYEKERYSLHKKINHWDFVIMQAKEQY-----LRVYMSDQWYVSSHFTQIFQSALCFRASKQRKADRIVLECOEYIYLVNRRP 221
RGS11_Reef_shark_50711-1-1 RFOTPFYFWTSTLRPAEELDYAIYLAKRNIRKKGII--LFDYKEDSYNQLHKKINHWDFVIMQAKEQY-----RAAKQRKGDRLVIAEQEYIYLVNRRP 190
RGS11_Bamboo_shark_41815-1-3 RFOTPFYFWTSTLRPAEELDYAIYLAKRNIRKKGII--LVDYKEDSYNQLHKKINHWDFVIMQAKEQY-----RAAKQRKGDRLVIAEQEYIYLVNRRP 194
RGS11_Bluespot_ray_32308-1-2 RFOTPFYFWTSTLRPAEELDYAIYLAKRNIRKKGII--LVDYKEDNYNQLHKKINHWDFVIMQAKEQY-----RAAKQRKGDRLVIAEQEYIYLVNRRP 193
RGS11_Western_ray_41178-3-3 RFOTPFYFWTSTLRPAEELDYAIYLAKRNIRKKGII--LADYKEDSYNQLHKKINHWDFVIMQAKEQY-----RAAKQRKGDRLVIAEQEYIYLVNRRP 194
RGS11_M.mordax_39562-1-2  HFOTPFYFWPDRRHLASDMQYAVHLVKKNVLSNGQ--LAEYEKMYHQLFRSEHHKWFVIMQAKEQY-----RTVQERRKGDRLVIAEQEYIYLVNRRP 179
RGS11_G.australis_47497-1-2 HFOTPFYFWPDRRHLASDMQYAVHLVKKNVLSNGQ--LKEYEKMYHQLFRSEHHKWFVIMQAKEQY-----CTIQERRKGDRLVIAEQEYIYLVNRRP 179
RGS11-Partial-Trimmed P.marinus S4RW55 HFOTPFYFWPDRRHLASDMQYAVHLVKKNVLSNGQ--LAEYEKMYHQLFRSEHHKWFVIMQAKEQY-----RTLKERRKGDRLVIAEQEYIYLVNRRP 173
RGS11-Partial-Trimmed L.camtschaticum JL5627 HFOTPFYFWPDRRHLASDMQYAVHLVKKNVLSNGQ--LAEYEKMYHQLFRSEHHKWFVIMQAKEQY-----RTLQERRKGDRLVIAEQEYIYLVNRRP 166
RGS11_E.cirrhatus_136920-1-2 RFOTPFYFWPDRRHLASDMQYAVHLVKKNVLSNGQ--LADYEKARYQHLLHKKINHWDFVIMQAKEQY-----SAVKERRKGDRLVIAEQEYIYLVNRRP 180
RGS_S.kowalevskii_XP-006813443 RFOTPFYFWPDRRHLASDMQYAVHLVKKNVLSNGQ--LADYEKARYQHLLHKKINHWDFVIMQAKEQY-----RIAKQRKSDKIVLDSQERAFWVHRRP 210
RGS-Partial_S.purpuratus_XP-011673106 RFOTPFYFWPDRRHLASDMQYAVHLVKKNVLSNGQ--LADYEKARYQHLLHKKINHWDFVIMQAKEQY-----RLAKQRKSDKIVLDSQERAFWVHRRP 50
RGS6_Human_NP-001191345   RFOTPFYFWPDRRHLASDMQYAVHLVKKNVLSNGQ--LADYEKARYQHLLHKKINHWDFVIMQAKEQY-----KIDRKKKTERKILDSQERAFWVHRRP 205
RGS7_Human_NP-002915      RFOTPFYFWPDRRHLASDMQYAVHLVKKNVLSNGQ--LADYEKARYQHLLHKKINHWDFVIMQAKEQY-----KVDKRRKTERKILDSQERAFWVHRRP 202
.....130.....140.....150.....160.....170.....180.....190.....200.....210.....220.....230.....240

```



RGS9\_Human\_NP-001159405 PPGMDNVLDYGLDRV--TNPNE--V-----K--KQTVVAVKKEIMYYQQALMRSTVKSSVSLGGIVKYSEQFSSNDAIMSGCLPSNPWITDDTQFWDL 280  
RGS9\_Cattle\_NP-776595 PPGANNVLDYGLDRV--TNPNE--D-----G--KQTVVSVRKEIMYYRQALMRSTVKSSVSLGGIVKYSEQFSSNDAIMSGCLPSNPWITDDTQFWDL 280  
RGS9\_Koala\_XP-020856566 PPGTDNVLDYGLNVR--TNPNE--D-----K--KITITLVVRKENMYYQQALMRSTVKSSVSLGGIVKYSEQFSSNDPIMSGCLPSNPWITDDTQFWEL 281  
RGS9\_Opossum\_XP-007482817 PPGTDNVLDYGLNVR--TNPNE--V-----K--KDTITSLIRKEIMYYQQALMRSTVKSSVSLGGIVKYSEQFSSNDPIMSGCLPSNPWITDDTQFWEL 281  
RGS9\_Pigeon\_XP-013225676 PPGMLDALEYGLDRV--TDPNE--N-----K--KKTMDVYRREIMYYQQAIMKSRVKSSVSLGGIVKYSEQFLSNDPILSGCLPSNPWITDDPFWDL 267  
RGS9\_Quail\_XP-015735540 PPGMLDVLEYGIDRV--TDPNEDKVN-----G--KKTMDVYRREIMYYQQAIMKSRVKSSVSLGGIVKYSEQFLSNDPILSGCLPSNPWITDDPFWDL 285  
RGS9\_Ground-tit\_XP-014111246 PPGMLDVLEYGLDRV--TDPNE--N-----K--KNTMEFYRREIMYYQQAIMKTRVKSSVSLGGIVKYSEQFLSNDPILSGCLPSNPWITDDPFWDL 282  
RGS9\_Turtle\_XP-014424786 PPGMDVLEYGLDRV--TDPNE--N-----K--KKTIDVYRREIMYYQQAIMKSTVKSSVSLGGIVKYSEQFLSNDPIMSGCLPSNPWITDDAEVWEL 256  
RGS9\_Python\_XP-007421674 PPGMDDALEYGLNVR--TDPCE--N-----K--KKTIDVYRREIMYYQQAIMKTRVKSSVSLGGIVKYSEQFCSNDPIISGCLPSNPWITDDVFWEL 282  
RGS9\_Garter\_snake\_XP-013926935 PPGMADTLDYGLDRA--IEPCE--N-----K--KKTIEVYRTEIMYLOQLMKTATKSSVSLGGIVKYSEQFCSNDPIISGCLPSNPWITDDVFWEL 282  
RGS9\_X.laevis\_XP-018090999 PPGTLDVLEYGLNRA--TDPNV--V-----K--KNTVDYRRHIMYYQQALMRSTVKSSVSLGGIVKYSEQYKSHDPIISGCLPSNPWITDDAMFWEL 282  
RGS9\_Florida\_gar\_21856-1-2 PPGTVMALLEYGLNRF--TDPNA--N-----P--KKTIDVYRREIIFSQQLMKSrvkssvslgglvkyceqyknhdppmagclpsnpwitddtmfwel 283  
RGS9\_Bowfin\_26690-1-1 PPGTINALDYGLNRF--CDPNV--D-----P--KKTIDVYRREIIFNQQLMRSrvkssvslgglvkyceqyknhdppmagclpsnpwitddtmfwel 283  
RGS9\_Zebrafish\_NP-001314729 PPOTHSAMDYGLDRH--IDPNT--E-----E--KKTIDVYRREIIFYQQAIMSRVKSSVSLGAMLVKITFNHNDPFLVPCPLPSNPWITDDNDAYWEL 283  
RGS9\_Medaka\_XP-004071947 PRRTHSALDSSPERL--INPKA--E-----G--KITIDVYRREIIFYQQAIMSRVKSSVSLGALVKFITFKNHDPFLAPCLPSNPWITDDHDAWTL 284  
RGS9\_Reef\_shark\_51239-1-1 APGSLDVLDYGINRA--TDPNA--D-----K--KKTIDVYRREIIFYQQALLVRSRVKSSVSLGGIVKYSEQYFTHDPIISGCLPSNPWITDDTMFWEL 282  
RGS9\_Bamboo\_shark\_45486-8-1 APGTLDVLDYGINRA--TDPNA--D-----K--KKTIDVYRREIIFYQQALVRSRVKSSVSLGGIVKYSEQYFTHDPIISGCLPSNPWITDDTMFWEL 282  
RGS9\_Bluespot\_ray\_37076-2-1 EPGSLDALDYGINRA--TDPNV--N-----K--RKYDYSRREIMYYQQALVRSRVKSSVSLGGIVKYSEQYFTHDPIISGCLPSNPWITDDTMIWEL 282  
RGS9\_Western\_ray\_41046-8-8 EPGSLDVLDYGINRA--TDPNM--N-----K--RKYDYSRREIIFYQQALVRSRVKSSVSLGGIVKYSEQYFTHDPIISGCLPSNPWITDDTMIWEL 282  
RGS9\_Elephant\_shark\_XP-007886905 PPGALDVLDYGINRA--TDPNE--N-----KVEQKMTIDVYRREIIFYQQALVRSRVKSSVSLAGIVKYSEQYFTHDPIISGCLPSNPWITDDVFWEL 285  
RGS9\_M.mordax\_34174-1-2 PPGAFHALDCGLNRF--VKPGT--E-----E--KPSIEFYRROVMYYQQAVSRSRKSTISLGLVKVYAEAFRVYDPLLAPCLPSNPWITDDTMLWTL 282  
RGS9\_G.australis\_56905-1-2 PPGAFHALESGLNVR--VEPGT--E-----E--KPSVEHYRROVMFYQQAAASRSRKSsvtlgsmvkytesfsvydpllatclpsnpwitddtmcwtl 282  
RGS9\_E.cirrhatu\_137654-1-3 PLGMVNSLEYGVDPK--VDPNS--P-----G--DDTVGCVRQIMYYHSLNRSgsksslslekllkcnqvlshdpiltpclpsnpwitddtmfwel 282  
RGS11\_Human\_NP-899180 PPGADVLEGGPGRGSCAASRVL--M-----M--TKSADFHRKEIEYFRKALGRTRVKSSVCLAYLFCGGRGPHDPLVSGCLPSNPWITDDNDAYWAM 284  
RGS11\_Cattle\_NP-001069282 PPGAPSVLEGGPGRGPCIAGRVV--M-----M--TKTLDVYRREIEYFRALGRARVKSSVCLAYLKFSSQGHDPIMSGCLPSNPWITDDTDYWAM 284  
RGS11\_Koala\_XP-020862219 PPGVNLVMEGGPERGNCYTSRVO--M-----M--TKNMDFYKREIEYCKKAMGRTRVKSSICLAYLKFNDQYMPHDPIMSGCLPSNPWITDDTDYWSM 290  
RGS11\_Opossum\_XP-001372371 PPGALNVMEGGPERGNCYTSRVO--M-----M--TKNMDFYKREIEYCKKAMSRTRVKSSICLAYLKFNDQYMPHDPIMSGCLPSNPWITDDTDYWSM 284  
RGS11\_Chicken\_XP-001231808 PPGAPNVLEGGPERRNCHTTRVO--L-----L--AKNMDYKREIEYCRKAMARTRVKSSICLEGYKFNQYVPHDPIISGCLPSNPWITDDTDYWSM 284  
RGS11\_Pigeon\_XP-005508486 PPGAPNVLEGGPERRNCHTTRVO--L-----L--TKNMDYKREIEYCRKAMARTRVKSSICLEGYKFNQYVPHDPIISGCLPSNPWITDDTDYWSM 263  
RGS11\_Ground-tit\_XP-014107999 PPGAPNVLEGGPERRNCHTTRVO--L-----L--TKNMDYKREIEYCRKAMARTRVKSSICLEGYKFNQYVPHDPIISGCLPSNPWITDDTDYWSM 283  
RGS11\_Turtle\_XP-007066592 PP-----P-----P-----ENTDYYKREIECCRKAMGRTRVKSSICLEGYKFNQYVPHDPIISGCLPSNPWITDDTDYWSM 240  
RGS11\_Alligator\_XP-014457643 P-----P-----P-----TKNMDYKREIEYCRKAMGRTRVKSSICLEGYKFNQYVPHDPIISGCLPSNPWITDDTDYWSM 240  
RGS11\_Anole\_XP-003227697 PPGVSNVLEGGPERRNCHTTRVO--L-----L--EKNIDFYKREIEYFRAMVTRVKSSVCLGYIRFNQYVPHDPIISGCLPSNPWITDDTDYWSM 286  
RGS11\_Nanorana\_XP-018423234 SPGCLNVMEYGPKEGDCYTGRCM--L-----L--GKNADYKREIEYFRKAMARTRVKSSICLEGYKFNQYVPHDPIISGCLPSNPWITDDTDYWSM 263  
RGS11\_Xenopus\_NP-001096497 SPGCLNVMEYGPKEGDCYTGRCM--L-----L--GKNIDFYKREIEYFRKAMARTRVKSSICLEGYKFNQYVPHDPIISGCLPSNPWITDDTDYWSM 284  
RGS11\_Florida\_gar\_29521-1-2 PPGALDVLEGGPERRNCHTTRVO--L-----L--LNSYYKKEIEHRSKALSRTRVKSSICLEGYKFNQYVPHDPIISGCLPSNPWITDDTDYWSM 282  
RGS11\_Bowfin\_26311-1-2w1-5 PPGAFDILEGGPERRNCHTTRVO--L-----L--LNSYYKKEIEHRSKALSRTRVKSSICLEGYKFNQYVPHDPIISGCLPSNPWITDDTDYWSM 282  
RGS11\_Zebrafish\_XP-005170921 PPGTLDIMNYGPERR--MNTRV--V-----V--LNAEYKKEIEHNRMSLARNRVKSSICLEGYKFNQYVPHDPIISGCLPSNPWITDDVFWNM 281  
RGS11\_Medaka\_XP-011484761 PPGVHMLDVGLERONNPNLRAT--L-----L--LNSDFYKNEIEVYRRALGRNRVKSSICLEGYKFNQYVPHDPIISGCLPSNPWITDDTAHWTM 308  
RGS11\_Reef\_shark\_50711-1-1 PPGAVDIMEGAPKNNHTTRVKV--L-----L--LNSDFYKNEIEYKALTRSRVKSSISLEGYKFNQYVPHDPIISGCLPSNPWITDDTAHWTM 277  
RGS11\_Bamboo\_shark\_41815-1-3 PPGAINIMESTPRGSNIHTTRVT--L-----L--LNSAFYKREIEYKALTRSRVKSSISLEGYKFNQYVPHDPIISGCLPSNPWITDDTAHWTM 281  
RGS11\_Bluespot\_ray\_32308-1-2 PPGALNIMESGPRRNTIQARIKL--L-----L--KNSAYYKKEIEYKALTRSRVKSSISLEGYKFNQYVPHDPIISGCLPSNPWITDDTAHWTM 280  
RGS11\_Western\_ray\_41178-3-3 PPGALNIMESGPRRNTIQARIKL--L-----L--KNSAYYKKEIEYKALTRSRVKSSISLEGYKFNQYVPHDPIISGCLPSNPWITDDTAHWTM 281  
RGS11\_M.mordax\_39562-1-2 PPGLSDALHGPVKHT--MALHRD--L-----L--OVVELYKKEIIVYCRKALGRARLKPSVSLGGLLYSEQFSPPLDPLLSGCLPNNPWITDDTDYWSM 265  
RGS11\_G.australis\_47497-1-2 PPPEFSDALHGPVKHT--IALHRD--L-----L--OVVELYKKEIIVYCRKALGRARLKPSVSLGGLLYSEQFSPPLDPLLSGCLPNNPWITDDTDYWSM 265  
RGS11-Partial-Trimmed P.marinus S4RW55 PPGLDNDALENGPVKHT--MALHRD--L-----L--O-----IVYGRKALGRARLKPSVSLGGLLYSEQFSPPLDPLLSGCLPNNPWITDDTDYWSM 251  
RGS11-Partial-Trimmed L.camtschaticum JL5627 PPGLDNDALENGPVKHT--MALHRD--L-----L--O-----OVAELYKNOIVYGRKALGRARLKPSVSLGGLLYSEQFIPPLDPLLSGCLPNNPWITDDTDYWSM 252  
RGS11\_E.cirrhatu\_136920-1-2 PPDTTCVFERDNMRMASTSLAKV--L-----L--KTAEYKKEIIVYCGKALVRARVKSSISLEGYKFNQYVPHDPIISGCLPNNPWITDDTDYWSM 267  
RGS\_S.kowalevskii\_XP-006813443 PPGQINSLESSIKRNCRMTTYNV--K-----K--RRTLEDYKKEIIVYCGKALVRARVKSSISLEGYKFNQYVPHDPIISGCLPNNPWITDDTDYWSM 300  
RGS-Partial\_S.purpuratus\_XP-011673106 PPGQTNCLEADIRKCKNSQAPK--L-----L--KPSPEEFKQVYIYLNRLSKMTIKTSKAIIDLIRYCFERFAEHDPFISGAQPSNPWITDDTDYWSM 140  
RGS6\_Human\_NP-001191345 VPGCVNTEMDIRKCRRLKPKPK--VKSsvygvteesqaqspvhvlsopir--K--KITKEDIRKQVIFLNAQIDRHCLKMSKVAESLIAYTEQVVEYDPLIPAEPSNPWITDDVALWDI 319  
RGS7\_Human\_NP-002915 VPGCVNTEVDIRKSRMRNPKH--TRKsvyglondirshspthtpetk--K--PPTBEDLQQQIKYVQIQLDRHLKMSKVAESLLSYTEQVVEYDPLIPAEPSNPWITDDTDYWSM 316  
.....250.....260.....270.....280.....290.....300.....310.....320.....330.....340.....350.....360

RG9\_Human\_NP-001159405  
RG9\_Cattle\_NP-776595  
RG9\_Koala\_XP-020856566  
RG9\_Pigeon\_XP-013225676  
RG9\_Quail\_XP-015735540  
RG9\_Ground-tit\_XP-014111246  
RG9\_Turtle\_XP-014424786  
RG9\_Python\_XP-007421674  
RG9\_Garter\_snake\_XP-013926935  
RG9\_X.lauevis\_XP-018090999  
RG9\_Florida\_gar\_21856-1-2  
RG9\_Bowfin\_26690-1-1  
RG9\_Zebrafish\_NP-001314729  
RG9\_Medaka\_XP-004071947  
RG9\_Reef\_shark\_51239-1-1  
RG9\_Bamboo\_shark\_45486-8-1  
RG9\_Bluespot\_ray\_37076-2-1  
RG9\_Western\_ray\_41046-8-8  
RG9\_Elephant\_shark\_XP-007886905  
RG9\_M.mordax\_34174-1-2  
RG9\_G.australis\_56905-1-2  
RG9\_E.cirrhatu\_137654-1-3  
RG11\_Human\_NP-899180  
RG11\_Cattle\_NP-001069282  
RG11\_Koala\_XP-020862219  
RG11\_Opossum\_XP-001372371  
RG11\_Chicken\_XP-001231808  
RG11\_Pigeon\_XP-005508486  
RG11\_Ground-tit\_XP-014107999  
RG11\_Turtle\_XP-007066592  
RG11\_Alligator\_XP-014457643  
RG11\_Anole\_XP-003227697  
RG11\_Nanorana\_XP-018423234  
RG11\_Xenopus\_NP-001096497  
RG11\_Florida\_gar\_29521-1-2  
RG11\_Bowfin\_26311-1-2w1-5  
RG11\_Zebrafish\_XP-005170921  
RG11\_Medaka\_XP-011484761  
RG11\_Reef\_shark\_50711-1-1  
RG11\_Bamboo\_shark\_41815-1-3  
RG11\_Bluespot\_ray\_32308-1-2  
RG11\_Western\_ray\_41178-3-3  
RG11\_M.mordax\_39562-1-2  
RG11\_G.australis\_47497-1-2  
RG11-Partial-Trimmed P.marinu\_54RW55  
RG11-Partial-Trimmed L.camtschaticum\_JL5627  
RG11\_E.cirrhatu\_136920-1-2  
RG\_S.kowalevskii\_XP-006813443  
RG-Partial\_S.purpuratus\_XP-011673106  
RG6\_Human\_NP-001191345  
RG7\_Human\_NP-002915

\* . \* : \* : : \* \* : : \* \* \* : : .  
NAKLVEIPTKMRVERWAFNFSSELIIRDPKGRQSFQYFLKKEFSGENLGFWEACEDLKYGDQSKVKEKAEIYKFLAPGARRWINIDGKTMIDITVKGLKHPHRYVLDAAQTHIYMLMKKDS 400  
NAKLVDIPTKMRVERWAFNFSSELIIRDPKGRQSFQYFLKKEFSGENLGFWEACEDLKYGDQSKVKEKAEIYKFLAPGARRWINIDGKTMIDITVKGLKHPHRYVLDAAQTHIYMLMKKDS 400  
NAKLVEIPTKMRVERWAFNFSSELIIRDPKGRQSFQYFLKKEFSGENLGFWEACEDLKYGDQSKVKEKAEIYKFLAPGARRWINIDGKTMIDITVKGLKHPHRYVLDAAQTHIYMLMKKDS 401  
NAKLVDIPTKMRVERWAFNFSSELIIRDPKGRQSFQYFLKKEFSGENLGFWEACEDLKYGDQSKVKEKAEIYKFLAPGARRWINIDGKTMIDITVKGLKHPHRYVLDAAQTHIYMLMKKDS 401  
NAKLVEVPTKMRVERWAFNFSSELIIRDPKGRQSFQYFLKKEFSGENLGFWEACEDLKYGDQSNIKKAEIYKFLAPGARRWINIDGTMGITVVRGLKHPHRYVLDAAQTHIYMLMKKDS 387  
NAKLVEIPTKMRVERWAFNFSSELIIRDPKGRQSFQYFLKKEFSGENLGFWEACEDLKYGDQSKVKEKAEIYKFLAPGARRWINIDGTMGITVVRGLKHPHRYVLDAAQTHIYMLMKKDS 400  
NAKLVEVPTKMRVERWAFNFSSELIIRDPKGRQSFQYFLKKEFSGENLGFWEACEDLKYGDQSKVKEKAEIYKFLAPGARRWINIDGTMGITVVRGLKHPHRYVLDAAQTHIYMLMKKDS 402  
NAKLVEIPTKMRVERWAFNFSSELIIRDPKGRQSFQYFLKKEFSGENLGFWEACEDLKYGDQSKVKEKAEIYKFLAPGARRWINIDGTMGITVVRGLKHPHRYVLDAAQTHIYMLMKKDS 376  
NAKLVEIPTKARVEKWFNFSSELIIRDPKGRQSFQYFLKKEFSGENLGFWEACEDLKYGDQSKVKEKAEIYKFLAPGARRWINIDGTMGITVVRGLKHPHRYVLDAAQTHIYMLMKKDS 402  
NAKLVEIPTKARVEKWFNFSSELIIRDPKGRQSFQYFLKKEFSGENLGFWEACEDLKYGDQSKVKEKAEIYKFLAPGARRWINIDGTMGITVVRGLKHPHRYVLDAAQTHIYMLMKKDS 402  
NAKLVEIPTKARVEKWFNFSSELIIRDPKGRQSFQYFLKKEFSGENLGFWEACEDLKYGDQSKVKEKAEIYKFLAPGARRWINIDGTMGITVVRGLKHPHRYVLDAAQTHIYMLMKKDS 402  
NMPMVENPTKLRVERWTFNFSFELLDSDPRGRQDFOLFLKKEFSGENLAFWEACEDLKYGDQTKVKEKAEIYKFLAPGARRWINIDGKTMIDITVKGLKHPHRYVLDAAQTHIYMLMKKDS 403  
NMPMVENPTKLRVERWTFNFSFELLDSDPRGRQDFOLFLKKEFSGENLAFWEACEDLKYGDQTKVKEKAEIYKFLAPGARRWINIDGKTMIDITVKGLKHPHRYVLDAAQTHIYMLMKKDS 403  
NTDDIEVPTKMRVERWTFNFSFELLDSDPRGRQDFOLFLKKEFSGENLAFWEACEDLKYGDQTKVKEKAEIYKFLAPGARRWINIDGTMGITVVRGLKHPHRYVLDAAQTHIYMLMKKDS 403  
NMRRVEVPTKMRVERWTFNFSFELLDSDPRGRQDFOLFLKKEFSGENLAFWEACEDLKYGDQTKVKEKAEIYKFLAPGARRWINIDGTMGITVVRGLKHPHRYVLDAAQTHIYMLMKKDS 404  
NIPMVDNPTKLRVERWTFNFSFELLDSDPRGRQDFOLFLKKEFSGENLAFWEACEDLKYGDQTKVKEKAEIYKFLAPGARRWINIDGTMGITVVRGLKHPHRYVLDAAQTHIYMLMKKDS 402  
NIPMVDNPTKLRVERWTFNFSFELLDSDPRGRQDFOLFLKKEFSGENLAFWEACEDLKYGDQTKVKEKAEIYKFLAPGARRWINIDGTMGITVVRGLKHPHRYVLDAAQTHIYMLMKKDS 402  
NIPMVDNPTKLRVERWTFNFSFELLDSDPRGRQDFOLFLKKEFSGENLAFWEACEDLKYGDQTKVKEKAEIYKFLAPGARRWINIDGTMGITVVRGLKHPHRYVLDAAQTHIYMLMKKDS 402  
NIPMVDNPTKLRVERWTFNFSFELLDSDPRGRQDFOLFLKKEFSGENLAFWEACEDLKYGDQTKVKEKAEIYKFLAPGARRWINIDGTMGITVVRGLKHPHRYVLDAAQTHIYMLMKKDS 402  
NIPMVDNPTKLRVERWTFNFSFELLDSDPRGRQDFOLFLKKEFSGENLAFWEACEDLKYGDQTKVKEKAEIYKFLAPGARRWINIDGTMGITVVRGLKHPHRYVLDAAQTHIYMLMKKDS 405  
NAPSVDVPTKLRVERWTFNFSFELLDSDPRGRQDFOLFLKKEFSGENLAFWEACEDLKYGDQTKVKEKAEIYKFLAPGARRWINIDGTMGITVVRGLKHPHRYVLDAAQTHIYMLMKKDS 402  
NAPSVEVPTKLRVERWTFNFSFELLDSDPRGRQDFOLFLKKEFSGENLAFWEACEDLKYGDQTKVKEKAEIYKFLAPGARRWINIDGTMGITVVRGLKHPHRYVLDAAQTHIYMLMKKDS 402  
NAPNVVPTKLRVERWTFNFSFELLDSDPRGRQDFOLFLKKEFSGENLAFWEACEDLKYGDQTKVKEKAEIYKFLAPGARRWINIDGTMGITVVRGLKHPHRYVLDAAQTHIYMLMKKDS 402  
NAPNVVPTKLRVERWTFNFSFELLDSDPRGRQDFOLFLKKEFSGENLAFWEACEDLKYGDQTKVKEKAEIYKFLAPGARRWINIDGTMGITVVRGLKHPHRYVLDAAQTHIYMLMKKDS 404  
NAPTVAAPTTLRVERWTFNFSFELLDSDPRGRQDFOLFLKKEFSGENLAFWEACEDLKYGDQTKVKEKAEIYKFLAPGARRWINIDGTMGITVVRGLKHPHRYVLDAAQTHIYMLMKKDS 404  
NAPSAVPTTLRVERWTFNFSFELLDSDPRGRQDFOLFLKKEFSGENLAFWEACEDLKYGDQTKVKEKAEIYKFLAPGARRWINIDGTMGITVVRGLKHPHRYVLDAAQTHIYMLMKKDS 404  
NAPTVEPTTLRVERWTFNFSFELLDSDPRGRQDFOLFLKKEFSGENLAFWEACEDLKYGDQTKVKEKAEIYKFLAPGARRWINIDGTMGITVVRGLKHPHRYVLDAAQTHIYMLMKKDS 410  
NAPTVEPTTLRVERWTFNFSFELLDSDPRGRQDFOLFLKKEFSGENLAFWEACEDLKYGDQTKVKEKAEIYKFLAPGARRWINIDGTMGITVVRGLKHPHRYVLDAAQTHIYMLMKKDS 404  
NAPTVEPTTLRVERWTFNFSFELLDSDPRGRQDFOLFLKKEFSGENLAFWEACEDLKYGDQTKVKEKAEIYKFLAPGARRWINIDGTMGITVVRGLKHPHRYVLDAAQTHIYMLMKKDS 404  
NAPTVEPTTLRVERWTFNFSFELLDSDPRGRQDFOLFLKKEFSGENLAFWEACEDLKYGDQTKVKEKAEIYKFLAPGARRWINIDGTMGITVVRGLKHPHRYVLDAAQTHIYMLMKKDS 383  
NAPTVEPTTLRVERWTFNFSFELLDSDPRGRQDFOLFLKKEFSGENLAFWEACEDLKYGDQTKVKEKAEIYKFLAPGARRWINIDGTMGITVVRGLKHPHRYVLDAAQTHIYMLMKKDS 383  
NAPTVEPTTLRVERWTFNFSFELLDSDPRGRQDFOLFLKKEFSGENLAFWEACEDLKYGDQTKVKEKAEIYKFLAPGARRWINIDGTMGITVVRGLKHPHRYVLDAAQTHIYMLMKKDS 360  
NAPTVEPTTLRVERWTFNFSFELLDSDPRGRQDFOLFLKKEFSGENLAFWEACEDLKYGDQTKVKEKAEIYKFLAPGARRWINIDGTMGITVVRGLKHPHRYVLDAAQTHIYMLMKKDS 360  
NAPTVEPTTLRVERWTFNFSFELLDSDPRGRQDFOLFLKKEFSGENLAFWEACEDLKYGDQTKVKEKAEIYKFLAPGARRWINIDGTMGITVVRGLKHPHRYVLDAAQTHIYMLMKKDS 406  
NAPMVPMTKLRDRWTFNFSFELLDSDPRGRQDFOLFLKKEFSGENLAFWEACEDLKYGDQTKVKEKAEIYKFLAPGARRWINIDGTMGITVVRGLKHPHRYVLDAAQTHIYMLMKKDS 383  
NAPMVPMTKLRDRWTFNFSFELLDSDPRGRQDFOLFLKKEFSGENLAFWEACEDLKYGDQTKVKEKAEIYKFLAPGARRWINIDGTMGITVVRGLKHPHRYVLDAAQTHIYMLMKKDS 404  
NADLVATPTKMRVERWTFNFSFELLDSDPRGRQDFOLFLKKEFSGENLAFWEACEDLKYGDQTKVKEKAEIYKFLAPGARRWINIDGTMGITVVRGLKHPHRYVLDAAQTHIYMLMKKDS 402  
NADLVATPTKMRVERWTFNFSFELLDSDPRGRQDFOLFLKKEFSGENLAFWEACEDLKYGDQTKVKEKAEIYKFLAPGARRWINIDGTMGITVVRGLKHPHRYVLDAAQTHIYMLMKKDS 402  
NADLVATPTKMRVERWTFNFSFELLDSDPRGRQDFOLFLKKEFSGENLAFWEACEDLKYGDQTKVKEKAEIYKFLAPGARRWINIDGTMGITVVRGLKHPHRYVLDAAQTHIYMLMKKDS 401  
NADLVATPTKMRVERWTFNFSFELLDSDPRGRQDFOLFLKKEFSGENLAFWEACEDLKYGDQTKVKEKAEIYKFLAPGARRWINIDGTMGITVVRGLKHPHRYVLDAAQTHIYMLMKKDS 428  
NADLVATPTKMRVERWTFNFSFELLDSDPRGRQDFOLFLKKEFSGENLAFWEACEDLKYGDQTKVKEKAEIYKFLAPGARRWINIDGTMGITVVRGLKHPHRYVLDAAQTHIYMLMKKDS 397  
NADLVATPTKMRVERWTFNFSFELLDSDPRGRQDFOLFLKKEFSGENLAFWEACEDLKYGDQTKVKEKAEIYKFLAPGARRWINIDGTMGITVVRGLKHPHRYVLDAAQTHIYMLMKKDS 401  
NADLVATPTKMRVERWTFNFSFELLDSDPRGRQDFOLFLKKEFSGENLAFWEACEDLKYGDQTKVKEKAEIYKFLAPGARRWINIDGTMGITVVRGLKHPHRYVLDAAQTHIYMLMKKDS 400  
NADLVATPTKMRVERWTFNFSFELLDSDPRGRQDFOLFLKKEFSGENLAFWEACEDLKYGDQTKVKEKAEIYKFLAPGARRWINIDGTMGITVVRGLKHPHRYVLDAAQTHIYMLMKKDS 401  
NATMVEVPTKLRVERWTFNFSFELLDSDPRGRQDFOLFLKKEFSGENLAFWEACEDLKYGDQTKVKEKAEIYKFLAPGARRWINIDGTMGITVVRGLKHPHRYVLDAAQTHIYMLMKKDS 385  
NATMVEVPTKLRVERWTFNFSFELLDSDPRGRQDFOLFLKKEFSGENLAFWEACEDLKYGDQTKVKEKAEIYKFLAPGARRWINIDGTMGITVVRGLKHPHRYVLDAAQTHIYMLMKKDS 385  
NATMVEVPTKLRVERWTFNFSFELLDSDPRGRQDFOLFLKKEFSGENLAFWEACEDLKYGDQTKVKEKAEIYKFLAPGARRWINIDGTMGITVVRGLKHPHRYVLDAAQTHIYMLMKKDS 371  
NATMVEVPTKLRVERWTFNFSFELLDSDPRGRQDFOLFLKKEFSGENLAFWEACEDLKYGDQTKVKEKAEIYKFLAPGARRWINIDGTMGITVVRGLKHPHRYVLDAAQTHIYMLMKKDS 300  
HATMVEVPTKLRVERWTFNFSFELLDSDPRGRQDFOLFLKKEFSGENLAFWEACEDLKYGDQTKVKEKAEIYKFLAPGARRWINIDGTMGITVVRGLKHPHRYVLDAAQTHIYMLMKKDS 387  
NTVVLVDIPTERRVRRWTFNFSFELLDSDPRGRQDFOLFLKKEFSGENLAFWEACEDLKYGDQTKVKEKAEIYKFLAPGARRWINIDGTMGITVVRGLKHPHRYVLDAAQTHIYMLMKKDS 420  
NTVVLVDIPTERRVRRWTFNFSFELLDSDPRGRQDFOLFLKKEFSGENLAFWEACEDLKYGDQTKVKEKAEIYKFLAPGARRWINIDGTMGITVVRGLKHPHRYVLDAAQTHIYMLMKKDS 260  
EM--SKEPSQQRVRRWTFNFSFELLDSDPRGRQDFOLFLKKEFSGENLAFWEACEDLKYGDQTKVKEKAEIYKFLAPGARRWINIDGTMGITVVRGLKHPHRYVLDAAQTHIYMLMKKDS 437  
EA--SKEPSQQRVRRWTFNFSFELLDSDPRGRQDFOLFLKKEFSGENLAFWEACEDLKYGDQTKVKEKAEIYKFLAPGARRWINIDGTMGITVVRGLKHPHRYVLDAAQTHIYMLMKKDS 434  
.....370.....380.....390.....400.....410.....420.....430.....440.....450.....460.....470.....480

RGS9\_Human\_NP-001159405 YARYLKSPIYKDLAKAIEPQETTK---KSSLPFMRRLRSLSSPSPVILR---OL-EEEAKAREAAAT---VDITQVM-SKLDRRSQL-----QKELPP 483  
RGS9\_Cattle\_NP-776595 YARYLKSPIYKEMLAKAIEPQETTR---KSSLPFMRRLRSLSSPSPVILR---OL-EEEAKAREAAAT---VDITQVM-SKLDRRSQL-----RKEPPP 483  
RGS9\_Koala\_XP-020856566 YARYLKSPIYKEMLAKAIEPQETSR---RSSLFPFRRRLRSLSSPSPVILR---OL-EEEAKAREAAAT---VDITQVM-SKLDRRSQL-----KKEIPP 484  
RGS9\_Opossum\_XP-007482817 YARYLKSPIYKEMLAKAIEPQETSK---R-SSLFPFMRRLRSLSSPSPVILR---OL-EEEAKAREAAAT---VDITQVM-SKLDRRSQL-----KKEIPP 483  
RGS9\_Pigeon\_XP-013225676 YGRYLKSPVYKEMLAKAVVPEQTVK---KSNFPPFRRRLRSLSSPSPVILR---OC-EEEAKAREAAAT---VDITQVM-SKLDRRSQL-----QKDP-PP 469  
RGS9\_Quail\_XP-015735540 YGRYLKSPVYKEMLAKAVVPEQTVK---KSSFPFGRRLRSLSSPSPVILR---OC-EEEAKAREAAAT---VDITQVM-SKLDRRSQL-----KQE-PP 487  
RGS9\_Ground-tit\_XP-014111246 YGRYLKSPVYKEMLAKAVVPEGVK---KSTGL-FGRRLRSLSSPSPVILR---OC-EEEAKAREAAAT---VDITQVM-SKLDRRSQL-----KREAPP 484  
RGS9\_Turtle\_XP-014424786 YGRYLKSPVYKEMLAKAVVPEQTVK---KSSFPFARRHLRSLSSPSPVILR---OC-EEEAKAREAAAT---VDITQVM-SKLDRRSQL-----KQE-PP 458  
RGS9\_Python\_XP-007421674 YGRYLKSPVYKEMLAKAVVPEQAVK---KSSNPPFVRKHLRSLSSPSPVILR---OL-EEEAKAREAAAT---VDITQVM-SKLDRRSQL-----KREAPP 485  
RGS9\_Garter\_snake\_XP-013926935 YGRYLKSPVYKEMLAKAVVPEQVVK---KSSNPPFARKHLRSLSSPSPVILR---OL-EEEAKAREAAAT---VDITQVM-SKLDRRSQL-----KREAPP 485  
RGS9\_X.laevlis\_XP-018090999 YARYLKSPIYKEMLAKAVVPEQTKK---SNFPFMRRLRSLSSPSPVILR---OL-EEEAKAREAAAT---VDITQVM-SKLDRRSQL-----KQETPK 483  
RGS9\_Florida\_gar\_21856-1-2 FGRYMKSPIYKEMLAKAVVPEQTKL---NEGKFGFNRKHLRSLSSPSPVILR---OL-EEEAKAREAAAT---VDITQVM-SKLDRRSQL-----KQEPPO 487  
RGS9\_Bowfin\_26690-1-1 FGRYMKSPIYKEMLAKAVVPEQTKV---SEKFGFNRKHLRSLSSPSPVILR---OL-EEEAKAREAAAT---VDITQVM-SKLDRRSQL-----KQEPAP 487  
RGS9\_Zebrafish\_NP-001314729 FYRYLKSPIYKEMLAKAVVPEQPHNF---TEAGLEONMRRRPSISPIITY---OK-EEEEKAKAAAAAGP-VDIKLMA-SKLDRRK--- 480  
RGS9\_Medaka\_XP-004071947 FYRYLKSPIYKEMLAKAVVPEAHNF---SPAOLEQNAONRNPIDPIILW---OC-DEEEKAKAAAAAGP-VDVKAMM-SKIDRRK--- 481  
RGS9\_Reef\_shark\_51239-1-1 YPRFLKSDMYKEMLAKAVVPEETK---OKSNFPMRRLRSLSSPSPVILR---OL-ELEAKAKAAAAAGTKVVDITQVM-SKLDRRSQL-----KQEPK 487  
RGS9\_Bamboo\_shark\_45486-8-1 YPRFLKSDMYKEMLAKAVVPEETK---PKSNFPMRRLRSLSSPSPVILR---OL-ELEAKAKAAAAAGTKVVDITQVM-SKLDRRSQL-----KQEPK 487  
RGS9\_Bluespot\_ray\_37076-2-1 YPRFLKSDMYKEMLAKAVVPEETK---OKSNFPMRRLRSLSSPSPVILR---OL-EEEARAAAAAGTKVVDITQVM-SKLDRRSQL-----KQEPK 486  
RGS9\_Western\_ray\_41046-8-8 YPRFLKSDMYKEMLAKAVVPEETK---OKSNFPMRRLRSLSSPSPVILR---OL-EEEARAAAAAGTKVVDITQVM-SKLDRRSQL-----KQEPK 486  
RGS9\_Elephant\_shark\_XP-007886905 YPRFLKSDMYKEMLAKAVVPEQTK---OKS-FPFMRRLRSLSSPSPVILR---OL-EEEARAAAAAGTKVVDITQVM-SKLDRRSQL-----KQEPK 489  
RGS9\_M.mordax\_34174-1-2 FYRYLKSPIYKEMLAKAVVPEQTKV---S---ARFARHTSPSPVSLR---AE-EEEARAAAAAGTKVVDITQVM-SKLDRRSQL-----AK--- 478  
RGS9\_G.australis\_56905-1-2 FYRYLKSPIYKEMLAKAVVPEQTKV---S---ARFPRHASPSPVSLR---AA-EEEEKAKAAAAAGP-VDITQVM-SKLDRRSQL-----AK--- 478  
RGS9\_E.cirrhatu\_137654-1-3 YPRYLKSDLYKEMLAKAVVPEQTKI---STLPPFVHPKRHSSPSPVILR---NE-EDTAPLIPLPASAEVSGFSSIF-SPRIYRGPP---AVGPGG 486  
RGS11\_Human\_NP-899180 YPRFLKSDMYKEMLAKAVVPEQTKI---RVFPFTRWRHSSPSPAL-LP-TPVPEPTAACGGGGD---G-VA--- 467  
RGS11\_Cattle\_NP-001069282 YPRFLKSDMYKEMLAKAVVPEQTKI---RVFPFTRWRHSSPSPAL-LP-TPVPEPTAACGGGGD---G-VA--- 465  
RGS11\_Koala\_XP-020862219 YPRFLKSDMYKEMLAKAVVPEQTKI---RVFPFTRWRHSSPSPAL-LP-TPVPEPTAACGGGGD---G-VA--- 481  
RGS11\_Opossum\_XP-001372371 YPRFLKSDMYKEMLAKAVVPEQTKI---RVFPFTRWRHSSPSPAL-LP-TPVPEPTAACGGGGD---G-VA--- 476  
RGS11\_Chicken\_XP-001231808 YPRFLKSDMYKEMLAKAVVPEQTKI---RVFPFTRWRHSSPSPAL-LP-TPVPEPTAACGGGGD---G-VA--- 473  
RGS11\_Pigeon\_XP-005508486 YPRFLKSDMYKEMLAKAVVPEQTKI---RVFPFTRWRHSSPSPAL-LP-TPVPEPTAACGGGGD---G-VA--- 450  
RGS11\_Ground-tit\_XP-014107999 YPRFLKSDMYKEMLAKAVVPEQTKI---RVFPFTRWRHSSPSPAL-LP-TPVPEPTAACGGGGD---G-VA--- 450  
RGS11\_Turtle\_XP-007066592 YPRFLKSDMYKEMLAKAVVPEQTKI---RVFPFTRWRHSSPSPAL-LP-TPVPEPTAACGGGGD---G-VA--- 427  
RGS11\_Alligator\_XP-014457643 YPRFLKSDMYKEMLAKAVVPEQTKI---RVFPFTRWRHSSPSPAL-LP-TPVPEPTAACGGGGD---G-VA--- 432  
RGS11\_Anole\_XP-003227697 YPRFLKSDMYKEMLAKAVVPEQTKI---RVFPFTRWRHSSPSPAL-LP-TPVPEPTAACGGGGD---G-VA--- 470  
RGS11\_Nanorana\_XP-018423234 YPRYLKSEMYKEMLAKAVVPEQTKI---GVFPFMRRLRSLSSPSPAF-LF---PPGDESKADGDSRVNSPAAQSGE--- 452  
RGS11\_Xenopus\_NP-001096497 YPRYLKSEMYKEMLAKAVVPEQTKI---GVFPFMRRLRSLSSPSPAF-LF---PPGDESKADGDSRVNSPAAQSGE--- 469  
RGS11\_Florida\_gar\_29521-1-2 YPRFLKSDLYKEMLAKAVVPEQTKI---SVFPFMRRLRSLSSPSPA-LVS---CPAEDDGKSKAA---PSSSGTVSQV-EE--- 471  
RGS11\_Bowfin\_26311-1-2w1-5 YPRYLKSDLYKEMLAKAVVPEQTKI---SVFPFMRRLRSLSSPSPA-LVS---CPAEDDGKSKAA---PSSSGTVSQV-EE--- 469  
RGS11\_Zebrafish\_XP-005170921 YPRYLKSDLYKEMLAKAVVPEQTKI---SVFPFMRRLRSLSSPSPA-LVS---CPAEDDGKSKAA---PSSSGTVSQV-EE--- 471  
RGS11\_Medaka\_XP-011484761 YPRYLKSDLYKEMLAKAVVPEQTKI---SVFPFMRRLRSLSSPSPA-LVS---CPAEDDGKSKAA---PSSSGTVSQV-EE--- 487  
RGS11\_Reef\_shark\_50711-1-1 YPRYLKSDMYKEMLAKAVVPEQTKI---CMIPFLRWYRNSQSSA-OMF---YPKDGDGKGD---TVSQV-ON--- 461  
RGS11\_Bamboo\_shark\_41815-1-3 YPRYLKSDMYKEMLAKAVVPEQTKI---SMVPFMRWHRYNSASSV-OMF---YPKDNDGKGD---TVSQV-ON--- 465  
RGS11\_Bluespot\_ray\_32308-1-2 YPRYLKSDMYKEMLAKAVVPEQTKI---SVFPFTRWRHSSPSPAL-LP-TPVPEPTAACGGGGD---G-VA--- 467  
RGS11\_Western\_ray\_41178-3-3 YPRYLKSDMYKEMLAKAVVPEQTKI---SVFPFTRWRHSSPSPAL-LP-TPVPEPTAACGGGGD---G-VA--- 465  
RGS11\_M.mordax\_39562-1-2 YPRYLKSDLYKEMLAKAVVPEQTKI---HSH--- 413  
RGS11\_G.australis\_47497-1-2 YPRYLKSDLYKEMLAKAVVPEQTKI---HPLSGTRSL--- 419  
RGS11-Partial-Trimmed\_P.marinus\_S4RW55 YPRYLKSDLYKEMLAKAVVPEQTKI---HPLSGTRSL--- 391  
RGS11-Partial-Trimmed\_L.camtschaticum\_JL5627 YPRYLKSDLYKEMLAKAVVPEQTKI---HPLSGTRSL--- 300  
RGS11\_E.cirrhatu\_136920-1-2 YPRYLKSEMYKEMLAKAVVPEQTKI---RIFPLMMRRLSSPPIIT-LOG---I--- 433  
RGS\_S.kowalevskii\_XP-006813443 YPRFLKSDAYKEMLAKAVVPEQTKI---LKTAKVTPNASPOPLRRR---GS-ANDMTHKAHNARHGLSLSTGNL---ODLDSDEKINADFLYSDVYCGGESKENSPPN-QSPTSN 531  
RGS-Partial\_S.purpuratus\_XP-011673106 YQRFLKSDYKEMLAKAVVPEQTKI---RRTSLEKFTRSVGVKSLAGKR---LGLM-OS 363  
RGS6\_Human\_NP-001191345 YPRFLKSDAYKEMLAKAVVPEQTKI---RRTSLEKFTRSVGVKSLAGKR---LGLM-OS 489  
RGS7\_Human\_NP-002915 YPRFLKSDAYKEMLAKAVVPEQTKI---RRTSLEKFTRSVGVKSLAGKR---LGLM-OS 486

.....490.....500.....510.....520.....530.....540.....550.....560.....570.....580.....590.....600

|                                              |                                                                                |     |
|----------------------------------------------|--------------------------------------------------------------------------------|-----|
| RGS9_Human_NP-001159405                      | -K-                                                                            | 484 |
| RGS9_Cattle_NP-776595                        | -K-                                                                            | 484 |
| RGS9_Koala_XP-020856566                      | -K-                                                                            | 485 |
| RGS9_Opossum_XP-007482817                    | -K-                                                                            | 484 |
| RGS9_Pigeon_XP-013225676                     | -K-                                                                            | 470 |
| RGS9_Quail_XP-015735540                      | -K-                                                                            | 488 |
| RGS9_Ground-tit_XP-014111246                 | -K-                                                                            | 485 |
| RGS9_Turtle_XP-014424786                     | -K-                                                                            | 459 |
| RGS9_Python_XP-007421674                     | AN-                                                                            | 487 |
| RGS9_Garter_snake_XP-013926935               | AK-                                                                            | 487 |
| RGS9_X.laevis_XP-018090999                   | P                                                                              | 485 |
| RGS9_Florida_gar_21856-1-2                   | KI-                                                                            | 489 |
| RGS9_Bowfin_26690-1-1                        |                                                                                | 487 |
| RGS9_Zebrafish_NP-001314729                  |                                                                                | 480 |
| RGS9_Medaka_XP-004071947                     |                                                                                | 481 |
| RGS9_Reef_shark_51239-1-1                    | QE--AQ-                                                                        | 491 |
| RGS9_Bamboo_shark_45486-8-1                  | QE--A-                                                                         | 490 |
| RGS9_Bluespot_ray_37076-2-1                  | PE--AQ-                                                                        | 490 |
| RGS9_Western_ray_41046-8-8                   | PE--AQ-                                                                        | 490 |
| RGS9_Elephant_shark_XP-007886905             | EEPPKQ-                                                                        | 495 |
| RGS9_M.mordax_34174-1-2                      |                                                                                | 478 |
| RGS9_G.australis_56905-1-2                   |                                                                                | 478 |
| RGS9_E.cirrhatuS_137654-1-3                  | SNAISCNPMON-                                                                   | 498 |
| RGS11_Human_NP-899180                        |                                                                                | 467 |
| RGS11_Cattle_NP-001069282                    |                                                                                | 465 |
| RGS11_Koala_XP-020862219                     |                                                                                | 481 |
| RGS11_Opossum_XP-001372371                   |                                                                                | 476 |
| RGS11_Chicken_XP-001231808                   |                                                                                | 473 |
| RGS11_Pigeon_XP-005508486                    |                                                                                | 450 |
| RGS11_Ground-tit_XP-014107999                |                                                                                | 450 |
| RGS11_Turtle_XP-007066592                    |                                                                                | 427 |
| RGS11_Alligator_XP-014457643                 |                                                                                | 432 |
| RGS11_Anole_XP-003227697                     |                                                                                | 470 |
| RGS11_Nanorana_XP-018423234                  |                                                                                | 452 |
| RGS11_Xenopus_NP-001096497                   |                                                                                | 469 |
| RGS11_Florida_gar_29521-1-2                  |                                                                                | 471 |
| RGS11_Bowfin_26311-1-2w1-5                   |                                                                                | 469 |
| RGS11_Zebrafish_XP-005170921                 |                                                                                | 471 |
| RGS11_Medaka_XP-011484761                    |                                                                                | 487 |
| RGS11_Reef_shark_50711-1-1                   |                                                                                | 461 |
| RGS11_Bamboo_shark_41815-1-3                 |                                                                                | 465 |
| RGS11_Bluespot_ray_32308-1-2                 |                                                                                | 467 |
| RGS11_Western_ray_41178-3-3                  |                                                                                | 465 |
| RGS11_M.mordax_39562-1-2                     |                                                                                | 413 |
| RGS11_G.australis_47497-1-2                  |                                                                                | 419 |
| RGS11-Partial-Trimmed_P.marinus_S4RW55       |                                                                                | 391 |
| RGS11-Partial-Trimmed_L.camtschaticum_JL5627 |                                                                                | 300 |
| RGS11_E.cirrhatuS_136920-1-2                 |                                                                                | 433 |
| RGS_S.kowalevskii_XP-006813443               | KKFIIIGSPIISRKKVNFITQEHVNMSEVLPKRYPVNSPDSPEVDINSKPLSFPVPSKKSLLITPWEEODIPTDSSLN | 607 |
| RGS-Partial_S.purpuratus_XP-011673106        | SRFASLQPMNSTNLKRHGSLG-                                                         | 385 |
| RGS6_Human_NP-001191345                      |                                                                                | 490 |
| RGS7_Human_NP-002915                         |                                                                                | 487 |
|                                              | .....610.....620.....630.....640.....650.....660.....670.....                  |     |



```

: * * * : * * *
Gb5L_Human_NP-057278      LSACSF TNSDMQ IIL TAS GDGT CALWDVES GQLLQ SFHGHG ADVLCLDLAP SETGNT FVSGGCDKKAMVWDMRSGQCVQAFETHESDINSVRYPPSGDAFA 297
Gb5L_Cattle_XP-010807658 LSACSF TNSDMQ IIL TAS GDGT CALWDVES GQLLQ SFHGHG ADVLCLDLAP SETGNT FVSGGCDKKAMVWDMRSGQCVQAFETHESDINSVRYPPSGDAFA 296
Gb5L_Opossum_XP-007480030 LSACSF TNSDMQ IIL TAS GDGT CALWDVES GQLLQ SFHGHG ADVLCLDLAP SETGNT FVSGGCDKKAMVWDMRSGQCVQAFETHESDINSVRYPPSGDAFA 297
Gb5L_Ground_tit_XP-005521542 LSACSF TNSDMQ IIL TAS GDGT CALWDVES GQLLQ SFHGHG ADVLCLDLAP SETGNT FVSGGCDKKAMVWDMRSGQCVQAFETHESDINSVRYPPSGDAFA 296
Gb5L_Crow_XP-008638229    LSACSF TNSDMQ IIL TAS GDGT CALWDVES GQLLQ SFHGHG ADVLCLDLAP SETGNT FVSGGCDKKAMVWDMRSGQCVQAFETHESDINSVRYPPSGDAFA 296
Gb5L_Falcon_XP-005241495 LSACSF TNSDMQ IIL TAS GDGT CALWDVES GQLLQ SFHGHG ADVLCLDLAP SETGNT FVSGGCDKKAMVWDMRSGQCVQAFETHESDINSVRYPPSGDAFA 297
Gb5L_Turtle_XP-007056427 LSACSF TNSDMQ IIL TAS GDGT CALWDVES GQLLQ SFHGHG ADVLCLDLAP SETGNT FVSGGCDKKAMVWDMRSGQCVQAFETHESDINSVRYPPSGDAFA 297
Gb5L_Alligator_XP-019333396 LSACSF TNSDMQ IIL TAS GDGT CALWDVES GQLLQ SFHGHG ADVLCLDLAP SETGNT FVSGGCDKKAMVWDMRSGQCVQAFETHESDINSVRYPPSGDAFA 297
Gb5L_Xenopus_XP-012814636 LSACSF TNSDMQ IIL TAS GDGT CALWDVES GQLLQ SFHGHG ADVLCLDLAP SETGNT FVSGGCDKKAMVWDMRSGQCVQAFETHESDINSVRYPPSGDAFA 297
Gb5L_Nanorana_XP-018431551 LSACSF TNSDMQ IIL TAS GDGT CALWDVES GQLLQ SFHGHG ADVLCLDLAP SETGNT FVSGGCDKKAMVWDMRSGQCVQAFETHESDINSVRYPPSGDAFA 297
Gb5L_Coelacanth_XP-014351988 LSSCSFTNSDMQ IIL TAS GDGT CALWDVES GQLLQ SFHGHG ADVLCLDLAP SETGNT FVSGGCDKKAMVWDMRSGQCVQAFETHESDINSVRYPPSGDAFA 297
Gb5L_Florida_gar_16504-1-1 LSACSF TNSDMQ IIL TAS GDGT CALWDVES GQLLQ SFHGHG ADVLCLDLAP SETGNT FVSGGCDKKAMVWDMRSGQCVQAFETHESDINSVRYPPSGDAFA 297
Gb5L_Bowfin_22627-1-1    LSACSF TNSDMQ IIL TAS GDGT CALWDVES GQLLQ SFHGHG ADVLCLDLAP SETGNT FVSGGCDKKAMVWDMRSGQCVQAFETHESDINSVRYPPSGDAFA 297
Gb5L_Zebrafish_NP-957040  LSSCSFTNSDMQ IIL TAS GDGT CALWDVES GQLLQ SFHGHG ADVLCLDLAP SETGNT FVSGGCDKKAMVWDMRSGQCVQAFETHESDINSVRYPPSGDAFA 297
Gb5L_Medaka_XP-011491247 VSGCFTNSDMQ IIL TAS GDGT CALWDVES GQLLQ SFHGHG ADVLCLDLAP SETGNT FVSGGCDKKAMVWDMRSGQCVQAFETHESDINSVRYPPSGDAFA 297
Gb5L_Reef_shark_40872-1-1 LSACSF TNSDMQ IIL TAS GDGT CALWDVES GQLLQ SFHGHG ADVLCLDLAP SETGNT FVSGGCDKKAMVWDMRSGQCVQAFETHESDINSVRYPPSGDAFA 297
Gb5L_Bamboo_shark_37645-2-1 LSACSF TNSDMQ IIL TAS GDGT CALWDVES GQLLQ SFHGHG ADVLCLDLAP SETGNT FVSGGCDKKAMVWDMRSGQCVQAFETHESDINSVRYPPSGDAFA 297
Gb5L_Bluespot_ray_28709-1-1 LSACSF TNSDMQ IIL TAS GDGT CALWDVES GQLLQ SFHGHG ADVLCLDLAP SETGNT FVSGGCDKKAMVWDMRSGQCVQAFETHESDINSVRYPPSGDAFA 297
Gb5L_Western_ray_37263-2-2 LSACSF TNSDMQ IIL TAS GDGT CALWDVES GQLLQ SFHGHG ADVLCLDLAP SETGNT FVSGGCDKKAMVWDMRSGQCVQAFETHESDINSVRYPPSGDAFA 297
Gb5S_Elephant_shark_XP-007904318 LSACSF TNSDMQ IIL TAS GDGT CALWDVES GQLLQ SFHGHG ADVLCLDLAP SETGNT FVSGGCDKKAMVWDMRSGQCVQAFETHESDINSVRYPPSGDAFA 255
Gb5L_M.mordax_41947-2-2   LSACCF TNSDMQ IIL TAS GDGT CALWDVES GQLLQ SFHGHG ADVLCLDLAP SETGNT FVSGGCDKKAMVWDMRSGQCVQAFETHESDINSVRYPPSGDAFA 297
Gb5L_G.australis_57438-2-2 LSACCF TNSDMQ IIL TAS GDGT CALWDVES GQLLQ SFHGHG ADVLCLDLAP SETGNT FVSGGCDKKAMVWDMRSGQCVQAFETHESDINSVRYPPSGDAFA 297
Gb5L-Partial_P.marinus_S4RZE3 LSACCF TNSDMQ IIL TAS GDGT CALWDVES GQLLQ SFHGHG ADVLCLDLAP SETGNT FVSGGCDKKAMVWDMRSGQCVQAFETHESDINSVRYPPSGDAFA 213
Gb5L_E.cirrhatuS_130391-1-2 LSACCF TNSDMQ IIL TAS GDGT CALWDVES GQLLQ SFHGHG ADVLCLDLAP SETGNT FVSGGCDKKAMVWDMRSGQCVQAFETHESDINSVRYPPSGDAFA 297
Gb5_S.kowalevskii_XP-002740524 MSCCSFTNSDMQ IIL TAS GDGT CALWDVES GQLLQ SFHGHG ADVLCLDLAP SETGNT FVSGGCDKKAMVWDMRSGQCVQAFETHESDINSVRYPPSGDAFA 254
Gb5_S.purpuratus_XP-792481  VSCCF TNSDMQ IIL TAS GDGT CALWDVES GQLLQ SFHGHG ADVLCLDLAP SETGNT FVSGGCDKKAMVWDMRSGQCVQAFETHESDINSVRYPPSGDAFA 256
.....210.....220.....230.....240.....250.....260.....270.....280.....290.....300

```

```

Gb5L_Human_NP-057278      SGGDDATCRLYDLRADREVAIYSKES IIFGASSVDFSLSGRLLFAGYNDY TINVWDLVKGSRVSIILFGHENRVSTLRVSPDGTAFCSGSWDHTLRVWA 395
Gb5L_Cattle_XP-010807658 SGGDDATCRLYDLRADREVAIYSKES IIFGASSVDFSLSGRLLFAGYNDY TINVWDLVKGSRVSIILFGHENRVSTLRVSPDGTAFCSGSWDHTLRVWA 394
Gb5L_Opossum_XP-007480030 SGGDDATCRLYDLRADREVAIYSKES IIFGASSVDFSLSGRLLFAGYNDY TINVWDLVKGSRVSIILFGHENRVSTLRVSPDGTAFCSGSWDHTLRVWA 395
Gb5L_Ground_tit_XP-005521542 SGGDDATCRLYDLRADREVAIYSKES IIFGASSVDFSLSGRLLFAGYNDY TINVWDLVKGSRVSIILFGHENRVSTLRVSPDGTAFCSGSWDHTLRVWA 394
Gb5L_Crow_XP-008638229    SGGDDATCRLYDLRADREVAIYSKES IIFGASSVDFSLSGRLLFAGYNDY TINVWDLVKGSRVSIILFGHENRVSTLRVSPDGTAFCSGSWDHTLRVWA 394
Gb5L_Falcon_XP-005241495 SGGDDATCRLYDLRADREVAIYSKES IIFGASSVDFSLSGRLLFAGYNDY TINVWDLVKGSRVSIILFGHENRVSTLRVSPDGTAFCSGSWDHTLRVWA 395
Gb5L_Turtle_XP-007056427 SGGDDATCRLYDLRADREVAIYSKES IIFGASSVDFSLSGRLLFAGYNDY TINVWDLVKGSRVSIILFGHENRVSTLRVSPDGTAFCSGSWDHTLRVWA 395
Gb5L_Alligator_XP-019333396 SGGDDATCRLYDLRADREVAIYSKES IIFGASSVDFSLSGRLLFAGYNDY TINVWDLVKGSRVSIILFGHENRVSTLRVSPDGTAFCSGSWDHTLRVWA 395
Gb5L_Xenopus_XP-012814636 SGGDDATCRLYDLRADREVAIYSKES IIFGASSVDFSLSGRLLFAGYNDY TINVWDLVKGSRVSIILFGHENRVSTLRVSPDGTAFCSGSWDHTLRVWA 395
Gb5L_Nanorana_XP-018431551 SGGDDATCRLYDLRADREVAIYSKES IIFGASSVDFSLSGRLLFAGYNDY TINVWDLVKGSRVSIILFGHENRVSTLRVSPDGTAFCSGSWDHTLRVWA 395
Gb5L_Coelacanth_XP-014351988 SGGDDATCRLYDLRADREVAIYSKES IIFGASSVDFSLSGRLLFAGYNDY TINVWDLVKGSRVSIILFGHENRVSTLRVSPDGTAFCSGSWDHTLRVWA 395
Gb5L_Florida_gar_16504-1-1 SGGDDATCRLYDLRADREVAIYSKES IIFGASSVDFSLSGRLLFAGYNDY TINVWDLVKGSRVSIILFGHENRVSTLRVSPDGTAFCSGSWDHTLRVWA 395
Gb5L_Bowfin_22627-1-1    SGGDDATCRLYDLRADREVAIYSKES IIFGASSVDFSLSGRLLFAGYNDY TINVWDLVKGSRVSIILFGHENRVSTLRVSPDGTAFCSGSWDHTLRVWA 395
Gb5L_Zebrafish_NP-957040  SGGDDATCRLYDLRADREVAIYSKES IIFGASSVDFSLSGRLLFAGYNDY TINVWDLVKGSRVSIILFGHENRVSTLRVSPDGTAFCSGSWDHTLRVWA 395
Gb5L_Medaka_XP-011491247 SASDDATCRFYDLRADREVAIYSKES IIFGASSVDFSLSGRLLFAGYNDY TINVWDLVKGSRVSIILFGHENRVSTLRVSPDGTAFCSGSWDHTLRVWA 395
Gb5L_Reef_shark_40872-1-1 SGGDDATCRLYDLRADREVAIYSKES IIFGASSVDFSLSGRLLFAGYNDY TINVWDLVKGSRVSIILFGHENRVSTLRVSPDGTAFCSGSWDHTLRVWA 395
Gb5L_Bamboo_shark_37645-2-1 SGGDDATCRLYDLRADREVAIYSKES IIFGASSVDFSLSGRLLFAGYNDY TINVWDLVKGSRVSIILFGHENRVSTLRVSPDGTAFCSGSWDHTLRVWA 395
Gb5L_Bluespot_ray_28709-1-1 SGGDDATCRLYDLRADREVAIYSKES IIFGASSVDFSLSGRLLFAGYNDY TINVWDLVKGSRVSIILFGHENRVSTLRVSPDGTAFCSGSWDHTLRVWA 395
Gb5L_Western_ray_37263-2-2 SGGDDATCRLYDLRADREVAIYSKES IIFGASSVDFSLSGRLLFAGYNDY TINVWDLVKGSRVSIILFGHENRVSTLRVSPDGTAFCSGSWDHTLRVWA 395
Gb5S_Elephant_shark_XP-007904318 SGGDDATCRLYDLRADREVAIYSKES IIFGASSVDFSLSGRLLFAGYNDY TINVWDLVKGSRVSIILFGHENRVSTLRVSPDGTAFCSGSWDHTLRVWA 353
Gb5L_M.mordax_41947-2-2   TGGDDATCRLYDLRADREVAIYSKES IIFGASSVDFSLSGRLLFAGYNDY TINVWDLVKGSRVSIILFGHENRVSTLRVSPDGTAFCSGSWDHTLRVWA 395
Gb5L_G.australis_57438-2-2 TGGDDATCRLYDLRADREVAIYSKES IIFGASSVDFSLSGRLLFAGYNDY TINVWDLVKGSRVSIILFGHENRVSTLRVSPDGTAFCSGSWDHTLRVWA 395
Gb5L-Partial_P.marinus_S4RZE3 TGGDDATCRLYDLRADREVAIYSKES IIFGASSVDFSLSGRLLFAGYNDY TINVWDLVKGSRVSIILFGHENRVSTLRVSPDGTAFCSGSWDHTLRVWA 213
Gb5L_E.cirrhatuS_130391-1-2 TGGDDATCRLYDLRADREVAIYSKES IIFGASSVDFSLSGRLLFAGYNDY TINVWDLVKGSRVSIILFGHENRVSTLRVSPDGTAFCSGSWDHTLRVWA 395
Gb5_S.kowalevskii_XP-002740524 TASDDATCRLYDLRADREVAIYSKES IIFGASSVDFSLSGRLLFAGYNDY TINVWDLVKGSRVSIILFGHENRVSTLRVSPDGTAFCSGSWDHTLRVWA 352
Gb5_S.purpuratus_XP-792481  TASDDATCRLYDLRADREVAIYSKES IIFGASSVDFSLSGRLLFAGYNDY TINVWDLVKGSRVSIILFGHENRVSTLRVSPDGTAFCSGSWDHTLRVWA 354
.....310.....320.....330.....340.....350.....360.....370.....380.....390.....

```

```

R9AP Human NP-997274 M-----AREE CKALLDGLNKITACYHHLVLTIVGGSADSONLRELE 41
R9AP Cattle NP-001159988 M-----AKEE CKALLDALNKATACYHHLVLTIVGGSADSONLRELE 41
R9AP Degu XP-004636749 M-----AREE SKALLDAFNKTACYHHLVLTIVGGSADSONLRELE 41
R9AP Opossum XP-007474849 M-----AKEE CKALLDALNRVTACYRHMVLSVGGTSDSONLREELK 41
R9AP Tasmanian devil XP-003757239 M-----AKEE CKVLLDALNRVTACYRHMVLSVGGTADSONLREELK 41
R9AP Koala XP-020840579 M-----AKEE CKALLDALSRVTACYRHMVLSVGGTADSONLREELK 41
R9AP Ground-tit XP-014110984 M-----VKEE CKALLDALNKVTACYRHMVLTIGGTSDSONLREELK 41
R9AP Quail XP-015729517 M-----VKEE CKALLDALSRVTACYRHMVLTIGGTSDSONLREELK 41
R9AP Golden eagle XP-011572427 M-----VKEE CKALLDALNKVTACYRHMVLTIGGTSDSONLREELK 41
R9AP Turtle XP-007058713 M-----VKEE CKALLDALSKVTACYRHMVLTIGGTSDSONLREELK 41
R9AP Alligator XP-014451063 M-----VKEE CKALLDALNKVAACYRHMVLTIGGTADSONLREELR 41
R9AP Garter snake XP-013923971 M-----AKEE CKALLDALSKVTACYRHLVLTIVGGAADSOELREELK 41
R9AP Gecko XP-015270350 M-----VKEE CKALLDALNKVTACYRQLVLTIGGTSDSONLREELK 41
R9AP Anole XP-016852891 M-----AKEE CKALLDALSKVTACYRHLVLTIVGASDSONLRELE 41
R9AP Xenopus XP-004913611 M-----LKEE CKALLDALNKVTACYRHLVLTIGGTSDSONLREELK 41
R9AP Nanorana XP-018425514 M-----PAEE CRALLDALNKVTACYRHLVLTIGGTSDSONLREELK 41
R9AP Coelacanth XP-006005212 M-----VKDE CKTLLDALNKVTACYRHMVLTIGVGTSDSONLREELK 41
R9AP Florida gar 28835-2-1 M-----GKEE CKTLLDALNKVTACYRHLVAVGTTSDSONLREELK 41
R9AP Bowfin 1668-1-1 M-----GKEE CKTMLDALNKVTACYRHLVIAVGGTSDSONLREELK 41
R9AP Zebrafish XP-005169975 M-----GKDE CKTMLDALNKVTACYRHLVIALGSTSDSONLREELK 41
R9AP Asian bonytongue XP-018594265 M-----GKEE CKTMLDALNRVTACYRHLVLTIGSTSDSONLREELR 41
R9AP Reef shark 40575-1-1 M-----MKDE CKALLDALNKVSACYRHLVICAGGTSDSONLREELK 40
R9AP Bamboo shark 37642-1-1 M-----VKDE CKTLLDALNKVSACYRHLVICAGGSSDSONLREELK 41
R9AP Bluespot ray 25945-2-2 M-----VNDE CKTLLDALNKVSACYRHLVICAGGTSDSONLREELK 41
R9AP Western ray 30726-1-1 M-----VKDE CKTLLDALNKVSACYRHLVICAGGTSDSONLREELK 41
R9AP Elephant shark XP-007887765 M-----VRDE CKTLLDALNKVSACYRHLVVCVGGTSDSONLREELR 41
R9AP M.mordax 41679-5-1 MA-----GASSAETDAQ CAALVQSLNKVTACHHHLAVSLGGSADCARLREELR 48
R9AP G.australis 56404-2-1 M-----AETDAQ CAALVQSLNKVTACHHHLAVSLGGSADCARLREELR 43
R9AP L.camtschaticum JL14914 MA-----TEGAESDSC CAALVQSLNKVTACHHHLAVSLGGSADCARLREELR 48
R9AP E.cirrhatus 138946-5-1 MP-----GSVMA-ACEE CRALVQALNKVTACFRQLVMSIGGSSDSLNLREELR 47
R9AP-B Xenopus XP-002941417 MP-----LQNVKVADEGVSNFQKVKEE CTTAVEGLHKVVACYRHLALTIGGSSDSIHLRDEL 58
R9AP-B Nanorana XP-018419161 MP-----IQNNKVGNEACINSLKVKEE CSTVVEALNKVVACYRHLAVSLGSSDSKRLREELR 58
R9AP-B-Partial Coelacanth XP-006013654 MP-----IQNIKVADEGVSNSQTKKEE CRALVEALNKVIACYRHLAICVGGSSDCNLRDEL 58
R9AP-B Florida gar 25574-1-1 MP-----VSNNKIANDGNADSIKSRREE AKALVEALIKVVACYRHAAEVGGSTDSNLRDEL 58
R9AP-B Zebrafish NP-001314844 MP-----LSNNKVADDS--STOPLQE GRAMVDSLIVKVVACYRHAAECVGGTSDSSLRRLDLR 56
R9AP-B Asian bonytongue XP-018613071 MT-----LCNSKVADRGDGSQQPLEE AKTLVDTLAKVVACYRQLSSCVGGSSDVRLRDEL 58
R9AP-B Reef shark 612-1-1 MP-----IQNSKVADEGTANSKARDD CRSLVDLNLKVTGCYKHLAIVGGSSDCTNLRDEL 58
R9AP-B Bamboo shark 45543-9-1 MP-----IQSSKVADEGTANSARERDE CRALVDLNLKVTGCYRHLAIVGGSADCSNLRDEL 58
R9AP-B Bluespot ray 37118-18-1 MP-----IQNIKVADEGTVGSAKARDD CRALVDLNLKVTGCYRHLAIVGGSADSAGLRDEL 58
R9AP-B Western ray 39739-1-1 MP-----IQNIKVADEGAAGSAKARDD CRALVDLNLKVTGCYRHLAIVGGSADSVGLRDEL 58
R9AP-B Elephant shark XP-007902235 MP-----IHSTKVADEGTAKSERARGE CRALVQSLNKVI GCYKHLAVNLGGSSDSTNLRDEL 58
R9AP-like Degu XP-004636181 MQ-----RC-PG-PREPE-DAATAE SRAALDALCRFAAGYRHLAMGVGSSADGPRLRALAE 53
R9AP-like Opossum XP-007475029 MR-----GGGAG-ERAREAREAVAE CRAAYEALNRFTASYRQLVIVGGSADGRRLRRALAE 55
R9AP-like Tasmanian devil XP-003759057 MR-----GAGPG-ERAREAREAVAE CRAAYEALNRFTASYRQLVIVGGSADGRRLRRALAE 55
R9AP-like Koala XP-020821390 MR-----GAGPG-ERAREAREAVAE CRAAYEALNRFTASYRQLVIVGGSADGRRLRRALAE 55
R9AP-like Quail XP-015737481 MA-----PG-RGAASGGARGV CVATQAAALCKAAAGHRQLVQLGGSSADGPOLREERR 52
R9AP-like Ground-tit XP-005524972 MA-----PGRRDACRGRGAVGT CATACVALCKATAGHRQLVQLGGSSADSPOLREERR 53
R9AP-like Turtle XP-007067829 MS-----HA-----PDSHSGVEVRGA CAATHISLSKVTIVWHQLALQLGGTSDSPOLRDELQ 52
R9AP-like Alligator XP-014450013 MA-----SRAPVGE CAAHAALGRVTAHRQLALLLGSAAACAQLREELQ 45
R9AP-like Coelacanth XP-005986755 MP-----LLRSRSVDDAONIGELVKE TKKAQALLSKILBCFRHLVLCIGGTSDSAKLRREE 57
R9AP-like Xenopus NP-001011277 MAAPEVSSAGPNMLHPNSRTLLRGRKRGHAAEDSSQGAVSD CKKMHSLSNKVTACYRQLVLCVGGTSDCTRLREELE 77
R9AP-like Nanorana XP-018419805 MSAPEVASPAPPHLHP-SRTLLRGRIRGHATESSGGQTVSE CKKVHISLNKVTACYRQLVLCVGGTSDCTRLREELE 76
R9AP-like Spotted gar XP-006639786 MS-----PWRRSVGELPAAGGSVAE CKKAQASLTRVTACFOQLAMCVGGSTDCSRLREELE 56
R9AP-like Zebrafish NP-001018364 MN-----RWQRSVVEITQTRKRVQNE CERAOVALSKVTACFOQMSISLGSNVGDSFLREEME 56
R9AP-like Asian bonytongue XP-018611369 MN-----RWRKSVGEIQARRAVAE CTRAOVAFSRVTACFOQLAICVGGSSDCSRLREELE 56
R9AP S.kowalevskii XP-006814063 MH-----LTIFFE RMLVREFNSATAYYRNLIITLGGSHDSESLRDELIR 43
R9AP S.purpuratus XP-011683108 MG-----TWIFLLGLLGRCTPLQKRASEFVKPSSAIHSSGMNALHFGKNMIRRHNSCNRNHSDIQQDPETDEIEDCGMPLCTKLVKDFNVETARYHDLTLTLGGSSDESEYLRDELK 111
R9AP S.purpuratus XP-011666321 M-----MKKTLHVPDISEYLRDELK 19
1.....10.....20.....30.....40.....50.....60.....70.....80.....90.....100.....110.....120.....130

```

R9AP Human NP-997274  
R9AP Cattle NP-001159988  
R9AP Degu XP-004636749  
R9AP Opossum XP-007474849  
R9AP Tasmanian devil XP-003757239  
R9AP Koala XP-020840579  
R9AP Ground-tit XP-014110984  
R9AP Quail XP-015729517  
R9AP Golden eagle XP-011572427  
R9AP Turtle XP-007058713  
R9AP Alligator XP-014451063  
R9AP Garter snake XP-013923971  
R9AP Gecko XP-015270350  
R9AP Anole XP-016852891  
R9AP Xenopus XP-004913611  
R9AP Nanorana XP-018425514  
R9AP Coelacanth XP-006005212  
R9AP Florida gar 28835-2-1  
R9AP Bowfin 1668-1-1  
R9AP Zebrafish XP-005169975  
R9AP Asian bonytongue XP-018594265  
R9AP Reef shark 40575-1-1  
R9AP Bamboo shark 37642-1-1  
R9AP Bluespot ray 25945-2-2  
R9AP Western ray 30726-1-1  
R9AP Elephant shark XP-007887765  
R9AP M. noronae 41679-5-1  
R9AP G. australis 56404-2-1  
R9AP L. camtschaticum JL14914  
R9AP E. cirrhatous 138946-5-1  
R9AP-B Xenopus XP-002941417  
R9AP-B Nanorana XP-018419161  
R9AP-B-Partial Coelacanth XP-006013654  
R9AP-B Florida gar 25574-1-1  
R9AP-B Zebrafish NP-001314844  
R9AP-B Asian bonytongue XP-018613071  
R9AP-B Reef shark 612-1-1  
R9AP-B Bamboo shark 45543-9-1  
R9AP-B Bluespot ray 37118-18-1  
R9AP-B Western ray 39739-1-1  
R9AP-B Elephant shark XP-007902235  
R9AP-like Degu XP-004636181  
R9AP-like Opossum XP-007475029  
R9AP-like Tasmanian devil XP-003759057  
R9AP-like Koala XP-020821390  
R9AP-like Quail XP-015737481  
R9AP-like Ground-tit XP-005524972  
R9AP-like Turtle XP-007067829  
R9AP-like Alligator XP-014450013  
R9AP-like Coelacanth XP-005986755  
R9AP-like Xenopus NP-001011277  
R9AP-like Nanorana XP-018419805  
R9AP-like Spotted gar XP-006639786  
R9AP-like Zebrafish NP-001018364  
R9AP-like Asian bonytongue XP-018611369  
R9AP S. kowalevskii XP-006814063  
R9AP S. purpuratus XP-011683108  
R9AP S. purpuratus XP-011666321

.....140.....150.....160.....170.....180.....190.....200.....210.....220.....230.....240.....250.....260



|                                         |                   |                |          |          |            |        |       |           |          |            |                 |         |         |     |     |
|-----------------------------------------|-------------------|----------------|----------|----------|------------|--------|-------|-----------|----------|------------|-----------------|---------|---------|-----|-----|
| R9AP Human NP-997274                    | VGEMIDNMEMKVNVP   | PRWTVQARQAAGAE | LLSTVS   | AGPSS    | V--VSL     | QER    | GGGCD | PR        | KALAAIL  | 216        |                 |         |         |     |     |
| R9AP Cattle NP-001159988                | VGEMIQDMEMKVNVP   | PRWTVQARQAAGAE | LLSSAS   | AGVSS    | VGGVSV     | EQR    | TGPCD | LS        | KAKAATI  | 218        |                 |         |         |     |     |
| R9AP Degu XP-004636749                  | VGKMINMEMKVNVP    | PRWTVQARQAAGAE | LLSSAS   | AGASS    | A--VSV     | PER    | TGPCD | LS        | KALAAIV  | 216        |                 |         |         |     |     |
| R9AP Opossum XP-007474849               | VGEMMYEMEMKVNVP   | POWTVQARQAAGAE | LLKSTIS  | AGASS    | GGFVSV     | EEER   | KVCFD | IS        | KLLAAIV  | 218        |                 |         |         |     |     |
| R9AP Tasmanian devil XP-003757239       | VGEMMYEMEMKVNVP   | POWTVQARQAAGAE | LLKSTIS  | AGASS    | GGFVSV     | EEER   | KVCFD | IS        | KLLAAIV  | 218        |                 |         |         |     |     |
| R9AP Koala XP-020840579                 | VGEMMYEMEMKVNVP   | POWTVQARQAAGAE | LLKSTIS  | AGASS    | GGFVSV     | EEER   | KVCFD | IS        | KLLAAIV  | 218        |                 |         |         |     |     |
| R9AP Ground-tit XP-014110984            | VGEMMYEMEMKVNVP   | POWTVQARQAAGAE | LLKSTIS  | AGASS    | IGMISV     | EEN    | KSFCD | IS        | KVLAGII  | 218        |                 |         |         |     |     |
| R9AP Quail XP-015729517                 | VGEMMYEMEMKVNVP   | POWTVQARQAAGAE | LLKSTIS  | VGASS    | IGMISV     | EEN    | KSFCD | IS        | KVLAGII  | 218        |                 |         |         |     |     |
| R9AP Golden eagle XP-011572427          | VGEMMYEMEMKVNVP   | POWTVQARQAAGAE | LLKSTIS  | VGASS    | IGMISV     | EEN    | KSFCD | IS        | KVLAGII  | 218        |                 |         |         |     |     |
| R9AP Turtle XP-007058713                | VGEMMYEMEMKVNVP   | POWTVQARQAAGAE | LLKSTIS  | VGASS    | IGMISV     | EEN    | KSFCD | IS        | KVLAGII  | 218        |                 |         |         |     |     |
| R9AP Alligator XP-014451063             | VGEMMYEMEMKVNVP   | PHWTVQARQAAGAE | LLKSTIS  | MGASS    | MGMISV     | EEN    | KSFCD | IS        | KVLAGVI  | 218        |                 |         |         |     |     |
| R9AP Garter snake XP-013923971          | VGEMMYEMEMKVNVP   | PRWTVQARQAAGAE | LLNSNIS  | GGAA     | LGAVSG     | VEN    | KTLCD | PS        | RVLAATI  | 218        |                 |         |         |     |     |
| R9AP Gecko XP-015270350                 | VGEMMYEMEMKVNVP   | POWTVQARQAAGAE | LLNSAIS  | VAA      | IGMIEV     | ES     | KSYCN | AR        | KAVAGSV  | 217        |                 |         |         |     |     |
| R9AP Anole XP-016852891                 | VGEMRYEMEMKVNVP   | POWTVQARQAAGAE | LLKSTIS  | AGASS    | LGLISA     | EEF    | KAFCD | VS        | RVLAGII  | 218        |                 |         |         |     |     |
| R9AP Xenopus XP-004913611               | MDEMMYEMEMKVNVP   | POWTVQARQAAGAE | LLKSTIS  | AGASP    | GIISL      | DDH    | KICD  | LN        | KVLAGVV  | 217        |                 |         |         |     |     |
| R9AP Nanorana XP-018425514              | VGEMMYEMEMKVNVP   | POWTVQARQAAGAE | LLKSTIS  | AGASS    | PGVST      | EDR    | KALCD | LS        | KLLAAMI  | 218        |                 |         |         |     |     |
| R9AP Coelacanth XP-006005212            | VEEMLYEMEMKVNVP   | POWTVQARQAAGAE | LLKSTIS  | VGASS    | VGALSD     | GS     | KSFCD | PS        | KALAGVI  | 218        |                 |         |         |     |     |
| R9AP Florida gar 28835-2-1              | VGEMMEEMEMKVNVP   | VAHVMVEAKQDP   | GAEKSTIS | VGASS    | IGVISV     | EEN    | KSPCD | PT        | KILAGVV  | 219        |                 |         |         |     |     |
| R9AP Bowfin 1668-1-1                    | VGEMMEEMEMKVNVP   | VAHVMVEAKQDP   | GAEKSTIS | VGASS    | IGVISV     | EEN    | KSGCE | PT        | KVLAGVI  | 219        |                 |         |         |     |     |
| R9AP Zebrafish XP-005169975             | VDQMMEEEMEMKVNVP  | QVAPWAVEAKQEA  | GAEKSTIS | VGNS     | VGVISICEEP |        | KEIVG | ENGTM     | KIFAGII  | 224        |                 |         |         |     |     |
| R9AP Asian bonytongue XP-018594265      | VVQMMEEEMEMKVNVP  | QVAPWAVEAKQEA  | GAEKSTIS | VGNS     | VGVISICEEP |        | KE    | MDSEAGLK  | KVFAGII  | 223        |                 |         |         |     |     |
| R9AP Reef shark 40575-1-1               | VKEMLIYEMEMKVNVP  | PRWTVQARQAAGAE | PE       | AGASS    | LGMISV     | HDDGN  | KKLCD | TS        | KVFAGAM  | 215        |                 |         |         |     |     |
| R9AP Bamboo shark 37642-1-1             | IGEMMYEMEMKVNVP   | LQWTVQARQAAGAE | LLKSTAS  | AGASS    | FGRMPN     | EGD    | KRLCD | TN        | KVFAGAM  | 220        |                 |         |         |     |     |
| R9AP Bluespot ray 25945-2-2             | VGEMIHHEMEMKVNVP  | LQWTVQARQAAGAE | LLKSTAS  | AGVSS    | LAAMS      | VSGDG  | DKLCD | TS        | KVFAGAM  | 219        |                 |         |         |     |     |
| R9AP Western ray 30726-1-1              | VGEMIIYEMEMKVNVP  | LQWTVQARQAAGAE | LLKSTAS  | AGASS    | FAVMSV     | GGGN   | DKLCD | TS        | KVFAGAM  | 225        |                 |         |         |     |     |
| R9AP Elephant shark XP-007887765        | VGDMLYQEMEMKVNVP  | PHWTVQARQAAGAE | LLKSTAS  | GRTDG    | RTARPER    |        |       | ASSR      |          | 206        |                 |         |         |     |     |
| R9AP M.mordax 41679-5-1                 | LGTMLNEMEMKVNVP   | PRWTVQARQAAGAE | LLKSTAS  | G--SS    | VAMLT      | TEGARG | DPCCY | PG        | RRLVAAF  | 224        |                 |         |         |     |     |
| R9AP G.australis 56404-2-1              | LGTMLNEMEMKVNVP   | PRWTVQARQAAGAE | LLKSTAS  | G--SS    | VAMLT      | TEGARG | DPCCD | PG        | RRLVAAF  | 219        |                 |         |         |     |     |
| R9AP L.camtschaticum JL14914            | LGTMLNEMEMKVNVP   | PRWTVQARQAAGAE | LLKSTAS  | G--SS    | VAMLT      | TEGARG | EPCCD | PG        | RRLVAAF  | 201        |                 |         |         |     |     |
| R9AP E.cirrhatius 138946-5-1            | VGELIAEMENKVNVP   | PRWTVQARQAAGAE | LLKSTAS  | GGGTS    | TGMLNV     | GARR   | RRTCR | LS        | RRLSALL  | 227        |                 |         |         |     |     |
| R9AP-B Xenopus XP-002941417             | VDNMITDMEMKVNVP   | LRWTVQARQAAGAE | LLKSTAS  |          | INDELKSTH  | DSS    | VVLLS | EEESNS    | KG--CCS  | DG         | QLIVSLL         | 236     |         |     |     |
| R9AP-B Nanorana XP-018419161            | VDNMITDMELRVNVP   | LRWTVQARQAAGAE | LLKSTAS  | MNDE     | RDNDVSS    |        | TALLS | VDEKES    | HN--CCN  | GC         | GLL             | 232     |         |     |     |
| R9AP-B-Partial Coelacanth XP-006013654  |                   |                |          |          |            |        |       |           |          |            |                 | 135     |         |     |     |
| R9AP-B Florida gar 25574-1-1            | VDKMIDNMEMKVNVP   | LRWTVQARQAAGAE | LLKSTAS  | LYADPLST | ETSS       |        | VALLS | LDEEDG    | GR--CCD  | RS         | QFFVSVV         | 235     |         |     |     |
| R9AP-B Zebrafish NP-001314844           | VDRITLDDMEMKVNVP  | LRWTVQARQAAGAE | LLKSTAS  | QYIDPVST | DSTS       |        | LALLS | MDDEAA    | QS--FCS  | RS         | QMFAMMM         | 235     |         |     |     |
| R9AP-B Asian bonytongue XP-018613071    | VDQMIEDMEMKVNVP   | LRWTVQARQAAGAE | LLKSTAS  | RYAEP    | LSAGD      | SS     | LALLS | SADAEP    | GR--RRE  | RS         | QLLVVVV         | 236     |         |     |     |
| R9AP-B Reef shark 612-1-1               | VDRMMENMEMKVNVP   | LRWTVQARQAAGAE | LLKSTAS  | AYHSV    | ISN        | DASS   | VALLS | CAEEEMR   | SN--CCD  | RE         | KCFMSML         | 235     |         |     |     |
| R9AP-B Bamboo shark 45543-9-1           | VDEMENMEMKVNVP    | LRWTVQARQAAGAE | LLKSTAS  | AYYSV    | LST        | DASS   | MALLS | SEEEEMR   | RHGR     | CCD        | RE              | KCFMSVL | 236     |     |     |
| R9AP-B Bluespot ray 37118-18-1          | VDRMVENMEMKVNVP   | LRWTVQARQAAGAE | LLKSTAS  | AYHSV    | LSN        | DTSS   | VALLS | VDEEVR    | GW--WCC  | RS         | KCLTSML         | 235     |         |     |     |
| R9AP-B Western ray 39739-1-1            | VDRMVENMEMKVNVP   | LRWTVQARQAAGAE | LLKSTAS  | AYHSV    | LSN        | DASS   | VALLS | VDEEVR    | GW--WCC  | RS         | KCLTSML         | 235     |         |     |     |
| R9AP-B Elephant shark XP-007902235      | VDRMAEDMEMKVNVP   | LRWTVQARQAAGAE | LLKSTAS  | EIHSV    | VSN        | DFSS   | TALLS | PEDEVR    | RR--ECCD | RE         | KWLVVMA         | 235     |         |     |     |
| R9AP-like Degu XP-004636181             | LAKLQLEMEKVNVP    | PPWVVEAATVGG   | PPG      | SEAA     |            |        | LFHHY | REEARA    | RCQ      |            | ANPV            | CRSKG   | 216     |     |     |
| R9AP-like Opossum XP-007475029          | LEEMLLEMETKVNVP   | PPWVVEAATVGG   | PPG      | AEEPS    |            |        | PEGS  | ARRSPG    | CCA      |            | QAPPGTTFGLQLTNF | PSCLWRK | KO      | 238 |     |
| R9AP-like Tasmanian devil XP-003759057  | LEEMLLEMETKVNVP   | PPWVVEAATVGG   | PPG      | ALEHS    |            |        | PESS  | AGRS      | PRG      | CCA        | RGPD            |         | RLOS    | 223 |     |
| R9AP-like Koala XP-020821390            | LEEMLVEMETKVNVP   | PPWVVEAATVGG   | PPG      | AEEPS    |            |        | LEGS  | AGRS      | PRG      | CCA        | RAPL            |         | RLOS    | 223 |     |
| R9AP-like Quail XP-015737481            | VRAMMVESTANIPLWTV | ESMHVGP        |          | EE--G    |            |        | TEPT  | SHRPPG    |          | TGSC       |                 | VL      |         | 199 |     |
| R9AP-like Ground-tit XP-005524972       | VRAITLAEMESGANIP  | PPWVVEAATVGG   | PPG      | AETSG    |            |        | TTTRA | AWGGPC    |          | AGHCCG     |                 | VL      |         | 208 |     |
| R9AP-like Turtle XP-007067829           | VGAMLLEMETRVNVP   | PPWVVEAATVGG   | PPG      | AEGSC    |            |        | SERQ  | AAEVAGGLG | CCGQ     | CODWPALCCT |                 | LS      |         | 234 |     |
| R9AP-like Alligator XP-014450013        | VGAMLLEMETRVNVP   | PPWVVEAATVGG   | PPG      | AE--     |            |        | AEGV  | GGEMPPGM  |          | EAPGHCT    |                 | VS      |         | 218 |     |
| R9AP-like Coelacanth XP-005986755       | IGKTLQEMELKANIP   | PIWSVEAEEA     | WAEEVTS  | SAVAL    | EDASS      |        | NDVL  | TMDESTN   | R--HCCY  | R          |                 | GCWL    |         | 229 |     |
| R9AP-like Xenopus NP-001011277          | MERMLHDMQMKVSIPI  | WTVQARQAAGAE   | LLKSTAS  | CDL      | DECSD      |        | NEIL  | LAGEDITS  | R--GCCA  | H          |                 | GOSLPGP |         | 260 |     |
| R9AP-like Nanorana XP-018419805         | VERMLHDMQMKVSIPI  | WTVQARQAAGAE   | LLKSTAS  | CDL      | DDCSD      |        | NEIL  | LAGEDISS  | R--GCCA  | G          |                 | ROSLARP |         | 258 |     |
| R9AP-like Spotted gar XP-006639786      | LERMAQDLQVSVPIWS  | VEAATVGG       | PPG      | ELDP     | DDRVT      | S      | EELLT | VEELSQ    | GAER     | QAGCCR     | YP              |         | GCRLGWI | 243 |     |
| R9AP-like Zebrafish NP-001018364        | IDVLEEMLQVSVPIWS  | VEAATVGG       | PPG      | VESS     | ADVSHV     | TF     | EEMME | VEVVSQ    | N--KTS   | GCCH       | HH              |         | NCKVGL  | 240 |     |
| R9AP-like Asian bonytongue XP-018611369 | LETMAQEMLRKVNVP   | PPWVVEAATVGG   | PPG      | EQDDEEV  |            |        | VEMS  | VEVTVT    | E        | GGRLAGCCH  | YP              |         | GCR     | 238 |     |
| R9AP S.kowalevskii XP-006814063         | LREMLLEMHRSIDIK   | PPWVVEAATVGG   | PPG      | VESS     | ADVSHV     | TF     | EEMME | VEVVSQ    | N--KTS   | GCCH       | HH              |         | NCKVGL  | 240 |     |
| R9AP S.purpuratus XP-011683108          | LRNLMSEMHRCVDIK   | PPWVVEAATVGG   | PPG      | VESS     | ADVSHV     | TF     | EEMME | VEVVSQ    | N--KTS   | GCCH       | HH              |         | NCKVGL  | 240 |     |
| R9AP S.purpuratus XP-011666321          | LRNLMSEMHRCVDIK   | PPWVVEAATVGG   | PPG      | VESS     | ADVSHV     | TF     | EEMME | VEVVSQ    | N--KTS   | GCCH       | HH              |         | NCKVGL  | 240 |     |
|                                         |                   |                |          |          |            |        |       |           |          |            |                 |         |         |     | 255 |
|                                         |                   |                |          |          |            |        |       |           |          |            |                 |         |         |     | 291 |
|                                         |                   |                |          |          |            |        |       |           |          |            |                 |         |         |     | 199 |

.....270.....280.....290.....300.....310.....320.....330.....340.....350.....360.....370.....380.....390

|                                         |                                                                                                               |     |
|-----------------------------------------|---------------------------------------------------------------------------------------------------------------|-----|
| R9AP_Human_NP-997274                    | -----FCGAVLLAAVALAVCVAKLS-----                                                                                | 235 |
| R9AP_Cattle_NP-001159988                | -----FSAVLLAAVALAVCVAKLS-----                                                                                 | 237 |
| R9AP_Degu_XP-004636749                  | -----FSAVLLAAVALALCVAKLS-----                                                                                 | 235 |
| R9AP_Opossum_XP-007474849               | -----FSAVLIIAVILAVCVVKLS-----                                                                                 | 237 |
| R9AP_Tasmanian_devil_XP-003757239       | -----FSAVLIIAVILAVCVVKLS-----                                                                                 | 237 |
| R9AP_Koala_XP-020840579                 | -----FSAVLIIAVILAVCVVKLS-----                                                                                 | 237 |
| R9AP_Ground-tit_XP-014110984            | -----FTAVLLIIAIVLAVCVVKLS-----                                                                                | 237 |
| R9AP_Quail_XP-015729517                 | -----FSAVLIIAIVLAVCVVKLS-----                                                                                 | 237 |
| R9AP_Golden_eagle_XP-011572427          | -----FSAVLIIAIVLAVCVVKLS-----                                                                                 | 237 |
| R9AP_Turtle_XP-007058713                | -----FSAVLIIAIVLAVCVVKLS-----                                                                                 | 237 |
| R9AP_Alligator_XP-014451063             | -----FSAVLIIAIVLAVCVVKLS-----                                                                                 | 237 |
| R9AP_Garter_snake_XP-013923971          | -----FTAVLLIIAIGLAVCVAKLS-----                                                                                | 237 |
| R9AP_Gecko_XP-015270350                 | -----FSAVLLIAVVLAVCVVKLS-----                                                                                 | 236 |
| R9AP_Anole_XP-016852891                 | -----FTAVLLVAIILAVCVAKLS-----                                                                                 | 237 |
| R9AP_Xenopus_XP-004913611               | -----FSAVLIIAIIILAVCVVKLS-----                                                                                | 236 |
| R9AP_Nanorana_XP-018425514              | -----FSAVLLVAVILAVCVVKLS-----                                                                                 | 237 |
| R9AP_Coelacanth_XP-006005212            | -----FTAVLMTAIVLAVCVVKLS-----                                                                                 | 237 |
| R9AP_Florida_gar_28835-2-1              | -----FTAVLFVAIVLALCVIKLS-----                                                                                 | 238 |
| R9AP_Bowfin_1668-1-1                    | -----FTAVLLIIAIIILAFCVIKLS-----                                                                               | 238 |
| R9AP_Zebrafish_XP-005169975             | -----FTAVLLIIAGILGYLVINL-----                                                                                 | 242 |
| R9AP_Asian_bonytongue_XP-018594265      | -----FTAIILMAGILAFCVIKLS-----                                                                                 | 242 |
| R9AP_Reef_shark_40575-1-1               | -----FAAVLIFAIALAVCVVKFA-----                                                                                 | 234 |
| R9AP_Bamboo_shark_37642-1-1             | -----FTAVLVFAIVLALCVVKFA-----                                                                                 | 239 |
| R9AP_Bluespot_ray_25945-2-2             | -----FSAVLIIAIVLAFCAIVKFA-----                                                                                | 238 |
| R9AP_Western_ray_30726-1-1              | -----FSAVLIIAIVLAACIVKFA-----                                                                                 | 244 |
| R9AP_Elephant_shark_XP-007887765        | -----FP-----TRAPTRSRRA-----                                                                                   | 218 |
| R9AP_M.mordax_41679-5-1                 | -----CGGALLLALVLAADVIFSL-----                                                                                 | 243 |
| R9AP_G.australis_56404-2-1              | -----CGGALLLAFVLAADVVMFA-----                                                                                 | 238 |
| R9AP_L.camtschaticum_JL14914            | -----CGGALLLALVLAADVVMFA-----                                                                                 | 220 |
| R9AP_E.cirrhatus_138946-5-1             | -----FTMIILLAVVLSVCVAKFA-----                                                                                 | 246 |
| R9AP-B_Xenopus_XP-002941417             | -----FCGTLVAITLYS-----IL-----                                                                                 | 251 |
| R9AP-B_Nanorana_XP-018419161            | -----FCGTLVAITLYS-----FL-----                                                                                 | 234 |
| R9AP-B-Partial_Coelacanth_XP-006013654  | -----FCGTLVAITLYS-----FL-----                                                                                 | 135 |
| R9AP-B_Florida_gar_25574-1-1            | -----LCGIAMVAVVLSVCVVYLL-----                                                                                 | 254 |
| R9AP-B_Zebrafish_NP-001314844           | -----LCGVAMFAVVLSVCVVFVLV-----                                                                                | 254 |
| R9AP-B_Asian_bonytongue_XP-018613071    | -----VSVAVAVATMLFVCIVVYLV-----                                                                                | 255 |
| R9AP-B_Reef_shark_612-1-1               | -----FCTVALIAVVLSVCVVNLA-----                                                                                 | 254 |
| R9AP-B_Bamboo_shark_45543-9-1           | -----FCTVALIAVGLSVCVVNLS-----                                                                                 | 255 |
| R9AP-B_Bluespot_ray_37118-18-1          | -----LCTAALAAVVLSVCAANIA-----                                                                                 | 254 |
| R9AP-B_Western_ray_39739-1-1            | -----LCTAALTAVVLSVCAANLA-----                                                                                 | 254 |
| R9AP-B_Elephant_shark_XP-007902235      | -----LCTAALVAVVLSVCVATFA-----                                                                                 | 254 |
| R9AP-like_Degu_XP-004636181             | -----LCTAALVAVVLSVCVATFA-----                                                                                 | 216 |
| R9AP-like_Opossum_XP-007475029          | -----HKNSF-----                                                                                               | 243 |
| R9AP-like_Tasmanian_devil_XP-003759057  | -----HCIVA-----                                                                                               | 228 |
| R9AP-like_Koala_XP-020821390            | -----HCIVA-----                                                                                               | 228 |
| R9AP-like_Quail_XP-015737481            | -----HCIVA-----                                                                                               | 199 |
| R9AP-like_Ground-tit_XP-005524972       | -----HCIVA-----                                                                                               | 208 |
| R9AP-like_Turtle_XP-007067829           | -----HCIVA-----                                                                                               | 234 |
| R9AP-like_Alligator_XP-014450013        | -----HCIVA-----                                                                                               | 218 |
| R9AP-like_Coelacanth_XP-005986755       | -----ICVIS-----                                                                                               | 234 |
| R9AP-like_Xenopus_NP-001011277          | -----LCMVS-----                                                                                               | 265 |
| R9AP-like_Nanorana_XP-018419805         | -----LCMVS-----                                                                                               | 263 |
| R9AP-like_Spotted_gar_XP-006639786      | -----LCLVN-----                                                                                               | 248 |
| R9AP-like_Zebrafish_NP-001018364        | -----LCLLS-----                                                                                               | 245 |
| R9AP-like_Asian_bonytongue_XP-018611369 | -----LCLMH-----                                                                                               | 243 |
| R9AP_S.kowalevskii_XP-006814063         | -----LSGLRGAHFIDIKYLVFVKAVVPLAFDFLDQVKLPINIGSVPLQCIHAQLDQRAASLGPGCATPELSAQDDVVPVPIPPPTVEQVCGGGQVNDQEDNKL----- | 354 |
| R9AP_S.purpuratus_XP-011683108          | -----V-----                                                                                                   | 292 |
| R9AP_S.purpuratus_XP-011666321          | -----LITLVFAFAAVLIICLVLLLEGK-----                                                                             | 220 |
|                                         | .....400.....410.....420.....430.....440.....450.....460.....470.....480.....                                 |     |
